# Supplementary material for: Plant Distribution Data Show Broader Climatic Limits than Expert-Based Climatic Tolerance Estimates
Source: PLoS One. 2016 Nov 21;11(11):e0166407. doi: 10.1371/journal.pone.0166407 (PMC5117642; doi:10.1371/journal.pone.0166407)
Supplement: S1 Table — (CSV) [file pone.0166407.s003.csv]

species	USDA_Symbol	USDA_Growth_Habit	FREQUENCY	gbif_minimum_temperature_Celsius	95th_percentile_gbif_min_temp_Celsius	95th_percentile_gbif_min_temp_Celsius_with_climate_correction	USDA_minimum temperature_Celsius	deltaCN_minimum_temperature	area_sqkm
Bistorta officinalis	POBI5	Forb/herb	6	-36.7	-32.45	-60	-27.77777778	32.22222222	2718240
Liriope muscari	LIMU6	Forb/herb	6	-8.3	-8.25	-30.14934661	-30.55555556	-0.40620895	410332
Bacopa rotundifolia	BARO	Forb/herb	6	-8	-7.825	-29.48817673	-36.11111111	-6.62293438	468609
Saccharum officinarum	SAOF	Graminoid	6	-7.1	-6.95	-28.12694462	-8.333333333	19.79361129	2872880
Laguncularia racemosa	LARA2	Tree, Shrub	6	-6.4	-6.275	-27.07685128	4.444444444	31.52129572	736358
Artocarpus altilis	ARAL7	Tree	6	-7.1	-1.35	-19.41505912	-8.333333333	11.08172579	180709
Hymenocallis liriosme	HYLI	Forb/herb	6	-1.2	-0.55	-18.17050404	-16.11111111	2.05939293	154597
Casuarina cunninghamiana	CACU8	Tree	6	4.9	7.4	-5.802738021	-5.555555556	0.247182465	11747.90039
Swietenia mahagoni	SWMA2	Tree	6	9.1	9.15	-3.080273802	4.444444444	7.524718246	42175.39844
Amyris elemifera	AMEL	Tree, Shrub	6	11.5	11.975	1.314561294	-9.444444444	-10.75900574	10587.59961
Cordyline fruticosa	COFR2	Tree, Subshrub, Shrub	6	12.5	12.7	2.442439328	1.666666667	-0.775772661	5030.740234
Coccoloba diversifolia	CODI8	Tree, Shrub	6	13.9	14.3	4.931549471	4.444444444	-0.487105027	1405.660034
Leymus racemosus	LERA5	Graminoid	7	-11.5	-11.41	-35.06533914	-36.11111111	-1.04577197	346040
Solanum melongena	SOME	Subshrub, Forb/herb	7	-11.6	-11.39	-35.03422526	-8.333333333	26.70089193	1555050
Trifolium nigrescens	TRNI3	Forb/herb	7	0.3	0.3	-16.84816428	-15.55555556	1.29260872	7604.549805
Piper methysticum	PIME	Shrub	7	0.9	1.02	-15.72806472	4.444444444	20.17250916	8547.790039
Podocarpus macrophyllus	POMA32	Tree	7	1.5	1.59	-14.84131923	-13.88888889	0.95243034	3279230
Crataegus aestivalis	CRAE	Tree, Shrub	7	1.6	1.87	-14.40572495	-22.22222222	-7.81649727	97817.20313
Araucaria heterophylla	ARHE12	Tree	7	2.5	2.53	-13.37896702	1.666666667	15.04563369	13447.7998
Eucalyptus leucoxylon	EULE13		7	2.5	2.74	-13.05227131	-5.555555556	7.496715754	220662
Atriplex nummularia	ATNU	Shrub	7	2.5	3.16	-12.3988799	-22.22222222	-9.82334232	5734.580078
Sideroxylon reclinatum	SIRER2	Shrub	7	3.7	3.73	-11.51213441	-19.44444444	-7.93231003	53331.80078
Dichanthium aristatum	DIAR5	Graminoid	7	5.8	6.37	-7.405102676	-5.555555556	1.84954712	64267.30078
Desmodium heterophyllum	DEHE9	Vine, Forb/herb	7	12.5	12.7	2.442439328	-11.11111111	-13.55355044	1414.060059
Cordia subcordata	COSU2	Tree	7	15.9	16.23	7.934038581	4.444444444	-3.489594137	1636.839966
Hedysarum sulphurescens	HESU	Forb/herb	8	-14.6	-14.355	-39.6468575	-36.11111111	3.53574639	5330.399902
Lathyrus tuberosus	LATU	Vine, Forb/herb	8	-10.4	-9.7	-32.40510268	-33.33333333	-0.92823065	1516710
Magnolia stellata	MAST6	Tree	8	-9.5	-9.5	-32.09396391	-22.22222222	9.87174169	151888
Fothergilla gardenii	FOGA	Shrub	8	-9.5	-8.66	-30.78718108	-22.22222222	8.56495886	456229
Vitis palmata	VIPA7	Vine	8	-7.3	-5.375	-25.67672682	-25	0.67672682	944661
Amelanchier obovalis	AMOB2	Shrub	8	-5	-4.93	-24.98444306	-30.55555556	-5.5711125	382639
Annona glabra	ANGL4	Tree, Shrub	8	9.3	10	-1.757934039	-7.777777778	-6.019843739	51021.19922
Eragrostis variabilis	ERVA	Graminoid	8	14	14.3	4.931549471	4.444444444	-0.487105027	1856.589966
Alopecurus arundinaceus	ALAR	Graminoid	9	-12.5	-12.22	-36.32545115	-41.66666667	-5.34121552	1321270
Pieris japonica	PIJA3		9	-9.5	-9.5	-32.09396391	-16.66666667	15.42729724	2634830
Lablab purpureus	LAPU6	Vine, Forb/herb	9	-8.6	-7.84	-29.51151213	-0.555555556	28.95595657	2396330
Pennisetum alopecuroides	PEAL	Graminoid	9	-7.6	-7.12	-28.39141257	-27.77777778	0.61363479	3509820
Ulmus serotina	ULSE	Tree	9	-5.5	-4.7	-24.62663348	-29.44444444	-4.81781096	102321
Aesculus sylvatica	AESY	Tree, Shrub	9	-2.7	-2.7	-21.5152458	-13.88888889	7.62635691	87110.70313
Saccharum brevibarbe	SABR18	Graminoid	9	-4.4	-2.64	-21.42190417	-22.22222222	-0.80031805	404553
Juncus roemerianus	JURO	Graminoid	9	-3	-2.6	-21.35967642	-8.333333333	13.02634309	397142
Nymphaea mexicana	NYME	Forb/herb	9	-5.7	-2.58	-21.32856254	-18.88888889	2.43967365	1322860
Manilkara zapota	MAZA	Tree	9	-7.1	0.54	-16.47479776	-8.333333333	8.141464427	1918700
Panicum coloratum	PACO2	Graminoid	9	0.4	1.12	-15.57249533	-30.55555556	-14.98306023	247942
Bothriochloa pertusa	BOPE2	Graminoid	9	0.1	5.14	-9.318606098	-8.333333333	0.985272765	638621
Lycium carolinianum	LYCA2	Shrub	9	5.6	5.64	-8.540759179	-8.333333333	0.207425846	696546
Aleurites moluccana	ALMO2		9	7.4	10.76	-0.575606721	9.444444444	10.02005117	8190.5
Franklinia alatamaha	FRAL	Tree, Shrub	10	-10.3	-9.31	-31.79838208	-19.44444444	12.35393764	1538580
Zelkova serrata	ZESE80	Tree	10	-7.9	-7.675	-29.25482265	-36.11111111	-6.85628846	4086230
Manihot esculenta	MAES	Subshrub, Shrub, Forb/herb, Tree	10	-8	-7.595	-29.13036714	-8.333333333	20.79703381	6309150
Macroptilium atropurpureum	MAAT80	Vine, Forb/herb	10	0.4	0.67	-16.27255756	-5	11.27255756	12951.7998
Ilex amelanchier	ILAM2	Tree, Shrub	10	2.2	2.2	-13.89234599	-11.11111111	2.78123488	27960.40039
Myrica inodora	MOIN	Tree, Shrub	10	2.7	2.835	-12.9044804	-8.333333333	4.571147067	20088.40039
Digitaria eriantha	DIER	Graminoid	10	2.6	3.68	-11.5899191	-8.333333333	3.256585767	1231820
Sorbus decora	SODE3	Tree, Shrub	11	-19.4	-18.55	-46.17299315	-45.55555556	0.61743759	306135
Aristida stricta	ARST5	Graminoid	11	-13.2	-9.4	-31.93839452	-13.88888889	18.04950563	1688330
Coffea arabica	COAR2	Tree, Shrub	11	-9.5	-7.95	-29.68263846	-8.333333333	21.34930513	5447870
Chondrosum brevisetum	BOBR	Graminoid	11	-5.3	-4.7	-24.62663348	-19.44444444	5.18218904	80564.10156
Viburnum obovatum	VIOB	Tree, Shrub	11	-8	-3.05	-22.05973864	-16.11111111	5.94862753	641823
Pinus canariensis	PICA15		11	-5.9	-1.6	-19.80398258	0	19.80398258	172388
Brachiaria ramosa	URRA	Graminoid	11	-1.7	-1.45	-19.5706285	11.11111111	30.68173961	567784
Paspalum saurae	PANOS	Graminoid	11	0.5	0.5	-16.53702551	-19.44444444	-2.90741893	1346970
Thespesia populnea	THPO3	Tree, Shrub	11	-8	0.55	-16.45924082	-0.555555556	15.90368526	1699420
Bidens mitis	BIMI	Forb/herb	11	1.3	1.45	-15.05911637	11.11111111	26.17022748	56771.39844
Yucca aloifolia	YUAL	Tree, Shrub	11	0.2	1.9	-14.35905414	-18.33333333	-3.97427919	1672060
Pittosporum viridiflorum	PIVI5	Tree	11	3.3	3.7	-11.55880523	-13.88888889	-2.33008366	1022400
Casuarina glauca	CAGL11	Tree	11	2.1	4.75	-9.925326696	-8.333333333	1.591993363	114989
Neonotonia wightii	NEWI2	Vine, Forb/herb	11	9.6	11.15	0.031113877	10	9.968886123	3146.139893
Senna gaudichaudii	SEGA2	Tree, Shrub	11	11.6	11.9	1.197884256	4.444444444	3.246560188	1157.25
Potentilla plattensis	POPL	Forb/herb	12	-21.1	-20.715	-49.54107032	-38.88888889	10.65218143	529166
Pinus mugo	PIMU80	Tree, Shrub	12	-12	-11.725	-35.5553827	-38.88888889	-3.33350619	3591030
Mangifera indica	MAIN3	Tree	12	-9.5	-8.18	-30.04044804	-8.333333333	21.70711471	3207410
Citrus sinensis	CISI		12	-7.7	-7.04	-28.26695706	-8.333333333	19.93362373	1970470
Coelorachis rugosa	CORU3	Graminoid	12	-3.9	-3.9	-23.38207841	-22.22222222	1.15985619	577137
Gordonia lasianthus	GOLA	Tree, Shrub	12	-0.9	-0.79	-18.54387057	-20	-1.45612943	271627
Nyssa ogeche	NYOG	Tree	12	1.2	1.2	-15.44803983	-22.22222222	-6.77418239	802472
Trilisa paniculata	CAPA53	Forb/herb	12	0.9	1.725	-14.63130056	-13.88888889	0.74241167	231752
Avicennia germinans	AVGE	Tree, Shrub	12	6.8	7.845	-5.110454263	-12.22222222	-7.111767957	41589.60156
Desmodium triflorum	DETR4	Forb/herb	12	7.8	9.09	-3.173615432	-8.888888889	-5.715273457	10248.90039
Sesbania tomentosa	SETO3	Shrub	12	14	14.3	4.931549471	10	5.068450529	6059.529785
Lycium sandwicense	LYSA3	Shrub	12	14.8	15.34	6.549471064	4.444444444	-2.10502662	2545.780029
Aster alpinus	ASAL3	Forb/herb	13	-38.9	-35.38	-60	-33.33333333	26.66666667	1876830
Schizachyrium tenerum	SCTE5	Graminoid	13	-13.2	-7.08	-28.32918482	-11.11111111	17.21807371	2256480
Cocos nucifera	CONU	Tree	13	-7.1	-6.68	-27.70690728	-7.777777778	19.9291295	4674060
Tabebuia heterophylla	TAHE	Tree, Shrub	13	-6.4	-6.4	-27.27131301	0	27.27131301	1925940
Lupinus elmeri	LUEL2	Forb/herb	13	-3.8	-3.02	-22.01306783	-36.11111111	-14.09804328	5002.620117
Eleocharis cellulosa	ELCE	Graminoid	13	-0.5	1.3	-15.29247044	-11.11111111	4.18135933	368386
Torreya taxifolia	TOTA	Tree	13	3.7	3.76	-11.4654636	-11.11111111	0.35435249	2420.75
Spartina spartinae	SPSP	Graminoid	13	5.2	5.44	-8.851897946	-8.333333333	0.518564613	54162.69922
Morinda citrifolia	MOCI3	Tree, Shrub	13	13.6	14.72	5.584940884	2.222222222	-3.362718662	11141.59961
Gossypium tomentosum	GOTO	Shrub	13	15.5	15.7	7.109520846	10	2.890479154	704.1890259
Carex baileyi	CABA7	Graminoid	14	-16.3	-16.3	-42.67268202	-36.11111111	6.56157091	215146
Tsuga caroliniana	TSCA2	Tree	14	-10.3	-9.78	-32.52955818	-16.66666667	15.86289151	670620
Chaenomeles japonica	CHJA2	Shrub	14	-9.4	-8.555	-30.62383323	-41.66666667	-11.04283344	2162940
Alopecurus myosuroides	ALMY	Graminoid	14	-9.5	-6.51	-27.44243933	-33.33333333	-5.890894	4047990
Sorghum drummondii	SOBID	Graminoid	14	-8.3	-6.09	-26.78904792	13.88888889	40.67793681	1188460
Pinus serotina	PISE	Tree	14	-11.5	-5.91	-26.50902302	-19.44444444	7.06457858	483512
Hypericum galioides	HYGA	Subshrub	14	-2.5	-1.72	-19.99066584	-19.44444444	0.5462214	292075
Trachelospermum jasminoides	TRJA	Vine	14	-7.7	-1.265	-19.28282514	-13.88888889	5.39393625	2947030
Pennisetum purpureum	PEPU2	Graminoid	14	0.8	1.19	-15.46359676	-8.333333333	7.130263427	869851
Brachiaria mutica	URMU	Graminoid	14	0.5	3.035	-12.59334163	-8.333333333	4.260008297	3106850
Erythrina sandwicensis	ERSA11	Tree	14	12.4	12.665	2.387990044	10	7.612009956	3249.699951
Alopecurus alpinus	ALAL2		15	-36.6	-31.01	-60	-36.11111111	23.88888889	2116770
Viburnum lantana	VILA	Tree, Shrub	15	-15.4	-14.07	-39.20348475	-36.11111111	3.09237364	2525500
Quercus texana	QUTE	Tree, Shrub	15	-11.8	-8.02	-29.79153703	-27.77777778	2.01375925	346099
Ranunculus laxicaulis	RALA2	Forb/herb	15	-7.3	-6.74	-27.80024891	-22.22222222	5.57802669	609419
Calamagrostis coarctata	CACO71	Graminoid	15	-8.4	-5.95	-26.57125078	-33.33333333	-6.76208255	23169.5
Zizaniopsis miliacea	ZIMI	Graminoid	15	-4.3	-2.69	-21.49968886	-11.11111111	10.38857775	460995
Eucalyptus robusta	EURO2	Tree	15	-1	-0.86	-18.65276914	-8.888888889	9.763880251	475172
Pinus clausa	PICL	Tree	15	-3.1	0.61	-16.36589919	-16.66666667	-0.30076748	205639
Paspalum conjugatum	PACO14	Graminoid	15	3.3	6.66	-6.953951462	-9.444444444	-2.490492982	38234.30078
Capparis sandwichiana	CASA4	Shrub	15	7.8	10.76	-0.575606721	4.444444444	5.020051165	3197.620117
Cibotium chamissoi	CICH	Tree	15	10.1	11.39	0.404480398	4.444444444	4.039964046	7807.350098
Carex ramenskii	CARA4	Graminoid	16	-24.4	-22.95	-60	-46.66666667	13.33333333	507559
Agrostis canina	AGCA4	Graminoid	16	-17	-15.95	-42.12818917	-36.11111111	6.01707806	971979
Cydonia oblonga	CYOB2	Tree, Shrub	16	-11	-10.7	-33.96079652	-30.55555556	3.40524096	3207320
Malus floribunda	MAFL80	Tree, Shrub	16	-11.3	-9.95	-32.79402614	-41.66666667	-8.87264053	1335660
Pancratium maritimum	HYCA9		16	-5.7	-5.325	-25.59894213	-19.44444444	6.15449769	608008
Cercis canadensis var texensis	CECAT	Tree, Shrub	16	-6.4	-4.825	-24.82109521	-22.22222222	2.59887299	1866800
Alnus maritima	ALMA7	Tree, Shrub	16	-4.6	-4.15	-23.77100187	-16.66666667	7.1043352	385644
Cyperus compressus	CYCO	Graminoid	16	-4.6	-2.5	-21.20410703	2.777777778	23.98188481	1951470
Bursera simaruba	BUSI	Tree, Shrub	16	9.1	10.9	-0.357809583	4.444444444	4.802254027	23894.90039
Larix decidua	LADE2	Tree	17	-12.5	-10.66	-33.89856876	-38.88888889	-4.99032013	1699660
Carex polymorpha	CAPO4	Graminoid	17	-11	-10.44	-33.55631612	-36.11111111	-2.55479499	18428.09961
Tilia cordata	TICO2	Tree	17	-12.5	-10.18	-33.15183572	-36.11111111	-2.95927539	2710750
Leucothoe axillaris	LEAX	Shrub	17	-8.5	-6.82	-27.92470442	-16.66666667	11.25803775	585717
Smilax walteri	SMWA	Shrub, Vine	17	-5	-4.76	-24.71997511	-22.22222222	2.49775289	631439
Carex joorii	CAJO2	Graminoid	17	-3.3	-2.98	-21.95084007	-19.44444444	2.50639563	621664
Axonopus compressus	AXCO	Graminoid	17	-1.4	-1.16	-19.11947729	-19.44444444	-0.32496715	2773310
Vicia lutea	VILU2	Vine, Forb/herb	17	-0.1	-0.02	-17.34598631	-30.55555556	-13.20956925	64511
Quercus pumila	QUPU80	Shrub	17	0.3	1.58	-14.85687617	-11.11111111	3.74576506	207374
Pandanus tectorius	PATE2	Tree	17	11.6	14.7	5.553827007	4.444444444	-1.109382563	7077.310059
Rubus idaeus	RUID	Subshrub	18	-18.6	-15.995	-42.1981954	-52.22222222	-10.02402682	3669840
Leymus flavescens	LEFL4	Graminoid	18	-13.3	-12.11	-36.15432483	-27.77777778	8.37654705	144642
Panicum scabriusculum	DISC2	Graminoid	18	-10.4	-10.315	-33.36185439	-19.44444444	13.91740995	602024
Vigna unguiculata	VIUN	Vine, Forb/herb	18	-11.4	-8.34	-30.28935905	8.333333333	38.62269238	2057330
Taxus baccata	TABA80	Tree, Shrub	18	-10.7	-8.235	-30.1260112	-33.33333333	-3.20732213	2863340
Gleditsia aquatica	GLAQ	Tree, Shrub	18	-6.5	-6.16	-26.89794648	-2.777777778	24.1201687	1318720
Sabal palmetto	SAPA	Tree	18	0.2	0.37	-16.73926571	-8.888888889	7.850376821	303178
Psidium guajava	PSGU	Tree, Shrub	18	-6.4	0.91	-15.89919104	0.555555556	16.4547466	3245090
Desmodium incanum	DEIN3	Subshrub, Forb/herb	18	7.8	8.1	-4.713752334	-14.44444444	-9.730692106	37037
Cibotium glaucum	CIGL	Tree	18	10.1	10.455	-1.050093342	4.444444444	5.494537786	9206.19043
Cornus mas	COMA21	Tree, Shrub	19	-10.8	-10.17	-33.13627878	-32.77777778	0.358501	328430
Eleocharis equisetoides	ELEQ	Graminoid	19	-10.2	-10.11	-33.04293715	-36.11111111	-3.06817396	1085080
Ilex crenata	ILCR2	Tree, Shrub	19	-9.5	-9.5	-32.09396391	-25	7.09396391	2263770
Coelorachis cylindrica	COCY	Graminoid	19	-8.8	-7.27	-28.62476665	-30.55555556	-1.93078891	850338
Ilex cornuta	ILCO80	Tree, Shrub	19	-4.9	-4.63	-24.51773491	-30.55555556	-6.03782065	4151830
Uniola paniculata	UNPA	Graminoid	19	-7.6	-2.56	-21.29744866	-13.88888889	7.40855977	1465250
Grevillea robusta	GRRO	Tree	19	-9.5	0.94	-15.85252022	-8.333333333	7.519186887	961835
Pinus elliottii	PIEL	Tree	19	1.2	1.65	-14.7479776	-27.77777778	-13.02980018	234703
Coccoloba uvifera	COUV	Tree, Shrub	19	10.6	11.05	-0.124455507	-8.333333333	-8.208877826	58536.80078
Parthenocissus tricuspidata	PATR6	Vine	20	-11.6	-11.03	-34.47417548	-33.33333333	1.14084215	3883450
Pachysandra terminalis	PATE11	Subshrub, Forb/herb	20	-11.1	-10.53	-33.69632856	-33.33333333	0.36299523	519369
Castanea mollissima	CAMO83	Tree	20	-11.5	-10.36	-33.43186061	-28.88888889	4.54297172	1634260
Taxus cuspidata	TACU	Tree	20	-13.5	-9.7	-32.40510268	-33.33333333	-0.92823065	671247
Limnobium spongia	LISP2	Forb/herb	20	-9.5	-9.215	-31.65059116	-31.11111111	0.53948005	3928400
Carica papaya	CAPA23	Tree, Shrub	20	-7.6	-7.125	-28.39919104	0	28.39919104	6240930
Sideroxylon lycioides	SILY	Tree, Shrub	20	-4.7	-3.56	-22.8531425	-32.77777778	-9.92463528	371729
Prunus padus	PRPA5	Tree, Shrub	21	-28.2	-27.6	-60	-36.11111111	23.88888889	1933430
Ulmus thomasii	ULTH	Tree	21	-15.3	-14	-39.09458619	-43.33333333	-4.23874714	1567220
Solidago fistulosa	SOFI	Forb/herb	21	-9.2	-5.4	-25.71561917	-13.88888889	11.82673028	1004330
Phyllostachys aurea	PHAU8	Vine, Shrub, Graminoid	21	-4.6	-2.9	-21.82638457	-19.44444444	2.38194013	3760780
Ipomoea pes-caprae	IPPE	Vine, Forb/herb	21	-1.7	4.1	-10.93652769	-8.333333333	2.603194357	2909520
Borrichia frutescens	BOFR	Subshrub	21	4	4.5	-10.31425016	-8.333333333	1.980916827	204952
Acorus calamus	ACCA4	Forb/herb	22	-18.3	-18.1	-45.47293093	-38.88888889	6.58404204	1659380
Persea borbonia	PEBO	Tree, Shrub	22	-17	-15.2	-40.96141879	-13.88888889	27.0725299	3010060
Bromus arvensis	BRAR5	Graminoid	22	-12.7	-9.09	-31.45612943	-30.55555556	0.90057387	2840220
Leersia lenticularis	LELE2	Graminoid	22	-10.1	-9.09	-31.45612943	-36.11111111	-4.65498168	1231470
Carya myristiciformis	CAMY	Tree	22	-8.4	-7.83	-29.4959552	-23.33333333	6.16262187	1179640
Iris fulva	IRFU	Forb/herb	22	-7.3	-7.26	-28.60920971	-31.11111111	-2.5019014	901685
Platanus acerifolia	PLHY3		22	-7.3	-6.095	-26.79682638	-30.55555556	-3.75872918	2612130
Crotalaria spectabilis	CRSP2	Forb/herb	22	-4.8	0.015	-17.29153703	-13.88888889	3.40264814	1516470
Forsythia suspensa	FOSU	Shrub	23	-11	-10.84	-34.17859365	-41.66666667	-7.48807302	1821150
Rubus alumnus	RUAL9	Subshrub	23	-10.6	-10.38	-33.46297449	-33.33333333	0.12964116	231514
Juniperus chinensis	JUCH4	Tree, Shrub	23	-9.6	-9.47	-32.04729309	-36.11111111	-4.06381802	6146650
Prunus tomentosa	PRTO80	Tree, Shrub	23	-10.1	-9.38	-31.90728065	-38.88888889	-6.98160824	2218480
Platycladus orientalis	PLOR80	Tree, Shrub	23	-12.5	-7.67	-29.24704418	-33.33333333	-4.08628915	4282480
Fraxinus caroliniana	FRCA3	Tree, Shrub	23	-5.2	-0.27	-17.73490977	-16.66666667	1.0682431	2502700
Leucaena leucocephala	LELE10	Tree, Shrub	23	-6.4	1.38	-15.16801493	-3.888888889	11.27912604	2239090
Psathyrostachys juncea	PSJU3	Graminoid	24	-15.3	-15.27	-41.07031736	-41.66666667	-0.59634931	1751870
Festuca campestris	FECA4	Graminoid	24	-14.7	-14.46	-39.81020535	-38.88888889	0.92131646	277800
Symphyotrichum prenanthoides	SYPR6	Forb/herb	24	-11.9	-10.385	-33.47075296	-38.88888889	-5.41813593	306082
Planera aquatica	PLAQ	Tree	24	-5.7	-5.365	-25.66116988	-19.44444444	6.21672544	463126
Hibiscus aculeatus	HIAC	Forb/herb	24	1.3	1.445	-15.06689484	-9.444444444	5.622450396	142614
Alnus viridis subsp crispa	ALVIC	Tree, Shrub	25	-33.2	-32.46	-60	-52.22222222	7.77777778	3965320
Malus sieboldii	MASI80		25	-10.4	-10	-32.87181083	-36.11111111	-3.23930028	1418060
Ligustrum ovalifolium	LIOV	Tree, Shrub	25	-10.3	-9.04	-31.37834474	-19.44444444	11.9339003	5660960
Rhododendron arborescens	RHAR3	Shrub	25	-9.3	-8.9	-31.1605476	-25	6.1605476	344219
Ulmus crassifolia	ULCR	Tree	25	-6.4	-4.7	-24.62663348	-23.33333333	1.29330015	323437
Casuarina equisetifolia	CAEQ	Tree	25	0	2.24	-13.83011823	-5.555555556	8.274562674	1725260
Paspalum plicatulum	PAPL3	Graminoid	25	1.6	2.28	-13.76789048	-13.88888889	-0.12099841	643549
Sporobolus virginicus	SPVI3	Graminoid	25	3.7	4.7	-10.00311139	-8.333333333	1.669778057	554389
Penstemon lyallii	PELY2	Subshrub, Forb/herb	26	-16.9	-15.4	-41.27255756	-30.55555556	10.717002	101803
Philadelphus coronarius	PHCO7	Shrub	26	-16	-14.7	-40.18357187	-27.77777778	12.40579409	2986620
Hypericum denticulatum	HYDE2	Forb/herb	26	-10.7	-9.325	-31.82171749	-16.66666667	15.15505082	945509
Ribes erythrocarpum	RIER	Shrub	26	-10	-8.875	-31.12165526	-27.77777778	3.34387748	38631.5
Fraxinus profunda	FRPR	Tree	26	-8.8	-8.725	-30.88830118	-31.11111111	-0.22280993	3010180
Lagerstroemia indica	LAIN	Tree, Shrub	26	-6.4	-6.4	-27.27131301	-19.44444444	7.82686857	3937480
Hypericum calycinum	HYCA10	Subshrub, Shrub	26	-8.4	-2.5	-21.20410703	-41.66666667	-20.46255964	1670760
Persea palustris	PEPA37	Tree, Shrub	26	-13	-2.325	-20.93186061	-11.11111111	9.8207495	1598500
Malva assurgentiflora	LAAS	Subshrub, Shrub	26	3.7	4.6	-10.15868077	-0.555555556	9.603125214	67748.70313
Carex subspathacea	CASU8	Graminoid	27	-37.8	-35.22	-60	-46.66666667	13.33333333	1131250
Larix lyallii	LALY	Tree	27	-15.7	-14.2	-39.40572495	-50	-10.59427505	92349.10156
Phragmites australis	PHAU7	Subshrub, Shrub, Graminoid	27	-10.5	-8.98	-31.28500311	-38.88888889	-7.60388578	747710
Cryptomeria japonica	CRJA3	Tree	27	-9.5	-7.72	-29.32482887	-22.22222222	7.10260665	6927760
Hordeum californicum	HOBRC2	Graminoid	27	-9.3	-7.21	-28.53142502	-19.44444444	9.08698058	263331
Ligustrum japonicum	LIJA	Tree, Shrub	27	-4.6	-2.54	-21.26633479	-25	-3.73366521	5642170
Desmodium tortuosum	DETO	Subshrub, Forb/herb	27	-1.7	0.18	-17.03484754	-8.333333333	8.701514207	1703510
Primula incana	PRIN	Forb/herb	28	-33.3	-30.63	-60	-36.11111111	23.88888889	1170070
Pinus nigra	PINI	Tree	28	-18.1	-12.955	-37.46888612	-38.88888889	-1.42000277	2582190
Prunus nigra	PRNI	Tree	28	-13.5	-12.57	-36.869944	-4.444444444	32.42549956	4456660
Echinochloa frumentacea	ECFR	Graminoid	28	-18.1	-11.325	-34.93310516	2.777777778	37.71088294	1738530
Allium douglasii	ALDO	Forb/herb	28	-15.9	-11.035	-34.48195395	-33.33333333	1.14862062	152047
Pittosporum tobira	PITO2	Tree, Shrub	28	-9.5	-3.425	-22.64312383	-13.88888889	8.75423494	5202650
Amelanchier sanguinea	AMSA	Tree, Shrub	29	-19.4	-18.46	-46.03298071	-41.66666667	4.36631404	873672
Oenothera pilosella	OEPI2	Forb/herb	29	-11.8	-10.8	-34.1163659	-30.55555556	3.56081034	997623
Sporobolus interruptus	SPIN5	Graminoid	29	-9.3	-9.1	-31.47168637	-22.22222222	9.24946415	36972.30078
Pinus cembroides	PICE	Tree	29	-8	-6.86	-27.98693217	-36.11111111	-8.12417894	417331
Carya aquatica	CAAQ2	Tree	29	-6	-4.92	-24.96888612	-27.77777778	-2.80889166	783221
Hypericum cistifolium	HYCI	Subshrub, Shrub, Forb/herb	29	-9.2	-2.36	-20.98630989	-36.11111111	-15.12480122	952431
Juncus brachycephalus	JUBR2	Graminoid	30	-17.5	-17.185	-44.04947106	-33.33333333	10.71613773	839759
Balsamorhiza macrophylla	BAMA4	Forb/herb	30	-17.5	-16.545	-43.05382701	-30.55555556	12.49827145	76641.70313
Schoenoplectus heterochaetus	SCHE5	Graminoid	30	-14.7	-13.6	-38.47230865	-38.88888889	-0.41658024	3663510
Populus heterophylla	POHE4	Tree	30	-18.1	-9.555	-32.17952707	-30.55555556	1.62397151	1399890
Androsace laevigata	DOLA	Subshrub, Forb/herb	30	-14.9	-7.445	-28.89701307	-25	3.89701307	177987
Cedrus deodara	CEDE2	Tree	30	-7.3	-6.07	-26.75793404	-26.11111111	0.64682293	6051220
Trifolium vesiculosum	TRVE	Forb/herb	30	-6.6	-3.945	-23.45208463	-19.44444444	4.00764019	2571880
Pinus glabra	PIGL2	Tree	30	-8	1.045	-15.68917237	-18.88888889	-3.19971652	746195
Caragana arborescens	CAAR18	Tree, Shrub	31	-27.6	-25.35	-60	-38.88888889	21.11111111	5002830
Alnus glutinosa	ALGL2	Tree	31	-15	-13.4	-38.16116988	-27.77777778	10.3833921	2901770
Metasequoia glyptostroboides	MEGL8	Tree	31	-12.5	-11.9	-35.82762912	-25	10.82762912	3791130
Salix pentandra	SAPE4	Tree	31	-12.3	-11.35	-34.97199751	-38.88888889	-3.91689138	1409950
Veronica americana	VEAM2	Forb/herb	31	-9.4	-8.8	-31.00497822	-38.88888889	-7.88391067	297321
Vicia grandiflora	VIGR	Vine, Forb/herb	31	-8.1	-7.6	-29.13814561	2.777777778	31.91592339	927307
Styrax grandifolius	STGR4	Tree, Shrub	31	-2.7	-2.45	-21.12632234	-32.22222222	-11.09589988	320935
Ilex coriacea	ILCO	Tree, Shrub	31	-0.7	-0.25	-17.70379589	-13.88888889	3.814907	541058
Scaevola taccada	SCSE6	Shrub	31	-6.4	2.55	-13.34785314	-0.555555556	12.79229758	1857470
Carex leptonervia	CALE11	Graminoid	32	-17.4	-14.645	-40.09800871	-36.11111111	3.9868976	568489
Artemisia rigida	ARRI2	Subshrub, Shrub	32	-13.3	-10.46	-33.58742999	-41.66666667	-8.07923668	129819
Panicum ovale	DIOV	Graminoid	32	-10.4	-9.08	-31.4405725	-25	6.4405725	2000340
Cotoneaster horizontalis	COHO80	Shrub	32	-10.4	-8.29	-30.21157436	-33.33333333	-3.12175897	2591810
Hypericum densiflorum	HYDE	Shrub	32	-7.9	-7.335	-28.72588675	-13.88888889	14.83699786	929127
Quercus pagoda	QUPA5	Tree	32	-14.8	-6.24	-27.02240199	-21.66666667	5.35573532	1121200
Sacciolepis striata	SAST	Graminoid	32	-5.1	-4.66	-24.56440572	-27.77777778	-3.21337206	1189350
Setaria vulpiseta	SEVU2	Graminoid	32	-2.8	-2.8	-21.67081518	-25	-3.32918482	9965.490234
Geum rossii	GEROT	Forb/herb	33	-21	-16.04	-42.26820162	-3.333333333	38.93486829	640081
Prunus pumila var besseyi	PRPUB	Shrub	33	-15.4	-13.18	-37.81891724	-38.88888889	-1.06997165	950154
Pinus pungens	PIPU5	Tree	33	-17.7	-8.7	-30.84940884	-27.77777778	3.07163106	1979750
Brachiaria platyphylla	URPL2	Graminoid	33	-6.5	-4.3	-24.00435594	-8.333333333	15.67102261	1817100
Hypericum fasciculatum	HYFA	Shrub, Subshrub	33	-9.2	0.22	-16.97261979	-15.55555556	1.41706423	1209830
Acer nigrum	ACNI5	Tree	34	-16.5	-12.855	-37.31331674	-43.88888889	-6.57557215	1298020
Leucanthemum vulgare	LEVU	Forb/herb	34	-10.6	-8.455	-30.46826385	-33.33333333	-2.86506948	5260280
Ilex cassine	ILCA	Tree, Shrub	34	2.1	2.96	-12.71001867	-11.11111111	1.59890756	473799
Osteomeles anthyllidifolia	OSAN	Shrub	34	5.6	9.855	-1.983509645	1.666666667	3.650176312	5616.850098
Quercus laurifolia	QULA3	Tree	35	-3.2	-1.72	-19.99066584	-19.44444444	0.5462214	828478
Berberis fendleri	BEFE	Shrub	36	-17.4	-17.325	-44.2672682	-27.77777778	16.48949042	117963
Phlox subulata	PHSU3	Subshrub, Forb/herb	36	-11	-10.7	-33.96079652	-33.33333333	0.62746319	996002
Spartina cynosuroides	SPCY	Graminoid	36	-10.6	-8.2	-30.07156192	-19.44444444	10.62711748	3702020
Carex decomposita	CADE6	Graminoid	36	-9.9	-7.125	-28.39919104	-25	3.39919104	918335
Carex trichocarpa	CATR8	Graminoid	37	-11.8	-11.4	-35.0497822	-36.11111111	-1.06132891	918878
Aesculus flava	AEFL	Tree, Shrub	37	-8.4	-8.04	-29.8226509	-27.77777778	2.04487312	911373
Juglans microcarpa	JUMI	Tree, Shrub	37	-8.2	-8.02	-29.79153703	-19.44444444	10.34709259	2776490
Forestiera acuminata	FOAC	Tree, Shrub	37	-8.5	-7.66	-29.23148724	-27.77777778	1.45370946	790790
Flourensia cernua	FLCE	Shrub	37	-6	-5.9	-26.49346609	-30.55555556	-4.06208947	138953
Lemna trisulca	LETR	Forb/herb	38	-28	-26.045	-60	-38.88888889	21.11111111	4950760
Picea abies	PIAB	Tree	38	-18.1	-15.815	-41.9181705	-38.88888889	3.02928161	1293120
Carex muskingumensis	CAMU9	Graminoid	38	-14.5	-12.935	-37.43777225	-36.11111111	1.32666114	766085
Wisteria frutescens	WIFR	Vine	38	-11.8	-8.06	-29.85376478	-19.44444444	10.40932034	1716020
Panicum amarum	PAAM2	Graminoid	38	-8.4	-7.465	-28.92812694	-27.77777778	1.15034916	773667
Sabal minor	SAMI8	Tree, Shrub	38	-1.6	-0.02	-17.34598631	-13.88888889	3.45709742	1117610
Agave americana	AGAM	Subshrub, Shrub, Forb/herb	38	-6.1	0.68	-16.25700062	-11.11111111	5.14588951	1914580
Astragalus cicer	ASCI4	Forb/herb	39	-18.6	-16.87	-43.5594275	-41.66666667	1.89276083	1487790
Lachnanthes caroliana	LACA5	Forb/herb	39	-11.3	-7.57	-29.0914748	-10.55555556	18.53591924	590064
Sporobolus wrightii	SPWR2	Graminoid	39	-9.3	-6.01	-26.66459241	-25	1.66459241	708692
Tecoma stans	TEST	Tree, Shrub	39	-9.3	-5.26	-25.49782203	-8.333333333	17.1644887	2676550
Juncus subcaudatus	JUSU	Graminoid	40	-14.6	-11.325	-34.93310516	-22.22222222	12.71088294	665677
Liatris squarrulosa	LISQ2	Forb/herb	40	-8	-7.105	-28.36807716	-19.44444444	8.92363272	836622
Abies fraseri	ABFR	Tree	40	-6.8	-6.8	-27.89359054	-30.55555556	-2.66196502	68302.39844
Halesia diptera	HADI3	Tree, Shrub	40	-9.3	-6.4	-27.27131301	-12.22222222	15.04909079	1403960
Saccharum ravennae	SARA3	Graminoid	41	-10.2	-7.8	-29.44928438	-22.22222222	7.22706216	1557350
Nandina domestica	NADO	Shrub	41	-7.4	-5.6	-26.02675793	-16.66666667	9.36009126	5923760
Prunus serotina var rufula	PRSER2	Tree, Shrub	41	-10.2	-4.8	-24.78220286	-30.55555556	-5.7733527	114186
Serenoa repens	SERE2	Tree, Shrub	41	1.5	2.5	-13.42563783	-13.88888889	-0.46325106	2459540
Pinus banksiana	PIBA2	Tree	42	-22.1	-18.08	-45.44181705	-47.22222222	-1.78040517	3453420
Lysimachia maritima	GLMA	Forb/herb	42	-15.9	-14.99	-40.63472309	-36.11111111	4.52361198	3539450
Aristida arizonica	ARAR6	Graminoid	42	-11.8	-11.195	-34.73086497	-19.44444444	15.28642053	398341
Quercus laevis	QULA2	Tree	42	-3.1	-1.875	-20.23179838	-19.44444444	0.78735394	603796
Carex glaucescens	CAGL5	Graminoid	42	-1.9	0.505	-16.52924704	-25	-8.47075296	292622
Scirpus pedicellatus	SCPE3	Graminoid	43	-16.3	-14.53	-39.91910392	-33.33333333	6.58577059	404394
Phlox maculata	PHMAM	Forb/herb	43	-15.5	-10.68	-33.92968264	-27.77777778	6.15190486	1337400
Miscanthus sinensis	MISI	Graminoid	43	-10.4	-9.4	-31.93839452	-27.77777778	4.16061674	2457360
Nyssa aquatica	NYAQ2	Tree	43	-7	-6.33	-27.16241444	-30.55555556	-3.39314112	902059
Downingia laeta	DOLA2	Forb/herb	44	-11.5	-11.01	-34.44306161	11.11111111	45.55417272	110786
Cyperus lancastriensis	CYLA3	Graminoid	44	-7.4	-7.3	-28.67143746	-13.88888889	14.78254857	734620
Punica granatum	PUGR2	Tree, Shrub	44	-11.6	-6.485	-27.40354698	-25	2.40354698	5249980
Sophora secundiflora	SOSE3	Tree, Shrub	44	-3	-2.535	-21.25855632	-13.88888889	7.36966743	371297
Calamagrostis breweri	CABR	Graminoid	45	-10.8	-10.5	-33.64965775	-33.33333333	0.31632442	154569
Cladrastis kentukea	CLKE	Tree	45	-11.8	-9.9	-32.71624144	-35.55555556	-2.83931412	1123470
Helianthus debilis	HEDE4	Forb/herb	45	-9.1	-8.48	-30.50715619	-5.555555556	24.95160063	2329660
Pyracantha coccinea	PYCO2	Shrub	45	-10.6	-8.22	-30.10267579	-11.11111111	18.99156468	6275650
Opuntia ficus-indica	OPFI	Tree, Shrub	45	-10.6	-8.1	-29.91599253	-19.44444444	10.47154809	3266400
Iris bracteata	IRBR	Forb/herb	45	-7.2	-5.46	-25.8089608	-27.77777778	-1.96881698	62788.69922
Juncus validus	JUVA2	Graminoid	46	-16.9	-6.575	-27.54355943	-19.44444444	8.09911499	2012040
Crataegus marshallii	CRMA5	Tree, Shrub	46	-11	-4.7	-24.62663348	-19.44444444	5.18218904	1877080
Pinus palustris	PIPA2	Tree	46	-8	-2.275	-20.85407592	-19.44444444	1.40963148	1264730
Hydrolea quadrivalvis	HYQU	Forb/herb	46	-2.4	-1.875	-20.23179838	-11.11111111	9.12068727	215670
Cyperus haspan	CYHA	Graminoid	46	-6.4	-0.425	-17.97604231	-13.88888889	4.08715342	2428850
Pinus aristata	PIAR	Tree	47	-20.4	-18.17	-45.5818295	-36.11111111	9.47071839	1049070
Acer ginnala	ACGI	Tree, Shrub	47	-16.1	-14.79	-40.32358432	-38.88888889	1.43469543	2882460
Carya laciniosa	CALA21	Tree	47	-14.4	-10.38	-33.46297449	-30	3.46297449	1409030
Ferocactus wislizeni	FEWI	Tree, Shrub	47	-4.7	-4.27	-23.95768513	-30.55555556	-6.59787043	87105.10156
Acacia melanoxylon	ACME	Tree	48	1.8	2.875	-12.84225264	-10	2.84225264	103560
Poa pratensis	POPR	Graminoid	49	-36	-25.4	-60	-38.88888889	21.11111111	1749290
Hypericum ascyron	HYAS80	Forb/herb	49	-15.4	-14.6	-40.02800249	-30.55555556	9.47244693	4288830
Koelreuteria paniculata	KOPA	Tree	49	-12.5	-9.5	-32.09396391	-33.33333333	-1.23936942	3962880
Magnolia tripetala	MATR	Tree	49	-9.5	-9.1	-31.47168637	-19.44444444	12.02724193	1296880
Juncus repens	JURE2	Graminoid	49	-3.9	-3.12	-22.16863721	-11.11111111	11.0575261	904211
Oxytropis splendens	OXSP	Forb/herb	51	-34.8	-33.7	-60	-36.11111111	23.88888889	2303720
Carex projecta	CAPR9	Graminoid	51	-19.6	-17.6	-44.69508401	-36.11111111	8.5839729	3005680
Betula pumila	BEPU4	Shrub	51	-18.2	-16.9	-43.60609832	-38.88888889	4.71720943	2707340
Carex aperta	CAAP3	Graminoid	51	-18.9	-13.6	-38.47230865	-27.77777778	10.69453087	362467
Orthocarpus tenuifolius	ORTE2	Forb/herb	51	-14.7	-12.3	-36.44990666	11.11111111	47.56101777	201422
Calycocarpum lyonii	CALY2	Vine	51	-8.2	-7.85	-29.52706907	-19.44444444	10.08262463	375358
Styrax americanus	STAM4	Tree, Shrub	51	-6.8	-6	-26.64903547	-26.66666667	-0.0176312	654490
Smilax laurifolia	SMLA	Shrub, Vine	51	-13	-3.1	-22.13752334	-22.22222222	-0.08469888	2155030
Eragrostis superba	ERSU	Graminoid	51	-1.5	-0.85	-18.6372122	-11.11111111	7.52610109	292623
Rubus cuneifolius	RUCU	Subshrub	52	-15.9	-10.885	-34.24859988	-25	9.24859988	976479
Bothriochloa saccharoides	BOSA	Graminoid	52	-14.3	-10.39	-33.47853143	-30.55555556	2.92297587	2293050
Lupinus nevadensis	LUNE	Forb/herb	52	-10.6	-10.09	-33.01182327	-30.55555556	2.45626771	179064
Leymus salinus	LESA4	Graminoid	53	-16.4	-16.2	-42.51711263	-33.33333333	9.1837793	586554
Penstemon albertinus	PEAL11	Subshrub, Forb/herb	53	-16	-15.42	-41.30367144	-2.222222222	39.08144922	114701
Lupinus covillei	LUCO4	Forb/herb	53	-11.2	-9.64	-32.31176105	-5	27.31176105	15983.2998
Crataegus phaenopyrum	CRPH	Tree, Shrub	53	-10.8	-9.44	-32.00062228	-36.11111111	-4.11048883	3243940
Paspalum repens	PAFL5	Graminoid	53	-8.9	-8.34	-30.28935905	-30.55555556	-0.26619651	1616230
Quercus lyrata	QULY	Tree	53	-10.9	-7.28	-28.64032358	-30.55555556	-1.91523198	1770450
Onobrychis viciifolia	ONVI	Forb/herb	54	-16.8	-15.005	-40.65805849	-40	0.65805849	3926750
Panicum antidotale	PAAN4	Graminoid	54	-7.3	-6.4	-27.27131301	-16.66666667	10.60464634	2922160
Symplocos tinctoria	SYTI	Tree, Shrub	54	-5.3	-2.535	-21.25855632	-30	-8.74144368	632671
Lyonia lucida	LYLU3	Shrub	54	-9.2	-1.54	-19.71064095	-16.66666667	3.04397428	968822
Salicornia rubra	SARU	Subshrub, Forb/herb	55	-22.2	-20.93	-49.87554449	11.11111111	60.9866556	2239930
Amelanchier utahensis	AMUT	Tree, Shrub	55	-18	-15.54	-41.4903547	-33.33333333	8.15702137	848071
Carex abscondita	CAAB5	Graminoid	56	-11.3	-9.95	-32.79402614	-19.44444444	13.3495817	1019320
Ribes viburnifolium	RIVI	Shrub	56	5.4	7.1	-6.269446173	-19.44444444	-13.17499827	1092.77002
Mimulus dentatus	MIDE3	Forb/herb	57	-7.6	-5.46	-25.8089608	-16.66666667	9.14229413	76186.39844
Hypericum crux-andreae	HYCR3	Subshrub, Shrub	57	-8.3	-5.34	-25.62227754	-22.22222222	3.40005532	1245300
Arbutus arizonica	ARAR2	Tree	57	-9.3	-4.4	-24.15992533	-20	4.15992533	59197.5
Vaccinium elliottii	VAEL	Shrub	57	-4.2	-1.42	-19.52395769	-19.44444444	0.07951325	572588
Acacia cyclops	ACCY2	Shrub	57	3.7	4.88	-9.723086497	-10	-0.276913503	40434.69922
Morella caroliniensis	MOCA7	Tree, Shrub	58	-12.7	-9.545	-32.16397013	-25	7.16397013	913265
Bothriochloa bladhii	BOBL	Graminoid	58	-10.9	-9.53	-32.14063472	-30.55555556	1.58507916	1523120
Rosmarinus officinalis	ROOF	Subshrub, Shrub	58	-9.5	-5.09	-25.23335408	-19.44444444	5.78890964	4110870
Carex flaccosperma	CAFL3	Graminoid	59	-11.7	-9.56	-32.18730554	-22.22222222	9.96508332	1517620
Salix candida	SACA4	Shrub	60	-34.4	-33.205	-60	-36.11111111	23.88888889	3519940
Crataegus erythropoda	CRER	Tree, Shrub	60	-18.9	-17.4	-44.38394524	-45.55555556	-1.17161032	1578400
Lotus tenuis	LOTE4	Forb/herb	60	-20.7	-12.51	-36.77660236	-29.44444444	7.33215792	3877270
Populus nigra	PONI	Tree	60	-11.8	-10.325	-33.37741133	-33.33333333	0.044078	4214670
Quercus virginiana	QUVI	Tree	60	-8	-0.04	-17.37710019	-13.88888889	3.4882113	3496830
Carex bella	CABE3	Graminoid	61	-21	-19.7	-47.96204107	-27.77777778	20.18426329	499609
Ampelopsis arborea	AMAR5	Vine, Shrub	61	-8.3	-6.4	-27.27131301	-25	2.27131301	2430210
Sophora chrysophylla	SOCH	Tree, Shrub	61	2.5	3.8	-11.40323584	-4.444444444	6.958791396	13247.90039
Carex straminea	CAST6	Graminoid	62	-13.5	-11.4	-35.0497822	-33.33333333	1.71644887	1717170
Carex crus-corvi	CACR8	Graminoid	62	-11.8	-10.17	-33.13627878	-33.33333333	-0.19705455	1684000
Celtis pallida	CEPA8		62	-6.4	-1.085	-19.00280025	-19.44444444	-0.44164419	1192130
Carex lacustris	CALA16	Graminoid	63	-22.1	-14	-39.09458619	-33.33333333	5.76125286	2382180
Gaylussacia dumosa	GADU	Subshrub, Shrub	63	-11.8	-10.57	-33.75855632	-30.55555556	3.20300076	822479
Balsamorhiza serrata	BASE2	Forb/herb	63	-12.1	-9.97	-32.82514001	-33.33333333	-0.50819332	136184
Ceanothus fresnensis	CEFR	Subshrub, Shrub	63	-7.7	-6.6	-27.58245177	-30.55555556	-2.97310379	25484.09961
Pinus sylvestris	PISY	Tree	64	-18.1	-14.555	-39.95799627	-37.77777778	2.18021849	5243860
Carex typhina	CATY	Graminoid	64	-11.8	-9.97	-32.82514001	-33.33333333	-0.50819332	1279350
Muhlenbergia capillaris	MUCA2	Graminoid	64	-13.2	-8.4	-30.38270068	-13.88888889	16.49381179	3975130
Myoporum sandwicense	MYSA	Tree, Shrub	64	3.6	5.7	-8.447417548	4.444444444	12.89186199	12798.40039
Fraxinus nigra	FRNI	Tree	65	-18.2	-16	-42.20597386	-43.88888889	-1.68291503	1080050
Geum laciniatum	GELA	Forb/herb	65	-17.5	-13.42	-38.19228376	-30.55555556	7.6367282	1249060
Carex albolutescens	CAAL5	Graminoid	65	-8.9	-8.22	-30.10267579	-38.88888889	-8.7862131	1169850
Magnolia fraseri	MAFR	Tree	65	-9	-6.4	-27.27131301	-25	2.27131301	1641570
Saccharum giganteum	SAGI	Graminoid	65	-9.2	-5.48	-25.84007467	-33.33333333	-7.49325866	1765640
Nyssa biflora	NYBI	Tree	65	-6.4	-3.3	-22.4486621	-27.77777778	-5.32911568	1008090
Picea pungens	PIPU	Tree	66	-20.6	-18.1	-45.47293093	-38.88888889	6.58404204	2869050
Muhlenbergia glomerata	MUGL3	Graminoid	66	-22.1	-17.025	-43.80056005	-36.11111111	7.68944894	1930280
Hudsonia tomentosa	HUTO	Subshrub, Shrub	66	-22.6	-14.625	-40.06689484	-25	15.06689484	817754
Convallaria majalis	COMA7	Forb/herb	66	-14.2	-10.725	-33.99968886	-36.11111111	-2.11142225	2518440
Choisya dumosa	CHDU	Shrub	66	-6.5	-4.2	-23.84878656	-8.333333333	15.51545323	77290.39844
Larix occidentalis	LAOC	Tree	67	-15.9	-14.02	-39.12570006	-41.66666667	-2.54096661	283701
Ulmus parvifolia	ULPA	Tree	67	-10.8	-8.44	-30.44492844	-25	5.44492844	3378550
Commelina virginica	COVI3	Forb/herb	67	-7.9	-7.47	-28.93590541	-27.77777778	1.15812763	1390580
Paulownia tomentosa	PATO2	Tree	67	-14.5	-7.01	-28.22028625	-22.22222222	5.99806403	5052080
Acacia koa	ACKO	Tree	67	3.6	5.52	-8.727442439	-0.555555556	8.171886883	13510.5
Rosa rugosa	RORU	Subshrub	68	-30.3	-11.15	-34.66085874	-36.11111111	-1.45025237	4107350
Glyceria obtusa	GLOB	Graminoid	68	-12.7	-10.59	-33.78967019	-22.22222222	11.56744797	58402.5
Vernonia missurica	VEMI2	Forb/herb	68	-12.5	-10.495	-33.64187928	-36.11111111	-2.46923183	1380630
Sambucus nigra subsp cerula	SARAR3	Tree, Shrub	69	-14.6	-13.2	-37.85003111	-36.11111111	1.73892	1512600
Magnolia grandiflora	MAGR4	Tree	69	-18.1	-13.16	-37.78780336	-13.88888889	23.89891447	6925490
Iva frutescens	IVFR	Subshrub, Forb/herb	69	-9.7	-7.68	-29.26260112	-16.66666667	12.59593445	958690
Rhynchospora corniculata	RHCO2	Graminoid	69	-8.8	-6.72	-27.76913503	-25	2.76913503	1372960
Dasylirion wheeleri	DAWH2	Subshrub, Shrub	69	-10.5	-6.14	-26.86683261	-2.777777778	24.08905483	190510
Lathyrus hirsutus	LAHI2	Vine, Forb/herb	69	-9.5	-5.12	-25.28002489	-8.333333333	16.94669156	5152480
Poa autumnalis	POAU	Graminoid	69	-5.8	-4.84	-24.84443062	-22.22222222	2.6222084	707084
Carex tenera	CATE3	Graminoid	70	-21.6	-19.12	-47.05973864	-36.11111111	10.94862753	2624550
Eriogonum thymoides	ERTH4	Subshrub, Forb/herb	70	-14.3	-13.755	-38.71344119	-30.55555556	8.15788563	297693
Viburnum rafinesqueanum	VIRA	Shrub	70	-13.5	-11.965	-35.92874922	-41.66666667	-5.73791745	1105390
Acer pseudoplatanus	ACPS	Tree	70	-12.5	-10.31	-33.35407592	-30.55555556	2.79852036	4794560
Hilaria belangeri	HIBE	Graminoid	70	-11.4	-5.21	-25.42003734	-11.11111111	14.30892623	355899
Ranunculus pensylvanicus	RAPE2	Forb/herb	71	-29.9	-26.85	-60	-33.33333333	26.66666667	4884630
Commelina diffusa	CODI5	Forb/herb	71	-8.7	-8.3	-30.2271313	8.333333333	38.56046463	3203870
Ludwigia decurrens	LUDE4	Forb/herb	71	-7.7	-6.85	-27.97137523	-13.88888889	14.08248634	1514360
Vitis rotundifolia	VIRO3	Vine	71	-9.5	-6.15	-26.88238955	-27.77777778	-0.89538823	3396680
Eriocaulon decangulare	ERDE5	Forb/herb	71	-5.4	-5.25	-25.48226509	-22.22222222	3.26004287	891124
Alternanthera philoxeroides	ALPH	Forb/herb	71	-3.1	-2	-20.42626011	-19.44444444	0.98181567	2256480
Ammophila breviligulata	AMBR	Graminoid	72	-14.4	-13.38	-38.130056	-33.33333333	4.79672267	4451000
Ajuga reptans	AJRE	Forb/herb	72	-14.9	-11.135	-34.63752334	-30.55555556	4.08196778	4745270
Carex shortiana	CASH2	Graminoid	72	-11.8	-10.145	-33.09738643	-27.77777778	5.31960865	577211
Galium asprellum	GAAS2	Forb/herb	73	-19.6	-15.34	-41.17921593	-36.11111111	5.06810482	1416670
Phlox glaberrima	PHGL4	Forb/herb	73	-11.9	-10.8	-34.1163659	-33.33333333	0.78303257	1156270
Carex halliana	CAHA2	Graminoid	73	-19.7	-9.2	-31.62725576	-36.11111111	-4.48385535	572369
Muhlenbergia repens	MURE	Graminoid	74	-14.3	-11.2	-34.73864343	-8.333333333	26.4053101	1308960
Juncus brachycarpus	JUBR	Graminoid	74	-11.8	-8	-29.76042315	-30.55555556	-0.79513241	3774630
Cornus foemina	COFO	Tree, Shrub	74	-9	-5.875	-26.45457374	-19.44444444	7.0101293	1656490
Heuchera sanguinea	HESA3	Forb/herb	74	-10.8	-4.4	-24.15992533	-30.55555556	-6.39563023	908619
Sagittaria platyphylla	SAPL	Forb/herb	74	-11.6	-2.95	-21.90416926	-25	-3.09583074	3498870
Batis maritima	BAMA5	Subshrub	74	4.5	5.53	-8.711885501	-8.333333333	0.378552168	1526070
Eucephalus engelmannii	EUEN	Forb/herb, Subshrub	75	-20.4	-17.56	-44.63285625	-36.11111111	8.52174514	865689
Cornus rugosa	CORU	Tree, Shrub	75	-21.1	-15.76	-41.83260734	-33.33333333	8.49927401	890770
Carex torta	CATO4	Graminoid	75	-15.3	-11.86	-35.76540137	-36.11111111	-0.34570974	1045200
Lysimachia lanceolata	LYLA	Forb/herb	75	-15.5	-10.8	-34.1163659	-30.55555556	3.56081034	1687980
Fagopyrum esculentum	FAES2	Forb/herb	75	-15.3	-10.66	-33.89856876	4.444444444	38.3430132	7269770
Juglans regia	JURE80	Tree	75	-13.7	-9.56	-32.18730554	-22.22222222	9.96508332	5079920
Lathyrus littoralis	LALI2	Vine, Forb/herb	75	0	1.27	-15.33914126	-13.88888889	1.45025237	178426
Eriogonum niveum	ERNI2	Subshrub, Forb/herb	76	-11.4	-10.85	-34.19415059	-30.55555556	3.63859503	197708
Bidens discoidea	BIDI	Forb/herb	76	-13.5	-10.175	-33.14405725	11.11111111	44.25516836	1466940
Abies procera	ABPR	Tree	76	-9.3	-6.9	-28.04915993	-30.55555556	-2.50639563	176865
Syringa vulgaris	SYVU	Shrub	77	-19	-13.74	-38.69010579	-38.88888889	-0.1987831	5592590
Sorbus aucuparia	SOAU	Tree, Shrub	77	-15.3	-11.94	-35.88985688	-36.11111111	-0.22125423	4168420
Juncus secundus	JUSE	Graminoid	77	-15.1	-10.76	-34.05413815	-36.11111111	-2.05697296	1421340
Magnolia acuminata	MAAC	Tree	77	-14.3	-10.26	-33.27629123	-26.66666667	6.60962456	1223440
Agave utahensis	AGUT	Subshrub, Shrub, Forb/herb	77	-14.8	-9.3	-31.78282514	-30.55555556	1.22726958	247529
Platanus wrightii	PLWR2	Tree	77	-10.1	-6.56	-27.52022402	-22.22222222	5.2980018	397976
Hydrangea quercifolia	HYQU3	Shrub	77	-7.3	-6.4	-27.27131301	-19.44444444	7.82686857	1064550
Dryas drummondii	DRDR	Subshrub, Shrub, Forb/herb	78	-37.4	-34.33	-60	-41.66666667	18.33333333	1636980
Gaultheria hispidula	GAHI2	Subshrub, Shrub	78	-19.3	-18.015	-45.34069695	-33.33333333	12.00736362	231732
Cenchrus ciliaris	PECI	Graminoid	78	-5.4	-0.915	-18.7383323	-13.88888889	4.84944341	1796540
Artemisia tripartita	ARTR4	Shrub	79	-18.1	-16.7	-43.29495955	-41.66666667	1.62829288	1079550
Yucca elata	YUEL	Tree, Shrub	79	-8.4	-6.54	-27.48911014	-25	2.48911014	486290
Abies amabilis	ABAM	Tree	80	-11	-9.23	-31.67392657	-33.33333333	-1.65940676	1379020
Sporobolus heterolepis	SPHE	Graminoid	81	-20.1	-18.3	-45.7840697	-38.88888889	6.89518081	2316940
Oxydendrum arboreum	OXAR	Tree, Shrub	81	-11	-9.5	-32.09396391	-25	7.09396391	1369440
Prunus maritima	PRMA2	Shrub	82	-11.1	-9.16	-31.565028	-36.11111111	-4.54608311	30980
Crataegus viridis	CRVI2	Tree, Shrub	82	-10.2	-8.285	-30.20379589	-31.11111111	-0.90731522	1857540
Carex hyalinolepis	CAHY3	Graminoid	83	-12.8	-10.45	-33.57187306	-33.33333333	0.23853973	1972810
Cyperus pseudovegetus	CYPS	Graminoid	83	-7.3	-7.08	-28.32918482	-13.88888889	14.44029593	1532130
Gentiana andrewsii	GEAN	Forb/herb	84	-21.1	-17.225	-44.11169882	-38.88888889	5.22280993	1727630
Iris virginica	IRVI	Forb/herb	84	-12	-11.085	-34.55973864	-11.11111111	23.44862753	2070090
Limonium carolinianum	LICA17	Forb/herb	84	-14.7	-10.525	-33.68855009	-22.22222222	11.46632787	1031850
Muhlenbergia cuspidata	MUCU3	Graminoid	85	-21.5	-19.24	-47.2464219	-38.88888889	8.35753301	4655000
Sorbus americana	SOAM3	Tree, Shrub	85	-19.3	-17.7	-44.85065339	-38.88888889	5.9617645	1027810
Malus sylvestris	MASY2	Tree, Shrub	85	-15	-10.4	-33.49408836	-33.33333333	0.16075503	4562670
Tridens strictus	TRST2	Graminoid	85	-10.8	-8.04	-29.8226509	-47.22222222	-17.39957132	1362760
Paspalum vaginatum	PAVA	Graminoid	85	-7.4	4.4	-10.46981954	-9.444444444	1.025375096	998299
Juniperus horizontalis	JUHO2	Subshrub	86	-28.2	-22.725	-60	-41.66666667	18.33333333	4391600
Poa eminens	POEM	Graminoid	86	-24.3	-20.9	-49.82887368	-46.66666667	3.16220701	747248
Carex scabrata	CASC13	Graminoid	86	-18.1	-16.075	-42.3226509	-36.11111111	6.21153979	1177100
Cardamine douglassii	CADO	Forb/herb	86	-16.9	-11.3	-34.89421282	-36.11111111	-1.21689829	1404040
Ilex vomitoria	ILVO	Tree, Shrub	86	-9.2	-1.125	-19.065028	-13.88888889	5.17613911	3380960
Chloris gayana	CHGA2	Graminoid	86	-1.2	1.65	-14.7479776	-22.22222222	-7.47424462	1134020
Carex livida	CALI	Graminoid	87	-34.7	-32.74	-60	-52.22222222	7.77777778	5500040
Prunus pumila	PRPU3	Shrub	87	-19.4	-17.94	-45.22401991	-36.11111111	9.1129088	2957420
Halesia carolina	HACA3	Tree, Shrub	87	-9.5	-6.8	-27.89359054	-23.33333333	4.56025721	920042
Caesalpinia gilliesii	CAGI	Tree, Shrub, Vine	87	-7.6	-5.64	-26.08898569	-2.777777778	23.31120791	2645860
Pityopsis graminifolia	PIGR4	Forb/herb	87	-20.5	-4.47	-24.2688239	-19.44444444	4.82437946	2720850
Schinus terebinthifolius	SCTE	Tree, Shrub	87	-7.9	3.8	-11.40323584	-2.222222222	9.181013618	3662150
Tradescantia virginiana	TRVI	Forb/herb	88	-15.8	-11.2	-34.73864343	-38.88888889	-4.15024546	4410530
Lycopus rubellus	LYRU	Forb/herb	88	-13.4	-9.955	-32.8018046	-30.55555556	2.24624904	2165740
Galium oreganum	GAOR	Forb/herb	88	-12.3	-6.865	-27.99471064	-25	2.99471064	188895
Lomatium cous	LOCO4	Forb/herb	89	-18.1	-15.14	-40.86807716	-33.33333333	7.53474383	456085
Gentiana clausa	GECL	Forb/herb	89	-16.3	-11.98	-35.95208463	-38.88888889	-2.93680426	420368
Juncus dichotomus	JUDI	Graminoid	89	-11.8	-8.08	-29.88487866	-11.11111111	18.77376755	4497860
Achillea millefolium	ACMI2	Forb/herb	90	-39.6	-33.795	-60	-38.88888889	21.11111111	5733960
Glyceria melicaria	GLME2	Graminoid	90	-19.3	-16.865	-43.55164904	-36.11111111	7.44053793	462188
Mentzelia decapetala	MEDE2	Forb/herb	90	-18.1	-14.01	-39.11014312	-38.88888889	0.22125423	1231000
Setaria italica	SEIT	Graminoid	90	-13.7	-11.4	-35.0497822	11.11111111	46.16089331	4408540
Pinus taeda	PITA	Tree	90	-8	-5.485	-25.84785314	-22.22222222	3.62563092	2844850
Festuca trachyphylla	FETR3		91	-17	-12.85	-37.30553827	-38.88888889	-1.58335062	5377350
Vitis cinerea	VICI2	Vine	91	-10.8	-8.75	-30.92719353	-22.22222222	8.70497131	2328900
Pipturus albidus	PIAL2	Tree, Shrub	91	-8	5.65	-8.52520224	4.444444444	12.96964668	244828
Nolina microcarpa	NOMI	Subshrub, Shrub	92	-10.3	-8.815	-31.02831363	-10	21.02831363	315228
Panicum aciculare	DIAC	Graminoid	92	-13.2	-8.145	-29.98599876	-16.66666667	13.31933209	2551710
Pinus echinata	PIEC2	Tree	92	-9.1	-7.9	-29.60485376	-27.77777778	1.82707598	1706340
Pycreus polystachyos	CYPO	Graminoid	92	-6.7	-5.1	-25.24891101	8.333333333	33.58224434	2797950
Carex hendersonii	CAHE7	Graminoid	92	-8.8	-3.99	-23.52209085	-22.22222222	1.29986863	221293
Stenotaphrum secundatum	STSE	Graminoid	92	-6.1	1.155	-15.51804605	-16.66666667	-1.14862062	3024520
Liatris spicata	LISP	Forb/herb	93	-13.6	-10.54	-33.7118855	-27.77777778	5.93410772	2585440
Helianthus angustifolius	HEAN2	Forb/herb	93	-20.8	-5.74	-26.24455507	-33.33333333	-7.08877826	4490090
Oenothera elata subsp hookeri	OEELH2	Forb/herb	93	-9.9	-2.68	-21.48413192	-30.55555556	-9.07142364	286695
Acacia longifolia	ACLO	Tree, Shrub	93	-10.8	2.55	-13.34785314	-10	3.34785314	202641
Alisma gramineum	ALGR	Forb/herb	94	-22.1	-20.175	-48.70099564	-41.66666667	7.03432897	4060270
Geum rivale	GERI2	Forb/herb	94	-20.8	-15.575	-41.54480398	-36.11111111	5.43369287	2934700
Malus ioensis	MAIO	Tree, Shrub	94	-15.4	-11.17	-34.69197262	-33.33333333	1.35863929	432420
Penstemon acuminatus	PEAC	Forb/herb	94	-14.9	-10.2	-33.1829496	-36.11111111	-2.92816151	1601950
Lemna valdiviana	LEVA	Forb/herb	94	-11	-9.705	-32.41288114	-36.11111111	-3.69822997	4778550
Rudbeckia amplexicaulis	DRAM	Forb/herb	94	-7.9	-7.7	-29.293715	0	29.293715	1974130
Rhamnus alnifolia	RHAL	Shrub	95	-18.9	-17.16	-44.01057872	-36.11111111	7.89946761	3344360
Carex cristatella	CACR7	Graminoid	95	-19.3	-14.09	-39.23459863	-36.11111111	3.12348752	1709800
Scirpus pallidus	SCPA8	Graminoid	95	-18.2	-13.69	-38.6123211	-38.88888889	-0.27656779	2459700
Penstemon gairdneri	PEGA	Subshrub, Forb/herb	95	-12.5	-12.13	-36.18543871	-33.33333333	2.85210538	1094720
Pectis angustifolia	PEAN	Forb/herb	95	-14.5	-11.76	-35.60983199	-30.55555556	5.05427643	830404
Solidago patula	SOPA2	Forb/herb	95	-18.7	-11.73	-35.56316117	-41.66666667	-6.1035055	1577030
Rubus argutus	RUAR2	Subshrub	95	-17.1	-7.91	-29.6204107	-25	4.6204107	3647280
Andropogon ternarius	ANTE2	Graminoid	95	-7.3	-6.93	-28.09583074	-27.77777778	0.31805296	1613970
Arundinaria gigantea	ARGI	Subshrub, Shrub, Graminoid	95	-7.7	-5.58	-25.99564406	-30.55555556	-4.5599115	1645690
Carex bebbii	CABE2	Graminoid	96	-21.7	-18.9	-46.717486	-38.88888889	7.82859711	4334330
Bromus anomalus	BRAN	Graminoid	96	-21	-17.525	-44.57840697	-36.11111111	8.46729586	1577630
Juncus scirpoides	JUSC	Graminoid	96	-13.5	-13.05	-37.61667704	-19.44444444	18.1722326	2325780
Carex prasina	CAPR12	Graminoid	96	-13.5	-11.3	-34.89421282	-33.33333333	1.56087949	741268
Quercus phellos	QUPH	Tree	96	-11.8	-6.825	-27.93248289	-30.55555556	-2.62307267	3679800
Linum striatum	LIST	Forb/herb	97	-12.3	-9.5	-32.09396391	-41.66666667	-9.57270276	1310380
Kummerowia striata	KUST2	Forb/herb	97	-10.7	-8.06	-29.85376478	-13.33333333	16.52043145	3262230
Bolboschoenus robustus	SCRO5	Graminoid	97	-12	-7.3	-28.67143746	-13.88888889	14.78254857	4840000
Nerium oleander	NEOL	Tree, Shrub	97	-12.5	-4.52	-24.34660859	-10	14.34660859	4603630
Cyrilla racemiflora	CYRA	Tree, Shrub	97	-9.5	-0.14	-17.53266957	-21.11111111	-3.57844154	953780
Salix alba	SAAL2	Tree	98	-13.9	-11.845	-35.74206596	-36.11111111	-0.36904515	5592970
Salix brachycarpa	SABR	Shrub	99	-28.2	-19.92	-48.30429371	-29.44444444	18.85984927	1434380
Carex trisperma	CATR10	Graminoid	99	-18.9	-17.53	-44.58618544	-36.11111111	8.47507433	776179
Penstemon glaber	PEGL3	Subshrub, Forb/herb	99	-18.7	-17.1	-43.91723709	-38.88888889	5.0283482	1584610
Muhlenbergia uniflora	MUUN	Graminoid	99	-21.1	-15.81	-41.91039203	-36.11111111	5.79928092	1740300
Aristida divaricata	ARDI5	Graminoid	99	-12.2	-11.81	-35.68761668	-22.22222222	13.46539446	950322
Ligustrum vulgare	LIVU	Shrub	99	-11.3	-9.33	-31.82949596	-38.88888889	-7.05939293	5413310
Poa macrantha	POMA26	Graminoid	99	-8.9	-6.57	-27.53578096	-4.444444444	23.09133652	255006
Kochia americana	KOAM		101	-16.3	-13.1	-37.69446173	-36.11111111	1.58335062	961567
Geum vernum	GEVE	Forb/herb	101	-15.4	-10.4	-33.49408836	-27.77777778	5.71631058	1152570
Baptisia tinctoria	BATI	Forb/herb	101	-13.2	-10.3	-33.33851898	-16.66666667	16.67185231	619768
Solanum lycopersicum	SOLYL	Forb/herb	101	-15.1	-9.6	-32.24953329	0	32.24953329	6187920
Magnolia virginiana	MAVI2	Tree, Shrub	101	-9.5	-8.3	-30.2271313	-8.333333333	21.89379797	1698570
Pycreus flavescens	CYFL	Graminoid	101	-20.3	-7.7	-29.293715	5.555555556	34.84927056	5766280
Wyethia amplexicaulis	WYAM	Forb/herb	102	-18.4	-16.88	-43.57498444	-38.88888889	4.68609555	638130
Zizania aquatica	ZIAQ	Graminoid	102	-22.3	-15.945	-42.1204107	0	42.1204107	5601190
Stipa kingii	PTKI	Graminoid	102	-11.2	-10.5	-33.64965775	-30.55555556	3.09410219	42481.60156
Bromus sitchensis	BRSI	Graminoid	102	-17.5	-8.98	-31.28500311	-27.77777778	3.50722533	1220470
Balsamorhiza careyana	BACA3	Forb/herb	102	-9.8	-8.885	-31.1372122	-25	6.1372122	82906.79688
Rhododendron tomentosum	LEPA11	Shrub	103	-38.2	-35.29	-60	-52.22222222	7.77777778	1416700
Tetradymia spinosa	TESP2	Subshrub, Shrub	103	-16.2	-14.5	-39.87243311	-33.33333333	6.53909978	1048530
Callitriche hermaphroditica	CAHE2	Forb/herb	104	-35.2	-32.87	-60	-36.11111111	23.88888889	7293320
Arnica fulgens	ARFU3	Forb/herb	105	-21	-19.92	-48.30429371	-33.33333333	14.97096038	1763750
Lonicera tatarica	LOTA	Shrub	105	-26.9	-19.1	-47.02862477	-38.88888889	8.13973588	4806530
Persicaria maculosa	POPE3	Forb/herb	105	-32.8	-14.24	-39.46795271	0	39.46795271	5761360
Rhus microphylla	RHMI3	Tree, Shrub	105	-9.4	-6.44	-27.33354076	-25	2.33354076	491570
Acacia constricta	ACCO2	Tree, Shrub	105	-9.7	-4.1	-23.69321717	-25	-1.30678283	442128
Alnus incana subsp rugosa	ALINR	Tree, Shrub	106	-21.6	-26.6	-60	-43.88888889	16.11111111	809378
Festuca thurberi	FETH	Graminoid	106	-21	-20.025	-48.46764157	-36.11111111	12.35653046	815214
Stenotus armerioides	STARA	Subshrub, Forb/herb	106	-21.1	-19.15	-47.10640946	-30.55555556	16.5508539	906578
Spartina alterniflora	SPAL	Graminoid	106	-11.9	-10.475	-33.6107654	-30.55555556	3.05520984	6698280
Ulmus alata	ULAL	Tree	106	-7.9	-7.275	-28.63254512	-27.77777778	0.85476734	2857870
Salix polaris	SAPO	Subshrub, Shrub	108	-38	-33.7	-60	-52.22222222	7.77777778	1242100
Bromus kalmii	BRKA2	Graminoid	108	-22.1	-11.965	-35.92874922	-36.11111111	-0.18236189	3528330
Baccharis halimifolia	BAHA	Tree, Shrub	108	-7.3	-7.2	-28.51586808	-19.44444444	9.07142364	1101520
Rhododendron canescens	RHCA7	Shrub	109	-17	-12	-35.98319851	-25	10.98319851	4459640
Agrimonia rostellata	AGRO3	Forb/herb	109	-10.8	-9.5	-32.09396391	-36.11111111	-4.0171472	1448890
Quercus nigra	QUNI	Tree	109	-8	-5.04	-25.15556938	-28.88888889	-3.73331951	3783860
Danthonia compressa	DACO	Graminoid	110	-17.6	-13.36	-38.09894213	-36.11111111	1.98783102	501470
Ambrosia monogyra	HYMO	Subshrub, Shrub	111	-6.7	-5.05	-25.17112632	-2.777777778	22.39334854	311208
Artemisia tridentata subsp wyo	ARTRW8	Tree, Shrub	112	-20.6	-17.445	-44.45395146	-36.11111111	8.34284035	1613960
Spartina patens	SPPA	Graminoid	112	-15.9	-10.645	-33.87523335	-19.44444444	14.43078891	5990960
Bothriochloa ischaemum	BOISI	Graminoid	112	-11.2	-10.4	-33.49408836	-19.44444444	14.04964392	3055060
Catalpa bignonioides	CABI8	Tree	112	-13.5	-10.145	-33.09738643	-27.77777778	5.31960865	6095380
Albizia julibrissin	ALJU	Tree, Shrub	112	-10.3	-7.445	-28.89701307	-16.66666667	12.2303464	4745020
Elaeagnus commutata	ELCO	Shrub	113	-33.6	-30.24	-60	-38.88888889	21.11111111	3234400
Salix sessilifolia	SASE3	Tree, Shrub	113	-9.7	-0.54	-18.15494711	-36.11111111	-17.956164	652762
Pinus resinosa	PIRE	Tree	114	-23.1	-17.1	-43.91723709	-41.66666667	2.25057042	1240480
Taxus canadensis	TACA7	Shrub	114	-19.1	-15.2	-40.96141879	-33.33333333	7.62808546	743805
Morella pensylvanica	MOPE6	Tree, Shrub	114	-11.3	-9.5	-32.09396391	-33.33333333	-1.23936942	1100570
Berlandiera lyrata	BELY	Forb/herb	114	-10.8	-8.605	-30.70161792	-30.55555556	0.14606236	516660
Muhlenbergia wrightii	MUWR	Graminoid	115	-20.4	-14.53	-39.91910392	-27.77777778	12.14132614	693264
Aralia spinosa	ARSP2	Tree, Shrub	115	-15	-9.4	-31.93839452	-31.66666667	0.27172785	2981460
Stachys palustris	STPA	Forb/herb	116	-29.9	-19.15	-47.10640946	-38.88888889	8.21752057	6705380
Acer grandidentatum	ACGR3	Tree, Shrub	116	-16.6	-14.625	-40.06689484	-35	5.06689484	1597050
Ilex glabra	ILGL	Shrub	116	-12.3	-8.2	-30.07156192	-25	5.07156192	1265990
Rhamnus caroliniana	FRCA13	Tree, Shrub	116	-7.9	-7.9	-29.60485376	-32.77777778	-3.17292402	2970040
Trifolium subterraneum	TRSU3	Forb/herb	116	-5.8	-0.225	-17.66490355	-15	2.66490355	2543320
Antennaria anaphaloides	ANAN2	Forb/herb	117	-20.5	-17.9	-45.16179216	-36.11111111	9.05068105	992884
Vernonia noveboracensis	VENO	Forb/herb	117	-10.6	-9.6	-32.24953329	-36.11111111	-3.86157782	1064520
Smilax bona-nox	SMBO2	Shrub, Vine	117	-8.8	-7.02	-28.23584319	-27.77777778	0.45806541	2041600
Najas minor	NAMI	Forb/herb	118	-16.6	-11.815	-35.69539515	8.333333333	44.02872848	4468140
Solidago sempervirens	SOSE	Forb/herb	118	-11.9	-10.615	-33.82856254	-25	8.82856254	1482830
Rorippa sessiliflora	ROSE	Forb/herb	118	-11.8	-10.145	-33.09738643	11.11111111	44.20849754	1821560
Tillandsia usneoides	TIUS	Forb/herb, Vine	118	-1.9	0.585	-16.40479154	-5.555555556	10.84923598	2647000
Betula pendula	BEPE3	Tree	119	-35.3	-33.51	-60	-36.11111111	23.88888889	4613350
Lysimachia thyrsiflora	LYTH2	Forb/herb	119	-32.9	-32.6	-60	-36.11111111	23.88888889	4218100
Poa sylvestris	POSY	Graminoid	119	-10.9	-10.01	-32.88736777	-36.11111111	-3.22374334	1246330
Carex mariposana	CAMA13	Graminoid	119	-11.2	-10	-32.87181083	-25	7.87181083	196451
Juncus triglumis	JUTR4	Graminoid	120	-38.2	-35.62	-60	-30.55555556	29.44444444	2395880
Valeriana occidentalis	VAOC2	Forb/herb	120	-21.8	-20.115	-48.60765401	-33.33333333	15.27432068	913038
Rhododendron canadense	RHCA6	Shrub	120	-19.1	-17.305	-44.23615432	-30.55555556	13.68059876	1377590
Carex atherodes	CAAT2	Graminoid	121	-33.5	-30.1	-60	-38.88888889	21.11111111	3794780
Amelanchier laevis	AMLA	Tree, Shrub	121	-18.1	-17	-43.7616677	-38.88888889	4.87277881	2447940
Rhododendron maximum	RHMA4	Tree, Shrub	121	-16.1	-12.9	-37.38332296	-25	12.38332296	2413610
Carya illinoinensis	CAIL2	Tree	121	-10.3	-8.5	-30.53827007	-29.44444444	1.09382563	5144360
Pinus virginiana	PIVI2	Tree	121	-10.1	-8	-29.76042315	-30.55555556	-0.79513241	1434810
Poa leibergii	POLE	Graminoid	122	-34.9	-33.5	-60	-30.55555556	29.44444444	1063840
Kummerowia stipulacea	KUST	Forb/herb	122	-14.6	-9.765	-32.50622278	-14.44444444	18.06177834	1676670
Vitis vulpina	VIVU	Vine	122	-19.2	-9.485	-32.0706285	-30.55555556	1.51507294	3787880
Garrya wrightii	GAWR3	Shrub, Tree	122	-10.5	-8.685	-30.82607343	-11.11111111	19.71496232	236481
Packera glabella	PAGL17	Forb/herb	123	-10	-8.7	-30.84940884	0	30.84940884	1737440
Muhlenbergia pungens	MUPU2	Graminoid	124	-17.9	-15.695	-41.73148724	-30.55555556	11.17593168	822308
Rorippa sylvestris	ROSY	Forb/herb	124	-16.6	-11.385	-35.0264468	-33.33333333	1.69311347	6734100
Pinus radiata	PIRA2	Tree	124	-8	2.2	-13.89234599	-5	8.89234599	1251400
Lupinus nootkatensis	LUNO	Forb/herb	125	-32.1	-23.02	-60	-37.22222222	22.77777778	598582
Rhododendron albiflorum	RHAL2	Shrub	125	-15.4	-15.32	-41.14810205	-13.88888889	27.25921316	658969
Carex bicknellii	CABI3	Graminoid	125	-18.5	-11.26	-34.83198507	-38.88888889	-4.05690382	1579750
Quercus michauxii	QUMI	Tree	125	-15.6	-10.92	-34.30304916	-28.88888889	5.41416027	4592770
Lomatium canbyi	LOCA4	Forb/herb	125	-14.1	-9.78	-32.52955818	-33.33333333	-0.80377515	464897
Smilax glauca	SMGL	Shrub, Vine	125	-11.6	-9.48	-32.06285003	-25	7.06285003	4435780
Rosa eglanteria	ROEG		125	-11.8	-9.2	-31.62725576	-36.11111111	-4.48385535	4597580
Senecio hydrophiloides	SEHY	Forb/herb	126	-18.9	-14.05	-39.17237088	-33.33333333	5.83903755	1502010
Corydalis flavula	COFL3	Forb/herb	126	-11.8	-8.3	-30.2271313	-27.77777778	2.44935352	1430360
Anisacanthus thurberi	ANTH2	Shrub	126	-11.4	-4.375	-24.12103298	-19.44444444	4.67658854	136430
Agropyron desertorum	AGDE2	Graminoid	127	-17.9	-14.18	-39.37461108	-41.66666667	-2.29205559	4199820
Muhlenbergia sylvatica	MUSY	Graminoid	127	-14.7	-11	-34.42750467	-33.33333333	1.09417134	1368460
Crataegus monogyna	CRMO3	Tree, Shrub	127	-13.9	-9.6	-32.24953329	-30.55555556	1.69397773	4026430
Chionanthus virginicus	CHVI3	Tree, Shrub	127	-10.3	-8.04	-29.8226509	-34.44444444	-4.62179354	4069200
Morella cerifera	MOCE2	Tree, Subshrub, Shrub	127	-9.5	-4.6	-24.47106409	-19.44444444	5.02661965	7029560
Carex diandra	CADI4	Graminoid	128	-35.9	-32.73	-60	-36.11111111	23.88888889	5269000
Senna marilandica	SEMA11	Subshrub, Forb/herb	128	-11.6	-9.065	-31.41723709	-27.77777778	3.63945931	2591300
Chrysolepis chrysophylla	CHCHC4	Tree	128	-8.4	-7.095	-28.35252022	-36.66666667	-8.31414645	236059
Lathyrus polyphyllus	LAPO3	Vine, Forb/herb	128	-7	-5.33	-25.6067206	-16.66666667	8.94005393	396001
Lycopus asper	LYAS	Forb/herb	129	-32.3	-20.72	-49.54884879	-38.88888889	10.6599599	4236630
Packera tridenticulata	PATR7	Forb/herb, Subshrub	129	-21.8	-16.78	-43.41941506	-30.55555556	12.8638595	379554
Penstemon venustus	PEVE2	Subshrub, Shrub, Forb/herb	129	-16.3	-14.9	-40.49471064	-27.77777778	12.71693286	382144
Rosa virginiana	ROVI2	Subshrub	129	-15.3	-12.56	-36.85438706	-27.77777778	9.07660928	703333
Corydalis caseana	COCA15	Forb/herb	130	-20.4	-20.01	-48.44430616	-43.33333333	5.11097283	1027650
Abies balsamea	ABBA	Tree	130	-22.1	-17.3	-44.22837586	-41.66666667	2.56170919	3115700
Nelumbo lutea	NELU	Forb/herb	130	-17.9	-11.265	-34.83976353	-37.77777778	-2.93801425	5424620
Carex amphibola	CAAM8	Graminoid	130	-14.2	-10.655	-33.89079029	-19.44444444	14.44634585	1924990
Lupinus luteolus	LULU2	Forb/herb	130	-8.1	-6.14	-26.86683261	11.11111111	37.97794372	191553
Potamogeton praelongus	POPR5	Forb/herb	131	-36.7	-32.6	-60	-38.88888889	21.11111111	4809350
Picea rubens	PIRU	Tree	131	-17.5	-16.05	-42.28375856	-43.88888889	-1.60513033	1417890
Primula meadia	DOME	Forb/herb	131	-15.9	-12.9	-37.38332296	-38.88888889	-1.50556593	2065650
Ranunculus hyperboreus	RAHY2	Forb/herb	132	-39.6	-34.145	-60	-52.22222222	7.77777778	2520860
Eurybia macrophylla	EUMA27	Forb/herb	132	-22.6	-17.29	-44.21281892	-33.33333333	10.87948559	1415400
Cordylanthus ramosus	CORA5	Forb/herb	132	-19.8	-15.5	-41.42812694	11.11111111	52.53923805	992804
Geranium oreganum	GEOR2	Forb/herb	133	-15.6	-12.56	-36.85438706	-13.88888889	22.96549817	1122270
Cabomba caroliniana	CACA	Forb/herb	133	-13.2	-10.6	-33.80522713	-30.55555556	3.24967157	5696670
Quercus falcata	QUFA	Tree	133	-9	-6.44	-27.33354076	-25	2.33354076	1319820
Metrosideros polymorpha	MEPO5	Tree, Shrub	133	2.5	8.06	-4.775980087	-5.555555556	-0.779575469	14322.2998
Vitis aestivalis	VIAE	Vine	134	-14.2	-10.535	-33.70410703	-30.55555556	3.14855147	4459420
Carex squarrosa	CASQ2	Graminoid	134	-11.8	-10.1	-33.02738021	-33.33333333	-0.30595312	1244640
Pyrus communis	PYCO	Tree	134	-11	-9.5	-32.09396391	-27.77777778	4.31618613	6136170
Hilaria mutica	PLMU3	Graminoid	134	-7.4	-5.5	-25.87118855	-16.66666667	9.20452188	684907
Epilobium leptophyllum	EPLE2	Forb/herb	135	-28.1	-19.87	-48.22650902	-36.11111111	12.11539791	4901660
Agrimonia striata	AGST	Forb/herb	135	-21	-16.8	-43.45052894	-41.66666667	1.78386227	3380040
Salix sericea	SASE	Tree, Shrub	135	-16.2	-12.89	-37.36776602	-33.33333333	4.03443269	1185990
Oenothera fruticosa	OEFR	Forb/herb	135	-15.1	-8.7	-30.84940884	-36.11111111	-5.26170227	1884760
Rhododendron lapponicum	RHLA2	Shrub	136	-39.6	-36.05	-60	-52.22222222	7.77777778	1940410
Juncus nodosus	JUNO2	Graminoid	136	-21.9	-20.9	-49.82887368	-33.33333333	16.49554035	5769840
Melica spectabilis	MESP	Graminoid	136	-21.4	-20.4	-49.05102676	-36.11111111	12.93991565	1400680
Iliamna rivularis	ILRI	Subshrub, Forb/herb	136	-19.7	-17.7	-44.85065339	-36.11111111	8.73954228	1917820
Ratibida tagetes	RATA	Forb/herb	136	-12.2	-11.9	-35.82762912	-33.33333333	2.49429579	750605
Hypericum prolificum	HYPR	Shrub, Subshrub	136	-12	-10.625	-33.84411948	-33.33333333	0.51078615	1522700
Botrychium lanceolatum	BOLA	Forb/herb	137	-28.3	-22.3	-60	-36.11111111	23.88888889	4655680
Quercus coccinea	QUCO2	Tree	137	-14.7	-10.82	-34.14747978	-33.33333333	0.81414645	2787340
Gaylussacia frondosa	GAFR2	Shrub	137	-14.4	-10.74	-34.02302427	-30.55555556	3.46746871	720262
Paspalum laeve	PALA10	Graminoid	137	-10.6	-8.04	-29.8226509	-25	4.8226509	2028340
Botrychium lunaria	BOLU	Forb/herb	138	-38.2	-34.335	-60	-36.11111111	23.88888889	5031170
Penstemon confertus	PECO6	Subshrub, Forb/herb	138	-18.4	-14.03	-39.141257	-30.55555556	8.58570144	1549660
Eleocharis ovata	ELOV	Graminoid	138	-19.4	-13.56	-38.4100809	8.333333333	46.74341423	7357220
Hibiscus laevis	HILA2	Forb/herb	138	-13.9	-10.115	-33.05071562	-25	8.05071562	3865910
Vicia cracca	VICR	Vine, Forb/herb	139	-30.1	-26.54	-60	-36.11111111	23.88888889	6584370
Canadanthus modestus	CAMO32	Forb/herb	139	-17.7	-14.7	-40.18357187	-38.88888889	1.29468298	618872
Chamaecyparis thyoides	CHTH2	Tree	139	-13.1	-11.21	-34.75420037	-37.77777778	-3.02357741	3133880
Chasmanthium laxum	CHLA6	Graminoid	139	-10.1	-4.8	-24.78220286	-36.11111111	-11.32890825	1714150
Vinca minor	VIMI2	Vine, Forb/herb	141	-15.3	-14.3	-39.56129434	-36.11111111	3.45018323	6037190
Carex sparganioides	CASP3	Graminoid	141	-17	-13.6	-38.47230865	-36.11111111	2.36119754	1753310
Quercus imbricaria	QUIM	Tree	141	-11.8	-10.8	-34.1163659	-27.77777778	6.33858812	2822970
Stellaria umbellata	STUM	Forb/herb	142	-38	-32.79	-60	-33.33333333	26.66666667	2991960
Deschampsia flexuosa	DEFL	Graminoid	142	-19.1	-16.7	-43.29495955	-38.88888889	4.40607066	1219870
Ehrharta calycina	EHCA	Graminoid	142	-0.2	1.8	-14.51462352	-8.333333333	6.181290187	112405
Tragopogon pratensis	TRPR		143	-21.4	-16.55	-43.06160548	-36.11111111	6.95049437	4631250
Eleocharis compressa	ELCO2	Graminoid	143	-21.1	-12.3	-36.44990666	-36.11111111	0.33879555	3317180
Lonicera maackii	LOMA6	Shrub	143	-15.2	-10.78	-34.08525202	-36.11111111	-2.02585909	4517260
Stachys tenuifolia	STTE	Forb/herb	143	-15.2	-10.54	-33.7118855	-36.11111111	-2.39922561	1615540
Panicum scoparium	DISC3	Graminoid	143	-7.4	-6.49	-27.41132545	-38.88888889	-11.47756344	1875900
Callicarpa americana	CAAM2	Shrub	143	-5.6	-2.99	-21.96639701	-22.22222222	-0.25582521	2677800
Juncus biglumis	JUBI2	Graminoid	144	-39	-35.685	-60	-38.88888889	21.11111111	2104040
Geranium erianthum	GEER2	Forb/herb	144	-30.8	-26.445	-60	-28.88888889	31.11111111	1801540
Helianthus nuttallii	HENU	Forb/herb	144	-21.5	-17.585	-44.6717486	-38.88888889	5.78285971	3109680
Picea mariana	PIMA	Tree	145	-35.6	-33.2	-60	-61.66666667	-1.66666667	4767600
Salix discolor	SADI	Tree, Shrub	145	-21.9	-16.56	-43.07716241	-36.11111111	6.9660513	2605520
Potamogeton robbinsii	PORO2	Forb/herb	145	-26.6	-15.24	-41.02364655	-38.88888889	2.13475766	4436720
Solidago uliginosa	SOULU	Forb/herb	145	-21	-14.82	-40.37025513	-30.55555556	9.81469957	805676
Fendlera rupicola	FERU	Shrub	145	-15.3	-12.16	-36.23210952	-25	11.23210952	616515
Rosa setigera	ROSE2	Vine, Subshrub	145	-13.9	-10	-32.87181083	-25	7.87181083	1645140
Salix caroliniana	SACA5	Tree	145	-10.5	-8.3	-30.2271313	-16.66666667	13.56046463	2586300
Diervilla lonicera	DILO	Shrub	146	-20.8	-17.95	-45.23957685	-30.55555556	14.68402129	1086180
Lonicera utahensis	LOUT2	Shrub	146	-18.2	-15.55	-41.50591164	-30.55555556	10.95035608	1182840
Betula nigra	BENI	Tree	146	-18.1	-10.175	-33.14405725	-35	-1.85594275	2395870
Ilex decidua	ILDE	Tree, Shrub	146	-18.8	-7.975	-29.7215308	-27.77777778	1.94375302	2406420
Aesculus pavia	AEPA	Tree, Shrub	146	-9.5	-7.175	-28.47697573	-28.88888889	-0.41191316	4006170
Picea breweriana	PIBR	Tree	146	-8	-6.5	-27.42688239	-25	2.42688239	307880
Salix drummondiana	SADR	Shrub	147	-21	-18.14	-45.53515868	-33.33333333	12.20182535	1474550
Penstemon wilcoxii	PEWI	Subshrub, Forb/herb	147	-18.8	-16.54	-43.04604854	-36.11111111	6.93493743	416367
Physocarpus malvaceus	PHMA5	Shrub	147	-20	-15.88	-42.0192906	-36.11111111	5.90817949	871889
Betula populifolia	BEPO	Tree	147	-18.7	-15.1	-40.80584941	-37.22222222	3.58362719	3707580
Rubus hispidus	RUHI	Subshrub	147	-15.5	-11.87	-35.78095831	-38.88888889	-3.10793058	1464620
Melia azedarach	MEAZ	Tree, Shrub	147	-6.4	-2.2	-20.73739888	-8.333333333	12.40406555	4307810
Sporobolus flexuosus	SPFL2	Graminoid	148	-11.8	-9.13	-31.51835719	-19.44444444	12.07391275	1257330
Oryzopsis micrantha	PIMI7		149	-21.8	-18.84	-46.62414437	-38.88888889	7.73525548	2495950
Calamovilfa longifolia	CALO	Graminoid	149	-20.1	-18.36	-45.87741133	-38.88888889	6.98852244	2687890
Stipa spartea	HESP11	Graminoid	149	-19.7	-14.88	-40.46359676	-38.88888889	1.57470787	1574750
Carex gracillima	CAGR2	Graminoid	149	-18.7	-13.38	-38.130056	-36.11111111	2.01894489	1341920
Salix hastata	SAHA	Shrub	150	-39.6	-35.6	-60	-52.22222222	7.77777778	972977
Campanula aparinoides	CAAP2	Forb/herb	150	-22.2	-15.365	-41.21810828	-38.88888889	2.32921939	2097320
Vallisneria americana	VAAM3	Forb/herb	150	-20.2	-13.075	-37.65556938	-36.11111111	1.54445827	7708380
Potamogeton zosteriformis	POZO	Forb/herb	151	-33.2	-30.95	-60	-38.88888889	21.11111111	4997900
Thuja occidentalis	THOC2	Tree	151	-23.9	-17.85	-45.08400747	-36.11111111	8.97289636	3066530
Juncus canadensis	JUCA3	Graminoid	151	-18.7	-13.3	-38.0056005	-36.11111111	1.89448939	5431280
Scirpus georgianus	SCGE2	Graminoid	151	-13.5	-10.05	-32.94959552	-38.88888889	-5.93929337	1551310
Vaccinium arboreum	VAAR	Tree, Shrub	151	-8.5	-7.3	-28.67143746	-25	3.67143746	2036220
Eragrostis lehmanniana	ERLE	Graminoid	151	-17.5	-3.15	-22.21530803	-13.33333333	8.8819747	1271520
Iris tenax	IRTE	Forb/herb	151	-8.2	-2.2	-20.73739888	-25	-4.26260112	355617
Prunus pensylvanica	PRPE2	Tree, Shrub	152	-19.1	-16.135	-42.41599253	-38.88888889	3.52710364	4013810
Desmodium perplexum	DEPE80	Forb/herb	153	-12.4	-10.04	-32.93403858	-36.11111111	-3.17707253	1699450
Lonicera sempervirens	LOSE	Vine	153	-11	-9.32	-31.81393902	-36.11111111	-4.29717209	3162040
Angelica arguta	ANAR3	Forb/herb	154	-18.9	-14.635	-40.08245177	-27.77777778	12.30467399	779217
Lupinus sulphureus	LUSU5	Forb/herb	154	-18.5	-10.675	-33.92190417	-36.11111111	-2.18920694	412290
Sequoiadendron giganteum	SEGI2	Tree	154	-12.5	-6.605	-27.59023024	-31.11111111	-3.52088087	3359150
Antennaria corymbosa	ANCO	Forb/herb	155	-21	-20.13	-48.63098942	-27.77777778	20.85321164	1323650
Festuca arizonica	FEAR2	Graminoid	155	-21.1	-18.7	-46.40634723	-30.55555556	15.85079167	461242
Populus grandidentata	POGR4	Tree	155	-17.8	-16.16	-42.45488488	-41.66666667	0.78821821	1404930
Calamagrostis rubescens	CARU	Graminoid	155	-21	-15.43	-41.31922838	-33.33333333	7.98589505	1583480
Oenothera flava	OEFL	Forb/herb	156	-18.6	-16.3	-42.67268202	-36.11111111	6.56157091	1385090
Crepis modocensis	CRMO4	Forb/herb	156	-20.5	-15.4	-41.27255756	-33.33333333	7.93922423	1166440
Carex molesta	CAMO11	Graminoid	156	-19.7	-13.7	-38.62787803	-38.88888889	-0.26101086	2077780
Olneya tesota	OLTE	Tree, Shrub	157	1.2	2.1	-14.04791537	-5.555555556	8.492359814	96941.39844
Arctous alpina	ARAL2	Shrub	158	-39.6	-36.615	-60	-52.22222222	7.77777778	1725450
Carex viridula	CAVI5	Graminoid	158	-33	-24.4	-60	-38.88888889	21.11111111	5594320
Galium obtusum	GAOB	Forb/herb	158	-18	-12.49	-36.74548849	-36.11111111	0.63437738	2565380
Carex atlantica	CAAT4	Graminoid	158	-14.5	-11.7	-35.51649035	-27.77777778	7.73871257	2004810
Carex grayi	CAGR5	Graminoid	158	-20.2	-11.445	-35.11978843	-36.11111111	-0.99132268	2321880
Viburnum opulus	VIOP	Tree, Shrub	159	-19.5	-16.04	-42.26820162	-38.88888889	3.37931273	3984370
Quercus bicolor	QUBI	Tree	159	-22.8	-13.5	-38.31673927	-33.33333333	4.98340594	1923070
Agrimonia parviflora	AGPA6	Forb/herb	159	-13.5	-10.61	-33.82078407	-36.11111111	-2.29032704	1555770
Coreopsis lanceolata	COLA5	Forb/herb	159	-12.8	-10.11	-33.04293715	-22.22222222	10.82071493	5975190
Prunus angustifolia	PRAN3	Tree, Shrub	159	-10.2	-9.11	-31.48724331	-33.33333333	-1.84609002	2900350
Itea virginica	ITVI	Shrub	159	-6.4	-5	-25.09334163	-31.11111111	-6.01776948	1426320
Spartina gracilis	SPGR	Graminoid	160	-21.5	-17.91	-45.1773491	-38.88888889	6.28846021	2384830
Spiraea tomentosa	SPTO2	Shrub	160	-17.6	-15.105	-40.81362788	-36.11111111	4.70251677	3724070
Ammophila arenaria	AMAR4	Graminoid	160	-12.8	0.5	-16.53702551	-13.88888889	2.64813662	4038990
Poa nervosa	PONE2	Graminoid	161	-18.9	-14.8	-40.33914126	-27.77777778	12.56136348	1571930
Acer glabrum	ACGL	Tree, Shrub	161	-17.1	-14.7	-40.18357187	-41.66666667	-1.4830948	622179
Silphium perfoliatum	SIPE2	Forb/herb	161	-18	-14.3	-39.56129434	-45	-5.43870566	1841970
Ceanothus sanguineus	CESA	Shrub	161	-19.8	-10	-32.87181083	-25	7.87181083	1074050
Utricularia minor	UTMI	Forb/herb	162	-39.6	-31.1	-60	-41.66666667	18.33333333	6078630
Osmorhiza depauperata	OSDE	Forb/herb	162	-30	-19.895	-48.26540137	-36.11111111	12.15429026	4675830
Decodon verticillatus	DEVE	Subshrub, Shrub	162	-17.9	-12.285	-36.42657125	-30.55555556	5.87101569	2079300
Juglans major	JUMA	Tree	162	-10.5	-9.295	-31.77504667	-36.11111111	-4.33606444	580819
Nemophila maculata	NEMA	Forb/herb	162	-8.6	-7.4	-28.82700685	11.11111111	39.93811796	145519
Eriophorum virginicum	ERVI8	Graminoid	163	-18.9	-15.6	-41.58369633	-36.11111111	5.47258522	1440780
Viburnum lentago	VILE	Tree, Shrub	163	-19.8	-13.43	-38.2078407	-36.11111111	2.09672959	3090640
Rosa palustris	ROPA	Subshrub	163	-17.9	-11.68	-35.48537648	-36.11111111	-0.62573463	1951680
Camassia scilloides	CASC5	Forb/herb	163	-11.8	-10.2	-33.1829496	-33.33333333	-0.15038373	1736190
Glyceria canadensis	GLCA	Graminoid	164	-18.4	-16.54	-43.04604854	-36.11111111	6.93493743	2466450
Rubus idaeus subsp strigosus	RUIDS2	Subshrub	164	-21.9	-15.355	-41.20255134	-52.22222222	-11.01967088	4468800
Andropogon hallii	ANHA	Graminoid	164	-20.3	-13.485	-38.29340386	-38.88888889	-0.59548503	1698230
Dodonaea viscosa	DOVI	Tree, Shrub	164	-8	-0.17	-17.57934039	-7.777777778	9.801562612	3164840
Picea glauca	PIGL	Tree	165	-36.2	-33.88	-60	-53.88888889	6.11111111	5408120
Comptonia peregrina	COPE80	Subshrub, Shrub	165	-20.2	-14.7	-40.18357187	-38.88888889	1.29468298	1089160
Populus alba	POAL7	Tree	165	-15.7	-11.38	-35.01866833	-38.88888889	-3.87022056	6659180
Lespedeza hirta	LEHI2	Forb/herb	165	-12.4	-10.3	-33.33851898	-25	8.33851898	1886570
Ribes triste	RITR	Shrub	166	-39.6	-34.65	-60	-52.22222222	7.77777778	2775930
Dryopteris cristata	DRCR4	Forb/herb	166	-19.3	-13.75	-38.70566273	-36.11111111	2.59455162	2035690
Eragrostis trichodes	ERTR3	Graminoid	166	-15.8	-13.3	-38.0056005	-30.55555556	7.45004494	2332870
Salix prolixa	SAPR3	Tree, Shrub	166	-15.9	-13.175	-37.81113877	-45.55555556	-7.74441679	1497490
Mimulus alatus	MIAL2	Forb/herb	166	-10.4	-8.85	-31.08276291	-30.55555556	0.52720735	1195570
Prosopis pubescens	PRPU	Tree, Shrub	167	-6.1	-4.4	-24.15992533	-19.44444444	4.71548089	599682
Eucalyptus camaldulensis	EUCA2	Tree	167	-5.8	-0.61	-18.26384568	-8.333333333	9.930512347	419841
Salix lucida	SALU	Tree, Shrub	168	-21.8	-16.765	-43.39607965	-41.66666667	1.72941298	5274910
Acer platanoides	ACPL	Tree	168	-15.2	-14.9	-40.49471064	-33.33333333	7.16137731	4581400
Trifolium fragiferum	TRFR2	Forb/herb	168	-14.9	-12.5	-36.76104543	-40	-3.23895457	4108320
Viburnum dentatum	VIDED4	Tree, Shrub	168	-14	-11.195	-34.73086497	-31.11111111	3.61975386	2573190
Helianthella uniflora	HEUN	Forb/herb	169	-19.3	-16.92	-43.6372122	-30.55555556	13.08165664	991917
Rubus odoratus	RUOD	Subshrub	169	-15.7	-15.1	-40.80584941	-38.88888889	1.91696052	890883
Panicum latifolium	DILA8	Graminoid	169	-15.4	-11.18	-34.70752956	-41.66666667	-6.95913711	2637170
Catalpa speciosa	CASP8	Tree	169	-13.7	-10.3	-33.33851898	-38.88888889	-5.55036991	5344840
Boechera holboellii	ARHO2	Forb/herb	170	-34.5	-26.955	-60	-36.11111111	23.88888889	4463810
Sphaeralcea munroana	SPMU2	Subshrub, Forb/herb	170	-16.7	-15.555	-41.51369011	-33.33333333	8.18035678	794160
Bromus briziformis	BRBR5	Graminoid	170	-14.7	-12.365	-36.55102676	8.333333333	44.88436009	2459040
Eriophorum gracile	ERGR8	Graminoid	171	-33.8	-27.15	-60	-41.66666667	18.33333333	4710140
Acer spicatum	ACSP2	Tree, Shrub	171	-21.6	-16.9	-43.60609832	-43.88888889	-0.28279057	1125840
Carex normalis	CANO	Graminoid	171	-15.4	-11.6	-35.36092097	-36.11111111	-0.75019014	1664790
Salix commutata	SACO2	Shrub	172	-32.8	-22.205	-60	-38.88888889	21.11111111	2324880
Populus angustifolia	POAN3	Tree	172	-19.5	-17.09	-43.90168015	-33.33333333	10.56834682	1610790
Juncus confusus	JUCO2	Graminoid	172	-18.9	-16.845	-43.52053516	-38.88888889	4.63164627	1942540
Ampelopsis cordata	AMCO2	Vine	172	-12	-8.8	-31.00497822	-22.22222222	8.782756	2153770
Boltonia asteroides	BOAS	Forb/herb	173	-20.5	-18.4	-45.93963908	-38.88888889	7.05075019	5646150
Solidago flexicaulis	SOFL2	Forb/herb	173	-18.5	-15.72	-41.77037959	-27.77777778	13.99260181	1864800
Helenium flexuosum	HEFL	Forb/herb	173	-11.7	-9.5	-32.09396391	-33.33333333	-1.23936942	2040560
Dalea formosa	DAFO	Subshrub, Shrub	173	-11.7	-8.58	-30.66272558	-25	5.66272558	631130
Pseudotsuga macrocarpa	PSMA	Tree	173	-13.5	-4.18	-23.81767268	-25	-1.18232732	661301
Juglans cinerea	JUCI	Tree	174	-18.1	-15.135	-40.86029869	-36.11111111	4.74918758	3257190
Clarkia pulchella	CLPU	Forb/herb	174	-14.7	-11.7	-35.51649035	8.333333333	43.84982368	1499150
Liatris pycnostachya	LIPY	Forb/herb	174	-16.4	-10.17	-33.13627878	-36.11111111	-2.97483233	1971500
Carex geyeri	CAGE2	Graminoid	176	-21.8	-19.15	-47.10640946	-33.33333333	13.77307613	1332220
Arctophila fulva	ARFU2	Graminoid	177	-39.6	-35.3	-60	-40	20	1331320
Calochortus macrocarpus	CAMA5	Forb/herb	178	-15.8	-12.88	-37.35220909	-30.55555556	6.79665353	494773
Thelypteris noveboracensis	THNO	Forb/herb	178	-16.6	-11.745	-35.58649658	-33.33333333	2.25316325	3218820
Carex rostrata	CARO6	Graminoid	179	-33.9	-29.23	-60	-38.88888889	21.11111111	5892080
Damasonium californicum	DACA12	Forb/herb	179	-11.7	-9.5	-32.09396391	-30.55555556	1.53840835	303886
Eutrochium maculatum	EUMAM		180	-21.9	-19.7	-47.96204107	-33.33333333	14.62870774	4962290
Castilleja coccinea	CACO17	Forb/herb	180	-16.8	-11.8	-35.67205974	-33.33333333	2.33872641	3214310
Trifolium incarnatum	TRIN3	Forb/herb	180	-16.8	-7.925	-29.64374611	-21.66666667	7.97707944	7195950
Castanea dentata	CADE12	Tree	181	-15	-12.7	-37.07218419	-36.11111111	0.96107308	7105370
Panicum clandestinum	DICL	Graminoid	181	-15.6	-10.4	-33.49408836	-36.11111111	-2.61702275	1780620
Leptochloa dubia	LEDU	Graminoid	181	-9.6	-7.2	-28.51586808	-25	3.51586808	4266300
Picea sitchensis	PISI	Tree	182	-16.4	-9.865	-32.66179216	-36.11111111	-3.44931895	2580920
Digitaria californica	DICA8	Graminoid	182	-10	-5.995	-26.641257	-25	1.641257	987003
Heteropogon contortus	HECO10	Graminoid	182	-20.6	-2.895	-21.8186061	-13.88888889	7.92971721	1903940
Calamagrostis stricta	CASTS5	Graminoid	183	-39.6	-33.15	-60	-41.66666667	18.33333333	6085860
Arnica longifolia	ARLO6	Forb/herb	183	-20.8	-18.39	-45.92408214	-36.11111111	9.81297103	1486800
Helianthus grosseserratus	HEGR4	Forb/herb	183	-22.9	-13.98	-39.06347231	-41.66666667	-2.60319436	4028900
Aronia melanocarpa	PHME13	Shrub	183	-18.6	-13.19	-37.83447418	-4.444444444	33.39002974	3794500
Festuca subulata	FESU	Graminoid	183	-15.2	-11.57	-35.31425016	-38.88888889	-3.57463873	1746040
Mikania scandens	MISC	Vine, Forb/herb	183	-11.3	-10.04	-32.93403858	-38.88888889	-5.95485031	2226440
Rubus laciniatus	RULA	Vine, Subshrub	183	-10	-6.46	-27.36465464	-36.11111111	-8.74645647	4245870
Crepis runcinata	CRRU3	Forb/herb	184	-22.1	-19.94	-48.33540759	-38.88888889	9.4465187	2810660
Picea engelmannii	PIEN	Tree	184	-20.2	-16.985	-43.7383323	-45.55555556	-1.81722326	4145130
Penstemon angustifolius	PEAN4	Subshrub, Forb/herb	184	-19.2	-16.285	-42.64934661	-33.33333333	9.31601328	1313510
Carex comosa	CACO8	Graminoid	184	-22.1	-13.37	-38.11449907	-33.33333333	4.78116574	6256170
Clintonia borealis	CLBO3	Forb/herb	185	-23.1	-18.06	-45.41070317	-36.11111111	9.29959206	1235980
Muhlenbergia mexicana	MUME2	Graminoid	185	-19	-14.1	-39.25015557	-36.11111111	3.13904446	6070060
Pennisetum glaucum	PEGL2	Graminoid	185	-18.3	-11.46	-35.14312383	-37.22222222	-2.07909839	7101400
Ruellia strepens	RUST2	Forb/herb	185	-11.1	-9.4	-31.93839452	-25	6.93839452	1250230
Digitalis purpurea	DIPU	Forb/herb	185	-12.2	-7.2	-28.51586808	-25	3.51586808	4744450
Larix laricina	LALA	Tree	186	-30.2	-27.75	-60	-61.66666667	-1.66666667	2780720
Bolboschoenus fluviatilis	SCFL11	Graminoid	186	-21.5	-19.05	-46.95084007	-38.88888889	8.06195118	5631010
Physocarpus opulifolius	PHOP	Shrub	186	-19.5	-14.875	-40.45581829	-36.11111111	4.34470718	3575350
Carex debilis	CADE5	Graminoid	187	-18.1	-16	-42.20597386	-25	17.20597386	1479050
Betula lenta	BELE	Tree	187	-15.1	-13.8	-38.78344742	-32.22222222	6.5612252	986504
Juniperus monosperma	JUMO	Tree, Shrub	187	-16.9	-12.58	-36.88550093	-25	11.88550093	859434
Carex bushii	CABU5	Graminoid	187	-11.8	-9.3	-31.78282514	-30.55555556	1.22726958	1588240
Carex raynoldsii	CARA6	Graminoid	188	-20.8	-16	-42.20597386	-36.11111111	6.09486275	1562740
Carex simulata	CASI2	Graminoid	188	-20.6	-15.72	-41.77037959	-38.88888889	2.8814907	2212130
Sorbus sitchensis	SOSIG	Tree, Shrub	188	-21.8	-14.3	-39.56129434	-33.33333333	6.22796101	3183780
Robinia neomexicana	RONE	Tree, Shrub	188	-16	-12.6	-36.91661481	-30.55555556	6.36105925	867707
Olsynium douglasii	OLDOD	Forb/herb	188	-16.3	-10.365	-33.43963908	-30.55555556	2.88408352	535734
Alisma plantago-aquatica	ALPL	Forb/herb	188	-13.9	-10.115	-33.05071562	-36.11111111	-3.06039549	4566680
Ilex opaca	ILOP	Tree, Shrub	188	-9.3	-8.3	-30.2271313	-28.88888889	1.33824241	5560920
Poa leptocoma	POLE2	Graminoid	189	-36.9	-27.02	-60	-33.33333333	26.66666667	3330380
Echinacea purpurea	ECPU	Forb/herb	189	-21	-11.94	-35.88985688	-36.11111111	-0.22125423	3299710
Equisetum sylvaticum	EQSY	Forb/herb	190	-34.1	-30.81	-60	-41.66666667	18.33333333	2974510
Muhlenbergia racemosa	MURA	Graminoid	191	-21.6	-18.2	-45.62850031	-38.88888889	6.73961142	4017510
Alisma subcordatum	ALSU	Forb/herb	191	-23	-11.65	-35.43870566	-36.11111111	-0.67240545	4885680
Trifolium macrocephalum	TRMA3	Forb/herb	191	-14.9	-11.2	-34.73864343	11.11111111	45.84975454	736807
Abies grandis	ABGR	Tree	191	-18.9	-9.2	-31.62725576	-36.11111111	-4.48385535	1631050
Calliandra eriophylla	CAER	Subshrub, Shrub	191	-4.3	-2.05	-20.5040448	-2.222222222	18.28182258	459327
Carex interior	CAIN11	Graminoid	192	-35.9	-20.6	-49.36216553	-38.88888889	10.47327664	5708420
Juncus longistylis	JULO	Graminoid	193	-21.9	-18.94	-46.77971375	-38.88888889	7.89082486	3156420
Chenopodium rubrum	CHRU	Forb/herb	194	-33.8	-19.87	-48.22650902	11.11111111	59.33762013	6406300
Balsamorhiza hookeri	BAHO	Forb/herb	194	-15.5	-13.62	-38.50342253	-27.77777778	10.72564475	850453
Rumex arcticus	RUAR6	Forb/herb	195	-38.2	-34.16	-60	-52.22222222	7.77777778	1420810
Carex stricta	CAST8	Graminoid	195	-18.7	-14.29	-39.5457374	-38.88888889	0.65684851	2697520
Mertensia virginica	MEVI3	Forb/herb	196	-16.9	-11.975	-35.94430616	-33.33333333	2.61097283	1471390
Ribes americanum	RIAM2	Shrub	197	-22.5	-20.1	-48.58431861	-43.33333333	5.25098528	3215220
Carex mertensii	CAME6	Graminoid	197	-21.9	-17.62	-44.72619788	-33.33333333	11.39286455	751824
Ephedra torreyana	EPTO	Subshrub, Shrub	197	-15.1	-11.52	-35.23646546	-33.33333333	1.90313213	1226610
Blechnum spicant	BLSP	Forb/herb	197	-15.3	-7.64	-29.20037337	-22.22222222	6.97815115	3038760
Peltandra virginica	PEVI	Forb/herb	198	-14.7	-10.83	-34.16303671	-30.55555556	3.60748115	4834690
Eucalyptus globulus	EUGL	Tree	198	-7.1	1.385	-15.16023647	-8.333333333	6.826903137	2735410
Cornus alternifolia	COAL2	Tree, Shrub	199	-17.9	-15.2	-40.96141879	-43.88888889	-2.9274701	5542540
Muhlenbergia frondosa	MUFR2	Graminoid	199	-19	-11.11	-34.59863099	-38.88888889	-4.2902579	2592040
Eurybia integrifolia	EUIN9	Forb/herb, Subshrub	199	-17.3	-10.5	-33.64965775	-30.55555556	3.09410219	583812
Smilax rotundifolia	SMRO	Shrub, Vine	199	-10.3	-9.1	-31.47168637	-36.11111111	-4.63942474	1989710
Sphaeralcea grossulariifolia	SPGR2	Subshrub, Forb/herb	200	-15	-12.925	-37.42221531	-30.55555556	6.86665975	1154080
Vaccinium angustifolium	VAAN	Subshrub, Shrub	201	-22.8	-17	-43.7616677	-36.11111111	7.65055659	1073020
Allium tolmiei	ALTO	Forb/herb	201	-16.2	-12.1	-36.13876789	-36.11111111	0.02765678	358179
Tsuga heterophylla	TSHE	Tree	201	-16.4	-9	-31.31611699	-30.55555556	0.76056143	694833
Carex deweyana	CADE9	Graminoid	202	-30	-17.38	-44.35283136	-36.11111111	8.24172025	4672220
Mimulus suksdorfii	MISU2	Forb/herb	202	-12.3	-10.8	-34.1163659	11.11111111	45.22747701	1195160
Nitrophila occidentalis	NIOC2	Forb/herb	202	-12.8	-9.3	-31.78282514	-25	6.78282514	2528460
Ruppia maritima	RUMA5	Forb/herb	202	-14.1	-9.09	-31.45612943	-18.88888889	12.56724054	7952440
Epilobium coloratum	EPCO	Forb/herb	204	-19.7	-12.085	-36.11543248	-36.11111111	0.00432137	2361550
Amaranthus californicus	AMCA	Forb/herb	204	-13.2	-9.655	-32.33509645	-19.44444444	12.89065201	2398440
Erigeron petrophilus	ERPE5	Forb/herb	204	-8.3	-6.7	-27.73802116	-13.88888889	13.84913227	128377
Rosa acicularis	ROAC	Subshrub	205	-36.9	-33.98	-60	-38.88888889	21.11111111	5770390
Cardamine bulbosa	CABU3	Forb/herb	206	-18.3	-11.3	-34.89421282	-36.11111111	-1.21689829	2326090
Eriogonum elatum	EREL5	Subshrub, Forb/herb	206	-13.3	-10.675	-33.92190417	-33.33333333	0.58857084	1262880
Rhododendron periclymenoides	RHPE4	Shrub	206	-14.3	-10.55	-33.72744244	-27.77777778	5.94966466	756420
Peritoma lutea	CLLU2	Forb/herb	207	-16.3	-13.77	-38.7367766	8.333333333	47.07010993	1242240
Pinus rigida	PIRI	Tree	207	-17	-13.5	-38.31673927	-41.66666667	-3.3499274	3513690
Salix fuscescens	SAFU	Subshrub, Shrub	208	-39.5	-33.42	-60	4.444444444	64.44444444	1214190
Viburnum edule	VIED	Shrub	208	-35.6	-32.1	-60	-52.22222222	7.77777778	4280930
Potentilla arguta	POAR7	Subshrub, Forb/herb	208	-21.5	-17.03	-43.80833852	-38.88888889	4.91944963	4702320
Sparganium eurycarpum	SPEU	Forb/herb	208	-18.2	-12.695	-37.06440572	-36.11111111	0.95329461	5416540
Fraxinus anomala	FRAN2	Tree, Shrub	208	-20.6	-11.26	-34.83198507	-30.55555556	4.27642951	629032
Maurandella antirrhiniflora	MAAN9	Vine, Forb/herb	208	-10.3	-8.395	-30.37492222	-22.22222222	8.1527	1449480
Salix richardsonii	SARI4	Shrub, Tree	209	-39.6	-36.66	-60	-38.88888889	21.11111111	1290040
Agrimonia gryposepala	AGGR2	Forb/herb	209	-16.1	-13.9	-38.9390168	-41.66666667	-2.72764987	5121760
Celtis laevigata	CELA	Tree, Shrub	209	-16.6	-10.1	-33.02738021	-29.44444444	3.58293577	5451010
Carya glabra	CAGL8	Tree	210	-15.1	-10.555	-33.73522091	-34.44444444	-0.70922353	3674530
Myosotis scorpioides	MYSC	Forb/herb	211	-26.9	-13.9	-38.9390168	-36.11111111	2.82790569	5670220
Juncus articulatus	JUAR4	Graminoid	211	-16.7	-13.6	-38.47230865	-33.33333333	5.13897532	5231130
Bidens laevis	BILA	Forb/herb	211	-13.9	-8.15	-29.99377722	11.11111111	41.10488833	5343290
Ribes hudsonianum	RIHU	Shrub	212	-33.9	-31.745	-60	-36.11111111	23.88888889	1929680
Penstemon cyananthus	PECY2	Forb/herb	213	-18.9	-15.7	-41.73926571	-30.55555556	11.18371015	164328
Malus fusca	MAFU	Tree, Shrub	213	-14.8	-8.48	-30.50715619	-2.777777778	27.72937841	462756
Stellaria longifolia	STLO	Forb/herb	214	-33.3	-29.805	-60	-38.88888889	21.11111111	6187450
Crataegus crus-galli	CRCR2	Tree, Shrub	214	-13.5	-10.8	-34.1163659	-36.11111111	-1.99474521	3567740
Carex capillaris	CACA12	Graminoid	215	-39.6	-35.93	-60	-41.66666667	18.33333333	5979010
Carex limosa	CALI7	Graminoid	215	-34	-31.46	-60	-36.11111111	23.88888889	4958010
Parnassia fimbriata	PAFI3	Forb/herb	215	-25	-19.06	-46.96639701	-33.33333333	13.63306368	1699820
Viburnum lantanoides	VILA11	Shrub	215	-17.2	-16.09	-42.34598631	-38.88888889	3.45709742	966332
Neottia convallarioides	LICO5	Forb/herb	215	-19.4	-13.18	-37.81891724	-38.88888889	-1.06997165	4551570
Amelanchier canadensis	AMCA4	Tree, Shrub	215	-13.8	-11.26	-34.83198507	-36.11111111	-1.27912604	3767980
Stuckenia filiformis	STFIF	Forb/herb	216	-38.5	-33.925	-60	-38.88888889	21.11111111	7677160
Spiraea betulifolia	SPBE2	Shrub	216	-18.8	-17.2	-44.07280647	-38.88888889	5.18391758	3392690
Packera aurea	PAAU3	Forb/herb	216	-18.4	-11.05	-34.50528936	-41.66666667	-7.16137731	3292920
Conoclinium coelestinum	COCO13	Forb/herb	216	-11.3	-7.9	-29.60485376	-25	4.60485376	2486650
Penstemon strictus	PEST2	Forb/herb	217	-21.6	-18	-45.31736154	-36.11111111	9.20625043	845848
Fritillaria pudica	FRPU2	Forb/herb	217	-19.2	-14.14	-39.31238332	8.333333333	47.64571665	1010650
Sorghum bicolor	SOBI2	Graminoid	217	-16.3	-9.76	-32.49844431	8.333333333	40.83177764	7500810
Astragalus agrestis	ASAG2	Forb/herb	218	-22.7	-20.5	-49.20659614	-36.11111111	13.09548503	2370640
Bidens connata	BICO5	Forb/herb	218	-20	-13.2	-37.85003111	8.333333333	46.18336444	2707060
Bolboschoenus maritimus	SCMA8	Graminoid	218	-16.2	-11.2	-34.73864343	-30.55555556	4.18308787	5094400
Tetradymia glabrata	TEGL	Subshrub, Shrub	218	-12.4	-9.715	-32.42843808	-25	7.42843808	606819
Carex lyngbyei	CALY3	Graminoid	219	-24.4	-20.23	-48.78655881	-46.66666667	2.11989214	1112800
Clethra alnifolia	CLAL3	Shrub	219	-16.9	-10.42	-33.52520224	-30.55555556	2.96964668	1706620
Viburnum prunifolium	VIPR	Tree, Shrub	219	-11.8	-10.21	-33.19850653	-36.11111111	-2.91260458	3342710
Pinus coulteri	PICO3	Tree	219	-6.1	-4.3	-24.00435594	-11.11111111	12.89324483	487740
Calamagrostis inexpansa	CASTI3	Graminoid	220	-35.9	-29.23	-60	-38.88888889	21.11111111	6584450
Puccinellia nuttalliana	PUNU2	Graminoid	220	-39.6	-27.62	-60	-38.88888889	21.11111111	3512030
Abies lasiocarpa	ABLA	Tree	220	-19.8	-16.905	-43.61387679	-46.11111111	-2.49723432	2540370
Yucca baccata	YUBA	Subshrub, Shrub, Forb/herb	221	-13.9	-10.3	-33.33851898	-19.44444444	13.89407454	943724
Salix rotundifolia	SARO2	Subshrub, Shrub	222	-39	-35.8	-60	-34.44444444	25.55555556	2319660
Leymus mollis	LEMOM2	Graminoid	222	-39.6	-28.995	-60	-13.88888889	46.11111111	4981320
Cardamine cordifolia	CACO6	Forb/herb	222	-21	-17.9	-45.16179216	-33.33333333	11.82845883	1513520
Yucca glauca	YUGL	Subshrub, Shrub, Forb/herb	223	-18.7	-16.6	-43.13939017	-33.33333333	9.80605684	2441950
Clematis virginiana	CLVI5	Vine	223	-21	-15.59	-41.56813939	-38.88888889	2.6792505	2994970
Caulophyllum thalictroides	CATH2	Forb/herb	223	-22.8	-14.29	-39.5457374	-36.11111111	3.43462629	2955650
Symphyotrichum puniceum	SYPUP	Forb/herb, Subshrub	224	-23.7	-17.795	-44.99844431	-37.22222222	7.77622209	2078140
Muhlenbergia schreberi	MUSC	Graminoid	224	-15	-10.57	-33.75855632	-36.11111111	-2.35255479	3576770
Lupinus arcticus	LUAR2	Forb/herb	225	-39.6	-34.96	-60	-52.22222222	7.77777778	1402430
Heterotheca villosa var villosa	HEVIV	Subshrub, Forb/herb	225	-22.5	-19.98	-48.39763535	-38.88888889	9.50874646	4285810
Justicia americana	JUAM	Forb/herb	225	-11.4	-8.98	-31.28500311	-33.33333333	-2.04833022	2039250
Liquidambar styraciflua	LIST2	Tree	225	-10.8	-8.08	-29.88487866	-29.44444444	0.44043422	4650300
Argemone polyanthemos	ARPO2	Forb/herb	226	-18.5	-13	-37.53889235	-30.55555556	6.98333679	4342090
Lycopus virginicus	LYVI4	Forb/herb	226	-17.9	-12.525	-36.79993777	-36.11111111	0.68882666	2314510
Mimulus nanus	MINA	Forb/herb	226	-14.9	-12.075	-36.09987554	0	36.09987554	405816
Carex tribuloides	CATR7	Graminoid	227	-31.7	-13.47	-38.27006845	-33.33333333	4.93673512	4999280
Purshia stansburiana	PUST	Tree, Shrub	227	-12.2	-11	-34.42750467	-30.55555556	3.87194911	685323
Atriplex gardneri	ATGA	Subshrub, Shrub	228	-20.5	-18.13	-45.51960174	-38.88888889	6.63071285	1743020
Orthocarpus luteus	ORLU2	Forb/herb	228	-21.5	-17.795	-44.99844431	11.11111111	56.10955542	2314980
Alopecurus carolinianus	ALCA4	Graminoid	228	-15.2	-10.9	-34.27193528	-41.66666667	-7.39473139	6396570
Hibiscus moscheutos	HIMO	Subshrub, Forb/herb	229	-11.6	-8.2	-30.07156192	-25	5.07156192	5403710
Blepharoneuron tricholepis	BLTR	Graminoid	230	-21.3	-18.565	-46.19632856	-30.55555556	15.640773	677133
Osmunda claytoniana	OSCL2	Forb/herb	230	-19.7	-16.075	-42.3226509	-38.88888889	3.43376201	1658960
Sidalcea neomexicana	SINE3	Subshrub, Forb/herb	231	-21.5	-17	-43.7616677	-30.55555556	13.20611214	1733340
Carex granularis	CAGR3	Graminoid	231	-19	-12.45	-36.68326073	-36.11111111	0.57214962	2752900
Astragalus curvicarpus	ASCU4	Forb/herb	231	-15.6	-11.4	-35.0497822	-30.55555556	4.49422664	474158
Castilleja sessiliflora	CASE5	Subshrub, Forb/herb	232	-22.7	-18.745	-46.47635345	-38.88888889	7.58746456	2683350
Apios americana	APAM	Vine, Forb/herb	232	-18	-13.645	-38.54231487	-30.55555556	7.98675931	3358890
Amelanchier arborea	AMAR3	Tree, Shrub	232	-15.5	-11.245	-34.80864966	-43.88888889	-9.08023923	1977820
Quercus palustris	QUPA2	Tree	232	-15.2	-10.1	-33.02738021	-36.11111111	-3.0837309	4693560
Rubus chamaemorus	RUCH	Subshrub, Forb/herb	233	-39.6	-35.3	-60	-38.88888889	21.11111111	2184830
Pinus muricata	PIMU	Tree	233	-8	2.7	-13.11449907	-8.333333333	4.781165737	1343380
Salix monticola	SAMO2	Tree, Shrub	234	-32.7	-20.27	-48.84878656	-38.88888889	9.95989767	1986790
Penstemon fruticosus	PEFR3	Subshrub	234	-19.2	-17.7	-44.85065339	-25	19.85065339	950654
Populus balsamifera	POBA2	Tree	235	-36.9	-34.02	-60	-61.66666667	-1.66666667	6442070
Rumex maritimus	RUMA4	Forb/herb	235	-33	-16.09	-42.34598631	-38.88888889	3.45709742	5080590
Alopecurus geniculatus	ALGE2	Graminoid	235	-35.4	-14.56	-39.96577474	-41.66666667	-1.70089193	7463550
Carex frankii	CAFR3	Graminoid	235	-11.3	-9.1	-31.47168637	-30.55555556	0.91613081	2306260
Stipa viridula	NAVI4	Graminoid	236	-21.5	-19.2	-47.18419415	-38.88888889	8.29530526	2332120
Persicaria sagittata	POSA5	Vine, Forb/herb	236	-20.4	-13.675	-38.58898569	-25	13.58898569	4561590
Yucca brevifolia	YUBRB	Tree, Shrub	236	-11.6	-5.05	-25.17112632	-2.777777778	22.39334854	417601
Luzula spicata	LUSP4	Graminoid	237	-36.6	-23.82	-60	-36.11111111	23.88888889	4564600
Salix planifolia	SAPL2	Tree, Subshrub, Shrub	237	-34.5	-18	-45.31736154	-38.88888889	6.42847265	4352080
Festuca viridula	FEVI	Graminoid	237	-18	-14.9	-40.49471064	-36.11111111	4.38359953	1550560
Cornus racemosa	CORA6	Shrub	237	-20.4	-13.32	-38.03671437	-43.88888889	-5.85217452	1965650
Menodora scabra	MESC	Subshrub, Forb/herb	237	-11.4	-9.04	-31.37834474	-7.777777778	23.60056696	774218
Galium tinctorium	GATI	Forb/herb	238	-18.2	-12.9	-37.38332296	-36.11111111	1.27221185	5224650
Amelanchier alnifolia	AMAL2	Tree, Shrub	238	-19	-7.725	-29.33260734	-52.22222222	-22.88961488	1313580
Arundo donax	ARDO4	Subshrub, Shrub, Graminoid	238	-13.5	-3.395	-22.59645302	-13.88888889	8.70756413	4237630
Spiraea alba	SPAL2	Shrub	239	-22.5	-19.91	-48.28873678	-36.11111111	12.17762567	2059420
Shepherdia argentea	SHAR	Tree, Shrub	239	-20.9	-18.51	-46.1107654	-38.88888889	7.22187651	3767540
Panicum obtusum	PAOB	Graminoid	239	-13.4	-10.6	-33.80522713	-30.55555556	3.24967157	1115340
Lycium pallidum	LYPA	Shrub	239	-13.7	-10.31	-33.35407592	-25	8.35407592	1403350
Holodiscus dumosus	HODU	Shrub	240	-21.5	-18.015	-45.34069695	-30.55555556	14.78514139	1558580
Carex cephalophora	CACE	Graminoid	240	-15	-11.005	-34.43528314	-36.11111111	-1.67582797	1699890
Aesculus glabra	AEGL	Tree	240	-15	-10.315	-33.36185439	-36.11111111	-2.74925672	3928770
Taxodium distichum	TADI2	Tree	240	-14.7	-7.11	-28.37585563	-27.77777778	0.59807785	5968610
Ceanothus papillosus	CEPA2	Shrub	240	-1.1	0.7	-16.22588675	-4.444444444	11.78144231	221596
Betula nana	BENA	Shrub, Subshrub	241	-39.6	-35.9	-60	-41.66666667	18.33333333	4188260
Thuja plicata	THPL	Tree	241	-13.6	-9.2	-31.62725576	-36.11111111	-4.48385535	4374080
Lilaea scilloides	LISC4	Graminoid	242	-9.3	-8.39	-30.36714375	11.11111111	41.47825486	695483
Pontederia cordata	POCO14	Forb/herb	243	-19	-15	-40.65028002	-30.55555556	10.09472446	6019360
Sagittaria cuneata	SACU	Forb/herb	244	-33.3	-21.985	-60	-36.11111111	23.88888889	5155020
Potamogeton amplifolius	POAM5	Forb/herb	244	-23.5	-14.94	-40.55693839	-36.11111111	4.44582728	5140140
Ratibida pinnata	RAPI	Forb/herb	244	-17.5	-11.285	-34.87087741	-38.88888889	-4.01801148	1972380
Achnatherum occidentale occidentale	ACOCO	Graminoid	244	-17.8	-10.5	-33.64965775	-33.33333333	0.31632442	1080390
Penstemon whippleanus	PEWH	Subshrub, Forb/herb	245	-21	-18.48	-46.06409459	-36.66666667	9.39742792	661562
Picrothamnus desertorum	PIDE4	Subshrub, Shrub	245	-17.9	-15.38	-41.24144368	-41.66666667	-0.42522299	1045420
Vitis riparia	VIRI	Vine	245	-18.1	-12.58	-36.88550093	-36.11111111	0.77438982	5497840
Rhododendron groenlandicum	LEGR	Shrub	246	-38.2	-32.775	-60	-36.11111111	23.88888889	2380570
Myrica gale	MYGA	Shrub	246	-33.8	-28.55	-60	-36.11111111	23.88888889	3022690
Pycreus bipartitus	CYBI6	Graminoid	246	-19.5	-12.8	-37.22775358	0	37.22775358	3741570
Symphyotrichum subspicatum	SYSUS	Forb/herb	246	-21.7	-12.5	-36.76104543	-22.22222222	14.53882321	1560190
Solidago caesia	SOCA4	Forb/herb	248	-16.1	-12.995	-37.53111388	-33.33333333	4.19778055	1850330
Cyperus acuminatus	CYAC2	Graminoid	248	-18.3	-11.73	-35.56316117	-38.88888889	-3.32572772	4414040
Cupressus arizonica	CUAR		249	-8.2	-5.7	-26.18232732	-30.55555556	-4.37322824	2256070
Nuphar polysepala	NULUP	Forb/herb	250	-33.9	-28.1	-60	-52.22222222	7.77777778	5262410
Ranunculus macounii	RAMA2	Forb/herb	250	-33.5	-22.6	-60	-52.22222222	7.77777778	4049890
Anemone multifida	ANMU	Forb/herb	250	-37.9	-20.8	-49.67330429	-30.55555556	19.11774873	4310990
Ribes aureum var villosum	RIAUV	Shrub	250	-19.2	-16.7	-43.29495955	-43.33333333	-0.03837378	3863750
Artemisia nova	ARNO4	Subshrub, Shrub	250	-19.8	-15.065	-40.75140012	-30.55555556	10.19584456	1310460
Salix irrorata	SAIR	Shrub	250	-19.6	-13.165	-37.79558183	-45.55555556	-7.75997373	297850
Vaccinium ovalifolium	VAOV	Shrub	251	-29.5	-18.8	-46.56191661	-36.11111111	10.4508055	2358450
Xerophyllum tenax	XETE	Forb/herb	251	-15	-11.05	-34.50528936	-13.88888889	20.61640047	749504
Antennaria luzuloides	ANLU2	Subshrub, Forb/herb	252	-18.9	-14.46	-39.81020535	-36.11111111	3.69909424	1294910
Erigeron filifolius	ERFI2	Forb/herb	252	-15	-13.045	-37.60889857	-24.44444444	13.16445413	772648
Sparganium americanum	SPAM	Forb/herb	252	-15.7	-12.4	-36.60547604	-36.11111111	0.49436493	2000520
Gaillardia aristata	GAAR	Forb/herb	253	-20.2	-15.3	-41.11698818	-36.11111111	5.00587707	5762210
Fragaria chiloensis	FRCH	Forb/herb	253	-18.5	-9.04	-31.37834474	-36.11111111	-4.73276637	517405
Sporobolus compositus var comp	SPCOC2	Graminoid	254	-19.4	-15.335	-41.17143746	-38.88888889	2.28254857	2140400
Elaeagnus umbellata	ELUM	Shrub	254	-15.6	-12.735	-37.12663348	-30.55555556	6.57107792	5475690
Symplocarpus foetidus	SYFO	Forb/herb	254	-19.4	-12.24	-36.35656503	-36.11111111	0.24545392	969753
Desmodium paniculatum	DEPA6	Forb/herb	254	-12.4	-10.4	-33.49408836	-25	8.49408836	2665120
Hypericum gentianoides	HYGE	Forb/herb	254	-15.1	-10.3	-33.33851898	8.333333333	41.67185231	2096570
Celastrus orbiculatus	CEOR7	Vine	255	-15.8	-13.7	-38.62787803	-38.88888889	-0.26101086	1518560
Gaylussacia baccata	GABA	Shrub	256	-14.6	-12.4	-36.60547604	-36.11111111	0.49436493	1171890
Agrostis capillaris	AGCA5	Graminoid	256	-16.8	-12.35	-36.52769135	-47.22222222	-10.69453087	5731660
Quercus marilandica	QUMA3	Tree, Shrub	256	-10.7	-8.925	-31.19943995	-25	6.19943995	3559830
Carex disperma	CADI6	Graminoid	257	-33.5	-27.84	-60	-38.88888889	21.11111111	5375680
Eragrostis curvula	ERCU2	Graminoid	257	-11.5	-8.4	-30.38270068	-22.22222222	8.16047846	6163560
Vaccinium vitis-idaea	VAVI	Shrub, Subshrub	258	-39.6	-35.745	-60	-52.22222222	7.77777778	2076130
Kalmia microphylla	KAMI	Subshrub, Shrub	258	-20.4	-15.815	-41.9181705	-33.33333333	8.58483717	1718390
Aconogonon davisiae	PODA	Subshrub, Forb/herb	258	-18.4	-9.115	-31.49502178	-30.55555556	0.93946622	549545
Gaultheria procumbens	GAPR2	Subshrub, Shrub	259	-17.8	-15.1	-40.80584941	-36.11111111	4.6947383	2554910
Downingia bicornuta	DOBI	Forb/herb	259	-11.5	-8.92	-31.19166148	8.333333333	39.52499481	260959
Ephedra trifurca	EPTR	Shrub	260	-6.7	-4.5	-24.31549471	-25	-0.68450529	507769
Cassiope tetragona	CATE11	Subshrub, Shrub	261	-39.6	-35.9	-60	-41.66666667	18.33333333	1372690
Lyonia ligustrina	LYLI	Shrub	261	-14.7	-12.6	-36.91661481	-29.44444444	7.47217037	1594300
Rorippa sinuata	ROSI2	Forb/herb	261	-18.3	-11.7	-35.51649035	-38.88888889	-3.37239854	3199380
Cinna arundinacea	CIAR2	Graminoid	261	-15.4	-11.3	-34.89421282	-36.11111111	-1.21689829	2146360
Chamaecyparis lawsoniana	CHLA	Tree	261	-11.3	-6.7	-27.73802116	-24.44444444	3.29357672	4924070
Salix boothii	SABO2	Shrub	262	-32.4	-26.495	-60	-10.55555556	49.44444444	2177210
Dactylis glomerata	DAGL	Graminoid	262	-19.2	-14.585	-40.00466708	-36.11111111	3.89355597	7200530
Asimina triloba	ASTR	Tree, Shrub	262	-11.8	-9.6	-32.24953329	-32.77777778	-0.52824449	2161200
Artemisia tilesii	ARTI	Subshrub, Forb/herb	263	-39.6	-35.96	-60	-52.22222222	7.77777778	1637830
Lathyrus japonicus	LAJA	Vine, Forb/herb	263	-26.4	-16.3	-42.67268202	-36.11111111	6.56157091	3557920
Abies magnifica	ABMA	Tree	263	-11.1	-9.19	-31.61169882	-30.55555556	1.05614326	1574750
Rubus allegheniensis	RUAL	Subshrub	264	-20.8	-17.44	-44.44617299	-33.33333333	11.11283966	5448730
Avena sativa	AVSA	Graminoid	265	-28.9	-10.78	-34.08525202	-30.55555556	3.52969646	6963710
Jamesia americana	JAAM	Shrub	266	-19.2	-15.375	-41.23366521	-30.55555556	10.67810965	988929
Rhododendron viscosum	RHVI2	Shrub	266	-15.3	-10.775	-34.07747355	-27.77777778	6.29969577	1598790
Lupinus caudatus	LUCA	Forb/herb	267	-21.8	-17	-43.7616677	-33.33333333	10.42833437	1698550
Geranium viscosissimum	GEVI2	Forb/herb	267	-21	-16.92	-43.6372122	-25	18.6372122	1745650
Betula alleghaniensis	BEAL2	Tree	267	-18.5	-15.9	-42.05040448	-43.88888889	-1.83848441	1329900
Toxicoscordion paniculatum	ZIPA2	Forb/herb	267	-18.2	-11.87	-35.78095831	-36.11111111	-0.3301528	1388450
Carex leptalea	CALE10	Graminoid	268	-35.2	-27.68	-60	-36.11111111	23.88888889	7053400
Corylus americana	COAM3	Shrub	268	-22.2	-13.265	-37.95115121	-36.11111111	1.8400401	5235990
Campanula americana	CAAM18	Forb/herb	268	-16.9	-11.93	-35.87429994	11.11111111	46.98541105	1725510
Symphyotrichum patens	SYPAP2	Forb/herb	268	-11.7	-10.3	-33.33851898	-38.88888889	-5.55036991	1856130
Salix bonplandiana	SABO	Tree	268	-11	-5.3	-25.56004978	-1.111111111	24.44893867	702746
Berberis thunbergii	BETH	Shrub	269	-15.8	-14.9	-40.49471064	-33.33333333	7.16137731	3959280
Poa trivialis	POTR2	Graminoid	269	-16.9	-10.88	-34.24082141	-33.33333333	0.90748808	6537440
Secale cereale	SECE	Graminoid	269	-20.1	-10.6	-33.80522713	-36.11111111	-2.30588398	7406020
Panicum commutatum	DICO2	Graminoid	271	-16.3	-8.6	-30.69383945	-33.33333333	-2.63949388	5088920
Chamaedaphne calyculata	CHCA2	Shrub	272	-39.6	-31.945	-60	-33.33333333	26.66666667	3601190
Perideridia gairdneri	PEGA3	Forb/herb	272	-18.6	-14.845	-40.40914748	-27.77777778	12.6313697	2017750
Salix humilis	SAHU2	Shrub	272	-23.1	-11.69	-35.50093342	-41.66666667	-6.16573325	2819610
Allium validum	ALVA	Forb/herb	273	-14.9	-14.7	-40.18357187	-27.77777778	12.40579409	501124
Hordeum vulgare	HOVU	Graminoid	273	-26.9	-9.5	-32.09396391	-41.66666667	-9.57270276	6950400
Cicuta douglasii	CIDO	Forb/herb	274	-32.3	-12.645	-36.98662103	-33.33333333	3.6532877	2765160
Prunus subcordata	PRSU2	Tree, Shrub	274	-9.4	-8.5	-30.53827007	-33.33333333	-2.79506326	270040
Baccharis sarothroides	BASA2	Shrub	274	-8.5	-3.17	-22.2464219	-2.222222222	20.02419968	650174
Carex intumescens	CAIN12	Graminoid	275	-19.4	-15.46	-41.36589919	-36.11111111	5.25478808	4864380
Carex obnupta	CAOB3	Graminoid	276	-8.1	-1.325	-19.37616677	-19.44444444	-0.06827767	329281
Alopecurus pratensis	ALPR3	Graminoid	277	-35.6	-19.08	-46.99751089	-38.88888889	8.108622	6921570
Symphyotrichum cordifolium	SYCO4	Forb/herb	277	-19.3	-13.34	-38.06782825	-38.88888889	-0.82106064	2509230
Wyethia mollis	WYMO	Forb/herb	277	-11.2	-10	-32.87181083	-25	7.87181083	207406
Rhododendron macrophyllum	RHMA3	Tree, Shrub	277	-9	-5.02	-25.12445551	-13.88888889	11.23556662	231556
Machaeranthera tanacetifolia	MATA2	Forb/herb	279	-17.7	-11.8	-35.67205974	-36.11111111	-0.43905137	1575740
Arrhenatherum elatius	AREL3	Graminoid	279	-20.4	-11	-34.42750467	-38.88888889	-4.46138422	7179540
Morus rubra	MORU2	Tree	279	-11.8	-10.01	-32.88736777	-36.11111111	-3.22374334	5835950
Pinus edulis	PIED	Tree	280	-19.5	-16.3	-42.67268202	-35	7.67268202	2276690
Lithospermum ruderale	LIRU4	Forb/herb	280	-18.5	-15.71	-41.75482265	-33.33333333	8.42148932	1381030
Hedysarum alpinum	HEAL	Forb/herb	281	-39.6	-35.6	-60	-52.22222222	7.77777778	2757930
Triteleia grandiflora	TRGR7	Forb/herb	281	-18.6	-14.2	-39.40572495	-36.11111111	3.29461384	845423
Tragopogon porrifolius	TRPO	Forb/herb	281	-22.7	-10.2	-33.1829496	-33.33333333	-0.15038373	5377920
Potamogeton diversifolius	PODI	Forb/herb	281	-12.3	-10	-32.87181083	-38.88888889	-6.01707806	5219050
Phyla nodiflora	PHNO2	Forb/herb	281	-10.9	-5.4	-25.71561917	-27.77777778	-2.06215861	4819530
Vaccinium scoparium	VASC	Subshrub, Shrub	282	-19.8	-16.9	-43.60609832	-25	18.60609832	2053140
Salix lutea	SALU2	Tree, Shrub	282	-18.4	-14	-39.09458619	-41.66666667	-2.57208048	3024440
Scirpus pendulus	SCPE4	Graminoid	282	-15.6	-11	-34.42750467	-38.88888889	-4.46138422	4365410
Allium textile	ALTE	Forb/herb	283	-21.5	-18.4	-45.93963908	-38.88888889	7.05075019	1976500
Callirhoe involucrata	CAIN2	Forb/herb	283	-14.6	-10.99	-34.41194773	-38.88888889	-4.47694116	2717600
Eragrostis intermedia	ERIN	Graminoid	283	-10.1	-8.16	-30.00933416	-30.55555556	-0.5462214	2240530
Cardamine breweri	CABRB	Forb/herb	284	-18.5	-14.58	-39.99688861	-27.77777778	12.21911083	1772820
Diospyros virginiana	DIVI5	Tree	284	-13.6	-8.6	-30.69383945	-29.44444444	1.24939501	4822340
Carya cordiformis	CACO15	Tree	285	-15	-12.26	-36.3876789	-43.88888889	-7.50120999	2282750
Equisetum fluviatile	EQFL	Forb/herb	286	-39.6	-33.2	-60	-36.11111111	23.88888889	3797480
Alnus viridis subsp sinuata	ALVIS	Tree, Shrub	286	-36.8	-15.375	-41.23366521	-44.44444444	-3.21077923	1304110
Vaccinium stamineum	VAST	Shrub	286	-12.3	-10.575	-33.76633479	-30.55555556	3.21077923	1895530
Chasmanthium latifolium	CHLA5	Graminoid	286	-10.5	-8.3	-30.2271313	-36.11111111	-5.88397981	3990300
Penstemon digitalis	PEDI	Forb/herb	287	-15.2	-10.8	-34.1163659	-38.88888889	-4.77252299	2129470
Carex saxatilis	CASA10	Graminoid	288	-39.6	-35.2	-60	-33.33333333	26.66666667	5184550
Scirpus atrovirens	SCAT2	Graminoid	288	-22.1	-13.43	-38.2078407	-47.22222222	-9.01438152	4240450
Ulmus rubra	ULRU	Tree	289	-15.2	-11.36	-34.98755445	-41.66666667	-6.67911222	5364170
Rubus occidentalis	RUOC	Subshrub	290	-20.1	-16	-42.20597386	-33.33333333	8.87264053	3077900
Salix eriocephala	SAER	Tree, Shrub	291	-22.3	-19.2	-47.18419415	-38.88888889	8.29530526	5116440
Carex crinita	CACR6	Graminoid	291	-19.4	-13.5	-38.31673927	-36.11111111	2.20562816	2436010
Bidens aristosa	BIAR	Forb/herb	291	-13.5	-10.1	-33.02738021	11.11111111	44.13849132	1982510
Pedicularis canadensis	PECA	Subshrub, Forb/herb	292	-19.8	-14.2	-39.40572495	-41.66666667	-2.26094172	3645430
Festuca subverticillata	FESU3	Graminoid	292	-21.3	-11.8	-35.67205974	-41.66666667	-5.99460693	2807890
Alnus serrulata	ALSE2	Tree, Shrub	292	-15.4	-9.7	-32.40510268	-30.55555556	1.84954712	3509980
Ranunculus repens	RARE3	Forb/herb	293	-27.8	-13.9	-38.9390168	-33.33333333	5.60568347	7039900
Viola pubescens	VIPU3	Forb/herb	293	-18.6	-13.08	-37.66334785	-36.11111111	1.55223674	2302320
Hierochloe odorata	HIOD	Graminoid	294	-39.6	-31.77	-60	-38.88888889	21.11111111	6416260
Carex luzulina	CALU7	Graminoid	294	-19.2	-15.17	-40.91474798	-36.11111111	4.80363687	1378000
Ericameria pinifolia	ERPI7	Shrub	294	-6.1	-2.8	-21.67081518	-1.666666667	20.00414851	46034
Cinna latifolia	CILA2	Graminoid	295	-22.1	-18.23	-45.67517113	-38.88888889	6.78628224	5489600
Polemonium occidentale	POOC2	Forb/herb	295	-39.6	-18.2	-45.62850031	-41.66666667	3.96183364	2431490
Stipa thurberiana	ACTH7	Graminoid	295	-17.9	-10.5	-33.64965775	-30.55555556	3.09410219	999723
Quercus muehlenbergii	QUMU	Tree	295	-13.6	-10.33	-33.38518979	-36.11111111	-2.72592132	4643400
Hydrophyllum occidentale	HYOC	Forb/herb	295	-14.4	-10.1	-33.02738021	-27.77777778	5.24960243	824012
Amsinckia lycopsoides	AMLY	Forb/herb	295	-22.7	-8.2	-30.07156192	-33.33333333	-3.26177141	4695630
Passiflora lutea	PALU2	Vine, Forb/herb	295	-12.4	-7.7	-29.293715	-30.55555556	-1.26184056	2158860
Astragalus canadensis	ASCA11	Forb/herb	296	-22.8	-18.925	-46.75637834	-38.88888889	7.86748945	5234400
Leersia virginica	LEVI2	Graminoid	296	-15.1	-10.925	-34.31082763	-41.66666667	-7.35583904	2460740
Campsis radicans	CARA2	Vine	296	-13.3	-9.75	-32.48288737	-25	7.48288737	6378190
Andropogon glomeratus	ANGL2	Graminoid	297	-8.5	-5.02	-25.12445551	-30.55555556	-5.43110005	5311950
Scolochloa festucacea	SCFE	Graminoid	299	-38.2	-14.37	-39.67019291	-38.88888889	0.78130402	7944870
Sisyrinchium idahoense	SIID	Forb/herb	300	-21.4	-15.2	-40.96141879	-38.88888889	2.0725299	2097040
Prunus americana	PRAM	Tree, Shrub	300	-16.7	-12.905	-37.39110143	-38.88888889	-1.49778746	4998910
Rosa carolina	ROCA4	Subshrub	300	-19.9	-11.3	-34.89421282	-41.66666667	-6.77245385	2782650
Quercus stellata	QUST	Tree	300	-11.1	-8.405	-30.39047915	-36.11111111	-5.72063196	4394990
Hedera helix	HEHE	Vine	300	-11.5	-7.9	-29.60485376	-30.55555556	-0.9507018	6744250
Typha angustifolia	TYAN	Forb/herb	301	-19.9	-13.9	-38.9390168	-36.11111111	2.82790569	6541000
Carya ovata	CAOV2	Tree	301	-15.4	-13.8	-38.78344742	-40	-1.21655258	3586860
Tsuga mertensiana	TSME	Tree	301	-19.5	-12.2	-36.29433727	-27.77777778	8.51655949	1933210
Chondrosum eriopodum	BOER4	Graminoid	301	-12.4	-8.3	-30.2271313	-30.55555556	-0.32842426	1060940
Juncus castaneus	JUCA6	Graminoid	302	-39.6	-35.58	-60	-38.88888889	21.11111111	2617650
Glyceria borealis	GLBO	Graminoid	302	-33	-21.98	-60	-36.11111111	23.88888889	5921800
Oenothera biennis	OEBI	Forb/herb	302	-21.1	-13.445	-38.2311761	-33.33333333	4.89784277	7119120
Artemisia arbuscula	ARAR8	Subshrub, Shrub	303	-18.6	-16.88	-43.57498444	-41.66666667	1.90831777	1798470
Carex lupulina	CALU4	Graminoid	303	-17.8	-12.27	-36.40323584	-38.88888889	-2.48565305	2607910
Artemisia cana	ARCA13	Subshrub, Shrub	304	-21.4	-17.37	-44.33727442	-41.66666667	2.67060775	1926220
Schoenoplectus californicus	SCCA11	Graminoid	304	-9.6	0.015	-17.29153703	-8.333333333	8.958203697	3552920
Stipa lettermanii	ACLE9	Graminoid	306	-21.1	-18.175	-45.58960797	-33.33333333	12.25627464	1861200
Muhlenbergia montana	MUMO	Graminoid	306	-21.1	-17	-43.7616677	-38.88888889	4.87277881	1612000
Salix barclayi	SABA3	Tree, Shrub	307	-35.6	-28.07	-60	-41.66666667	18.33333333	1379480
Cytisus scoparius	CYSC4	Shrub	307	-10	-6.8	-27.89359054	-25	2.89359054	5623340
Hypericum punctatum	HYPU	Forb/herb	308	-17.6	-10.53	-33.69632856	-36.11111111	-2.41478255	1989870
Muhlenbergia porteri	MUPO2	Graminoid	308	-10.3	-6.165	-26.90572495	-11.11111111	15.79461384	854682
Salix reticulata	SARE2	Subshrub, Shrub	309	-39.5	-35.96	-60	-52.22222222	7.77777778	5313800
Acer pensylvanicum	ACPE	Tree, Shrub	309	-18.1	-15.8	-41.8948351	-43.88888889	-1.99405379	864553
Ulmus pumila	ULPU	Tree, Shrub	309	-18.1	-11.12	-34.61418793	-38.88888889	-4.27470096	5767570
Aralia nudicaulis	ARNU2	Subshrub, Forb/herb	310	-23.1	-17.965	-45.26291226	-38.88888889	6.37402337	3438860
Viburnum acerifolium	VIAC	Shrub, Subshrub	310	-17	-13.5	-38.31673927	-33.33333333	4.98340594	2024710
Erigeron linearis	ERLI	Forb/herb	310	-19.5	-10.955	-34.35749844	-30.55555556	3.80194288	548159
Phlox divaricata	PHDI5	Forb/herb	310	-17.7	-10.8	-34.1163659	-36.11111111	-1.99474521	2180390
Gentiana calycosa	GECA	Forb/herb	311	-19.8	-17.8	-45.00622278	-13.88888889	31.11733389	1686970
Solidago rugosa	SORU2	Forb/herb	311	-19.3	-12	-35.98319851	-36.11111111	-0.1279126	2199870
Peritoma serrulata	CLSE	Forb/herb	312	-21.1	-16.045	-42.27598009	11.11111111	53.3870912	3283020
Pinus albicaulis	PIAL	Tree	312	-19.2	-14	-39.09458619	-50	-10.90541381	2693750
Sisyrinchium angustifolium	SIAN3	Forb/herb	312	-21	-11.19	-34.7230865	-19.44444444	15.27864206	5503490
Symphoricarpos orbiculatus	SYOR	Shrub	312	-13	-10.445	-33.56409459	-30.55555556	3.00853903	2115710
Osmunda cinnamomea	OSCI	Forb/herb	313	-19.9	-11.74	-35.57871811	-36.11111111	-0.532393	2501470
Maclura pomifera	MAPO	Tree, Shrub	313	-11.8	-10.34	-33.40074673	-30.55555556	2.84519117	5781130
Ruellia humilis	RUHU	Forb/herb	314	-11.8	-10.035	-32.92626011	-36.11111111	-3.184851	1331940
Coleogyne ramosissima	CORA	Shrub	316	-11.6	-9.075	-31.43279403	-27.77777778	3.65501625	519057
Tripsacum dactyloides	TRDA3	Graminoid	317	-11.1	-9.22	-31.65836963	-30.55555556	1.10281407	4040560
Berberis nervosa	MANE2	Subshrub, Shrub	318	-9.5	-7.7	-29.293715	-27.77777778	1.51593722	2443320
Rubus arcticus	RUAR	Subshrub, Forb/herb	319	-35.6	-32.32	-60	-52.22222222	7.77777778	2636200
Delphinium andersonii	DEAN	Forb/herb	320	-17.8	-14.61	-40.04355943	-27.77777778	12.26578165	944531
Philadelphus microphyllus	PHMI4	Shrub	323	-16.6	-14.1	-39.25015557	-30.55555556	8.69460001	1750670
Eragrostis hypnoides	ERHY	Graminoid	324	-20.4	-11.2	-34.73864343	-38.88888889	-4.15024546	6717550
Morella californica	MOCA6	Tree, Shrub	324	-8.2	1.015	-15.73584319	-5.555555556	10.18028763	427664
Berberis repens	MARE11	Subshrub, Shrub	325	-20.5	-17.12	-43.94835096	-30.55555556	13.3927954	2546400
Chamaebatiaria millefolium	CHMI2	Shrub	325	-19	-12.66	-37.00995644	-30.55555556	6.45440088	993069
Hedysarum boreale	HEBO	Forb/herb	326	-39.6	-34.3	-60	-38.88888889	21.11111111	3787930
Kalmia polifolia	KAPO	Shrub	327	-20.8	-15.87	-42.00373367	-33.33333333	8.67040034	3897140
Fallugia paradoxa	FAPA	Shrub	327	-17.7	-9.9	-32.71624144	-30.55555556	2.16068588	920089
Carex scirpoidea	CASC10	Graminoid	328	-39.6	-35.265	-60	-38.88888889	21.11111111	5751110
Buchloe dactyloides	BUDA		328	-20.9	-14.23	-39.45239577	-38.88888889	0.56350688	3069220
Ceanothus americanus	CEAM	Subshrub, Shrub	329	-17.2	-11.42	-35.08089608	-33.33333333	1.74756275	4217970
Delphinium glaucum	DEGL3	Forb/herb	330	-35.8	-32.855	-60	-33.33333333	26.66666667	2609610
Rosa pisocarpa	ROPI2	Subshrub	330	-10.8	-6.8	-27.89359054	-31.11111111	-3.21752057	1890350
Empetrum nigrum	EMNI	Subshrub, Shrub	331	-39.6	-34.8	-60	-41.66666667	18.33333333	4269590
Paeonia brownii	PABR	Forb/herb	331	-17.7	-12.95	-37.46110765	-30.55555556	6.90555209	1015620
Dulichium arundinaceum	DUAR3	Graminoid	333	-22.2	-13.04	-37.6011201	-38.88888889	-1.28776879	6680560
Potamogeton crispus	POCR3	Forb/herb	333	-14.6	-12.84	-37.28998133	-36.11111111	1.17887022	6906340
Hieracium scouleri	HISC2	Forb/herb	334	-18.9	-14.7	-40.18357187	-36.11111111	4.07246076	920191
Elaeagnus angustifolia	ELAN	Tree, Shrub	335	-21.4	-15.09	-40.79029247	-38.88888889	1.90140358	5772520
Phalaris aquatica	PHAQ	Graminoid	335	-4.1	-0.13	-17.51711263	-13.88888889	3.62822374	915361
Carex douglasii	CADO2	Graminoid	336	-21.5	-16.1	-42.36154325	-36.11111111	6.25043214	2515970
Crataegus douglasii	CRDO2	Tree, Shrub	336	-19.4	-15.925	-42.08929683	-43.88888889	-1.79959206	4136730
Pinus monticola	PIMO3	Tree	336	-16.3	-9.3	-31.78282514	-36.11111111	-4.32828597	2631790
Carex filifolia	CAFI	Graminoid	337	-34.5	-25.64	-60	-38.88888889	21.11111111	3783090
Astragalus mollissimus	ASMOM5	Forb/herb	338	-16.3	-13.215	-37.87336652	-33.33333333	4.54003319	1872110
Penstemon eatonii	PEEA	Forb/herb	338	-15.1	-12.8	-37.22775358	-36.11111111	1.11664247	806832
Cressa truxillensis	CRTR5	Subshrub, Forb/herb	338	-11.5	-7.6	-29.13814561	-25	4.13814561	1982620
Liriodendron tulipifera	LITU	Tree	339	-11.8	-9.5	-32.09396391	-27.77777778	4.31618613	5529360
Danthonia intermedia	DAIN	Graminoid	340	-25.6	-18.805	-46.56969508	-36.11111111	10.45858397	2500040
Agrostis perennans	AGPE	Graminoid	340	-17.8	-11.81	-35.68761668	-36.11111111	-0.42349443	5697790
Eriogonum marifolium	ERMA4	Subshrub, Forb/herb	340	-13.5	-9.4	-31.93839452	-27.77777778	4.16061674	503114
Helianthus tuberosus	HETU	Forb/herb	341	-19.9	-14.7	-40.18357187	-41.66666667	-1.4830948	5929860
Penthorum sedoides	PESE6	Forb/herb	341	-15.4	-11.5	-35.20535159	-33.33333333	1.87201826	4088970
Scirpus cyperinus	SCCY	Graminoid	342	-22.1	-14.295	-39.55351587	-36.11111111	3.44240476	6168140
Sarcobatus vermiculatus	SAVE4	Shrub	345	-20	-14.6	-40.02800249	-38.88888889	1.1391136	2105900
Desmanthus illinoensis	DEIL	Subshrub, Forb/herb	345	-12.8	-10.8	-34.1163659	-27.77777778	6.33858812	2507100
Rhus copallinum	RHCO	Tree, Shrub	345	-12.7	-9.5	-32.09396391	-33.33333333	-1.23936942	3992720
Symphyotrichum lateriflorum	SYLAL7	Forb/herb	347	-14.7	-11.7	-35.51649035	-38.88888889	-3.37239854	4368020
Andropogon virginicus	ANVI2	Graminoid	347	-11.3	-8.4	-30.38270068	-27.77777778	2.6049229	5504050
Symphyotrichum chilense	SYCHC	Forb/herb	347	-16.3	-5.61	-26.04231487	-33.33333333	-7.29101846	1697520
Hesperis matronalis	HEMA3	Forb/herb	348	-27.6	-15	-40.65028002	-30.55555556	10.09472446	5495740
Najas flexilis	NAFL	Forb/herb	349	-32.8	-22.98	-60	8.333333333	68.33333333	5069780
Menyanthes trifoliata	METR3	Forb/herb	350	-39.6	-32.51	-60	-36.11111111	23.88888889	6356110
Antennaria dimorpha	ANDI2	Subshrub, Forb/herb	350	-20.2	-15.21	-40.97697573	-38.88888889	2.08808684	1891820
Bidens tripartita	BITR	Forb/herb	351	-28.1	-19.9	-48.27317984	8.333333333	56.60651317	5643950
Castilleja hispida	CAHI9	Subshrub, Forb/herb	351	-17.3	-13	-37.53889235	-30	7.53889235	676458
Ranunculus hispidus	RAHI	Forb/herb	351	-18.3	-11.3	-34.89421282	-36.11111111	-1.21689829	2485330
Arctagrostis latifolia	ARLA2	Graminoid	353	-39.6	-35.9	-60	-38.88888889	21.11111111	1414320
Bromus vulgaris	BRVU	Graminoid	353	-18.3	-11.02	-34.45861854	-30.55555556	3.90306298	1818640
Dryas octopetala	DROC	Subshrub, Shrub, Forb/herb	354	-38.2	-35.335	-60	-52.22222222	7.77777778	2569070
Clarkia gracilis	CLGR	Forb/herb	354	-9.5	-8.1	-29.91599253	11.11111111	41.02710364	298281
Acer circinatum	ACCI	Tree, Shrub, Vine	354	-10.3	-6.9	-28.04915993	-25	3.04915993	1901820
Hippuris vulgaris	HIVU2	Forb/herb	355	-39.6	-33.73	-60	-38.88888889	21.11111111	6439280
Sagina saginoides	SASA	Forb/herb	355	-28.5	-16.8	-43.45052894	-36.11111111	7.33941783	3093620
Erigeron eatonii	EREA	Forb/herb	355	-21.8	-16.56	-43.07716241	-27.77777778	15.29938463	1488020
Ranunculus glaberrimus	RAGL	Forb/herb	355	-17.7	-15.5	-41.42812694	-41.66666667	-0.23853973	1908120
Briza maxima	BRMA	Graminoid	356	-9.5	-0.5	-18.09271935	8.333333333	26.42605268	4314060
Berula erecta	BEER	Forb/herb	357	-21.2	-12.3	-36.44990666	-36.11111111	0.33879555	4867730
Triticum aestivum	TRAE	Graminoid	357	-18	-10.26	-33.27629123	-33.33333333	-0.0570421	7314530
Quercus macrocarpa	QUMA2	Tree, Shrub	358	-22.5	-16.735	-43.34940884	-38.88888889	4.46051995	5372420
Nyssa sylvatica	NYSY	Tree	359	-13.7	-11	-34.42750467	-27.77777778	6.64972689	4353570
Potentilla diversifolia	PODI2	Forb/herb	361	-30.8	-20.1	-48.58431861	-36.11111111	12.4732075	2482370
Symphoricarpos oreophilus	SYOR2	Shrub	361	-21.6	-16.9	-43.60609832	-36.11111111	7.49498721	2036860
Helenium autumnale	HEAU	Forb/herb	364	-22.2	-15.005	-40.65805849	-41.66666667	-1.00860818	6164420
Sambucus nigra	SANIC5	Shrub, Tree	365	-15.2	-10.44	-33.55631612	-38.88888889	-5.33257277	6987410
Quercus velutina	QUVE	Tree	366	-15.1	-11.575	-35.32202862	-34.44444444	0.87758418	2105720
Salix orestera	SAOR	Shrub	367	-13.1	-10.6	-33.80522713	-30.55555556	3.24967157	337317
Celtis reticulata	CELAR	Tree, Shrub	367	-14.4	-10.37	-33.44741755	-41.11111111	-7.66369356	2767860
Shepherdia canadensis	SHCA	Shrub	368	-36.8	-33.8	-60	-52.77777778	7.22222222	5077020
Danthonia unispicata	DAUN	Graminoid	368	-18.9	-15.095	-40.79807094	-32.22222222	8.57584872	1753200
Heuchera cylindrica	HECY2	Forb/herb	368	-19.2	-14.7	-40.18357187	-25	15.18357187	1304700
Stellaria nitens	STNI	Forb/herb	368	-14.2	-6.5	-27.42688239	8.333333333	35.76021572	1517490
Cardamine pensylvanica	CAPE3	Forb/herb	370	-20.8	-14.4	-39.71686372	-36.11111111	3.60575261	7683230
Pluchea odorata	PLODO	Subshrub, Forb/herb	370	-9.2	-7.6	-29.13814561	-25	4.13814561	5035900
Mertensia ciliata	MECI3	Forb/herb	371	-21.6	-19.2	-47.18419415	-30.55555556	16.62863859	1745710
Balsamorhiza sagittata	BASA3	Forb/herb	371	-21.4	-16.9	-43.60609832	-38.88888889	4.71720943	2199040
Lespedeza capitata	LECA8	Forb/herb	371	-17.9	-11	-34.42750467	-33.33333333	1.09417134	2683480
Rudbeckia laciniata	RULA3	Subshrub, Forb/herb	374	-22.6	-15.335	-41.17143746	-38.88888889	2.28254857	5366950
Opuntia polyacantha	OPPO	Shrub	374	-19.5	-15.035	-40.70472931	-33.33333333	7.37139598	2495690
Spirodela polyrrhiza	SPPO	Forb/herb	374	-22.1	-12.935	-37.43777225	-38.88888889	-1.45111664	7758380
Eriogonum sphaerocephalum	ERSP7	Subshrub, Shrub	374	-14.3	-11.3	-34.89421282	-30.55555556	4.33865726	489586
Potamogeton gramineus	POGR8	Forb/herb	375	-33.9	-28.69	-60	-38.88888889	21.11111111	5911400
Eragrostis spectabilis	ERSP	Graminoid	376	-18.7	-10.4	-33.49408836	-41.66666667	-8.17257831	4416950
Ailanthus altissima	AIAL	Tree	376	-15	-9.425	-31.97728687	-27.77777778	4.19950909	5975950
Lupinus sericeus	LUSE4	Subshrub, Forb/herb	377	-21.1	-18.14	-45.53515868	-33.33333333	12.20182535	1681430
Pinus flexilis	PIFL2	Tree	378	-21.6	-16.6	-43.13939017	-41.66666667	1.4727235	4340810
Antennaria neglecta	ANNE	Forb/herb	378	-22.8	-14.13	-39.29682638	-38.88888889	0.40793749	4883340
Ostrya virginiana	OSVI	Tree, Shrub	379	-18.6	-15	-40.65028002	-38.88888889	1.76139113	3888890
Hamamelis virginiana	HAVI4	Tree, Shrub	379	-16.2	-14.2	-39.40572495	-33.33333333	6.07239162	4330750
Coreopsis tinctoria	COTI3	Forb/herb	381	-19.9	-13.8	-38.78344742	11.11111111	49.89455853	7018970
Pinus lambertiana	PILA	Tree	381	-9.3	-7.4	-28.82700685	-33.33333333	-4.50632648	2838820
Ceanothus megacarpus	CEME	Shrub	381	-0.2	3.3	-12.18108276	-4.444444444	7.736638316	130810
Ammannia coccinea	AMCO	Forb/herb, Subshrub	382	-18.3	-8.8	-31.00497822	-38.88888889	-7.88391067	6382970
Symphoricarpos occidentalis	SYOC	Shrub	383	-22.6	-20	-48.42874922	-37.77777778	10.65097144	3815890
Boehmeria cylindrica	BOCY	Forb/herb	384	-15.3	-10.585	-33.78189172	-36.11111111	-2.32921939	4753530
Alnus rubra	ALRU2	Tree	384	-16.4	-5.985	-26.62570006	-30	-3.37429994	773961
Echinochloa colona	ECCO2	Graminoid	384	-11.4	-5.885	-26.47013068	2.777777778	29.24790846	6602730
Pinus sabiniana	PISA2	Tree	384	-7	-3.47	-22.71313006	-11.11111111	11.60201895	290117
Platanus occidentalis	PLOC	Tree	385	-15.2	-14.3	-39.56129434	-36.66666667	2.89462767	6858220
Armeria maritima	ARMA6	Subshrub, Forb/herb	386	-39	-32.9	-60	-33.33333333	26.66666667	3213300
Arnica latifolia	ARLA8	Forb/herb	388	-30	-19.995	-48.42097075	-36.11111111	12.30985964	2155340
Callitriche palustris	CAPA52	Forb/herb	389	-33.5	-27.9	-60	-36.11111111	23.88888889	6876570
Cornus drummondii	CODR	Tree, Shrub	389	-16.8	-10.6	-33.80522713	-33.33333333	0.4718938	2523370
Pinus jeffreyi	PIJE	Tree	389	-11.1	-9.3	-31.78282514	-38.88888889	-7.10606375	369525
Taxus brevifolia	TABR2	Tree	390	-15.2	-8.255	-30.15712508	-27.77777778	2.3793473	2985110
Vaccinium membranaceum	VAME	Shrub	391	-17.5	-14.5	-39.87243311	-38.88888889	0.98354422	2028890
Pennisetum setaceum	PESE3	Graminoid	391	-7.4	-0.2	-17.6260112	-8.333333333	9.292677867	3872320
Hypoxis hirsuta	HYHI2	Forb/herb	392	-21.6	-13.2	-37.85003111	-36.11111111	1.73892	4108660
Gleditsia triacanthos	GLTR	Tree, Shrub	392	-18.1	-10.645	-33.87523335	-37.77777778	-3.90254443	6664340
Lupinus albicaulis	LUAL3	Forb/herb	392	-12.4	-8.3	-30.2271313	8.333333333	38.56046463	632591
Boechera stricta	ARDR	Forb/herb	393	-32.7	-19.74	-48.02426882	-38.88888889	9.13537993	5000690
Paspalum dilatatum	PADI3	Graminoid	394	-10.6	-3.8	-23.22650902	-19.44444444	3.78206458	5527220
Kalmia latifolia	KALA	Tree, Shrub	395	-17.8	-12	-35.98319851	-30.55555556	5.42764295	4362870
Lonicera japonica	LOJA	Vine	395	-13.5	-8.69	-30.8338519	-25	5.8338519	7204530
Festuca californica	FECA	Graminoid	395	-9.7	-6.1	-26.80460485	-13.88888889	12.91571596	383869
Agrostis hyemalis	AGHY	Graminoid	397	-22.3	-13.78	-38.75233354	-36.11111111	2.64122243	7205450
Carex vesicaria	CAVE6	Graminoid	398	-20.5	-15.215	-40.9847542	-38.88888889	2.09586531	5113720
Tilia americana	TIAM	Tree	398	-21.9	-15.1	-40.80584941	-43.33333333	-2.52748392	5430850
Juncus drummondii	JUDR	Graminoid	399	-28.5	-19.91	-48.28873678	-38.88888889	9.39984789	2359080
Sphenopholis obtusata	SPOB	Graminoid	400	-21.5	-14.74	-40.24579963	-41.66666667	-1.42086704	6653480
Juglans nigra	JUNI	Tree	401	-19.9	-13.4	-38.16116988	-33.33333333	4.82783655	6155640
Bothriochloa barbinodis	BOBA3	Graminoid	401	-11.2	-6.5	-27.42688239	-16.66666667	10.76021572	1865060
Prunus fasciculata	PRFA	Shrub	401	-11	-5.7	-26.18232732	-11.11111111	15.07121621	485157
Potamogeton natans	PONA4	Forb/herb	402	-34.3	-22.29	-60	-38.88888889	21.11111111	6007390
Hilaria jamesii	PLJA	Graminoid	402	-20.2	-15	-40.65028002	-30.55555556	10.09472446	1147220
Ilex verticillata	ILVE	Tree, Shrub	402	-17.1	-13.995	-39.08680772	-33.33333333	5.75347439	1832990
Quercus gambelii	QUGA	Tree, Shrub	404	-20.1	-15.985	-42.18263846	-41.66666667	0.51597179	1232030
Hypericum mutilum	HYMU	Forb/herb	404	-16.4	-11.3	-34.89421282	-30.55555556	4.33865726	7792930
Ribes inerme	RIIN2	Shrub	406	-22.6	-16.9	-43.60609832	-33.33333333	10.27276499	2757800
Phyllodoce breweri	PHBR4	Subshrub, Shrub	406	-11.2	-10.5	-33.64965775	-19.44444444	14.20521331	134163
Carex bigelowii	CABI5	Graminoid	407	-39.6	-35.9	-60	-41.66666667	18.33333333	4026970
Osmorhiza occidentalis	OSOC	Forb/herb	407	-20.4	-15.3	-41.11698818	-38.88888889	2.22809929	1438740
Acer saccharinum	ACSA2	Tree	407	-18.1	-14.57	-39.98133167	-43.88888889	-3.90755722	6061270
Quercus alba	QUAL	Tree	407	-18.1	-13.87	-38.89234599	-41.66666667	-2.77432068	5622720
Carex scoparia	CASC11	Graminoid	407	-18.1	-13.5	-38.31673927	-38.88888889	-0.57214962	5628950
Erigeron canadensis	COCA5	Forb/herb	408	-15.1	-10.465	-33.59520846	11.11111111	44.70631957	7099830
Lycopodium annotinum	LYAN2	Subshrub, Forb/herb	410	-36	-32.665	-60	-41.66666667	18.33333333	4858310
Sorbus scopulina	SOSC2	Tree, Shrub	410	-31.1	-20.4	-49.05102676	-19.44444444	29.60658232	4615100
Trifolium hybridum	TRHY	Forb/herb	411	-32.5	-24.7	-60	-38.88888889	21.11111111	7250290
Cornus amomum	COAM2	Shrub	411	-15.3	-11.4	-35.0497822	-38.88888889	-3.83910669	2214600
Lindera benzoin	LIBE3	Tree, Shrub	411	-13.1	-10.3	-33.33851898	-30.55555556	2.78296342	1730040
Fraxinus latifolia	FRLA	Tree	411	-8.4	-5	-25.09334163	-22.22222222	2.87111941	491365
Quercus dumosa	QUDU	Tree, Shrub	411	-10.4	-0.95	-18.79278158	-5.555555556	13.23722602	441518
Eriogonum strictum	ERST4	Subshrub, Forb/herb	412	-18.5	-11.3	-34.89421282	-30.55555556	4.33865726	601072
Fouquieria splendens	FOSP2	Shrub	412	-7.5	-2.29	-20.87741133	-19.44444444	1.43296689	475802
Juniperus scopulorum	JUSC2	Tree, Shrub	414	-21.4	-16.835	-43.50497822	-38.88888889	4.61608933	4593610
Phlox longifolia	PHLO2	Subshrub, Forb/herb	414	-19.3	-16.4	-42.8282514	-25	17.8282514	1845930
Carpinus caroliniana	CACA18	Tree, Shrub	415	-18.5	-13.93	-38.98568762	-36.66666667	2.31902095	2589770
Cornus florida	COFL2	Tree, Shrub	415	-13.8	-10.73	-34.00746733	-33.33333333	0.674134	6099110
Melica subulata	MESU	Graminoid	417	-35.6	-9.74	-32.46733043	-36.11111111	-3.64378068	1521200
Leymus condensatus	LECO12	Graminoid	417	-16.3	-2.56	-21.29744866	-38.88888889	-17.59144023	1477220
Viola macloskeyi	VIMA2	Forb/herb	419	-19.5	-14.61	-40.04355943	-33.33333333	6.7102261	5100220
Carex lenticularis var lipocarpa	CALEL3	Graminoid	419	-18.3	-12.7	-37.07218419	-36.11111111	0.96107308	2147780
Juncus marginatus	JUMA4	Graminoid	419	-19.5	-10.3	-33.33851898	-30.55555556	2.78296342	6307640
Cercis canadensis	CECA4	Tree, Shrub	421	-15	-9.92	-32.74735532	-33.33333333	-0.58597801	5289300
Rubus leucodermis	RULE	Vine, Subshrub	422	-13.8	-8.3	-30.2271313	-13.88888889	16.33824241	2053860
Cornus canadensis	COCA13	Subshrub, Shrub, Forb/herb	424	-34.1	-29.4	-60	-33.33333333	26.66666667	5276330
Antennaria microphylla	ANMI3	Forb/herb	426	-33.2	-20.2	-48.73988799	-38.88888889	9.8509991	3008930
Melica bulbosa	MEBU	Graminoid	427	-19.2	-16.7	-43.29495955	-41.66666667	1.62829288	1740630
Carex lurida	CALU5	Graminoid	427	-17.1	-11.9	-35.82762912	-36.11111111	-0.28348199	2147470
Echinacea pallida	ECPA	Forb/herb	427	-22.9	-10.8	-34.1163659	-36.11111111	-1.99474521	2873170
Trifolium hirtum	TRHI4	Forb/herb	427	-8.3	-0.9	-18.71499689	-12.22222222	6.49277467	1852780
Fraxinus americana	FRAM2	Tree	429	-18.1	-15.2	-40.96141879	-36.66666667	4.29475212	4751670
Rosa nutkana	RONU	Subshrub	429	-19.5	-15.16	-40.89919104	-13.88888889	27.01030215	3234670
Acacia greggii	ACGR	Tree, Shrub	430	-9.1	-2.51	-21.21966397	-25	-3.78033603	732038
Carex scopulorum	CASC12	Graminoid	431	-20.1	-16.95	-43.68388301	-38.88888889	4.79499412	1844690
Artemisia tridentata subsp vasey	ARTRV	Tree, Shrub	432	-20.2	-16.7	-43.29495955	-41.66666667	1.62829288	1943930
Allium acuminatum	ALAC4	Forb/herb	432	-17.1	-14.3	-39.56129434	-33.33333333	6.22796101	1762400
Salix pulchra	SAPU15	Subshrub, Shrub, Tree	434	-39.6	-35.135	-60	-52.22222222	7.77777778	1392230
Oenothera pallida	OEPA	Forb/herb	435	-19.7	-13.9	-38.9390168	-38.88888889	0.05012791	2552780
Ptelea trifoliata	PTTR	Tree, Shrub	435	-15	-10.43	-33.54075918	-36.11111111	-2.57035193	4962190
Ribes lacustre	RILA	Shrub	437	-32.6	-17.76	-44.94399502	-52.22222222	-7.2782272	4518610
Osmunda regalis	OSRE	Forb/herb	437	-19.3	-15	-40.65028002	-38.88888889	1.76139113	6132440
Solidago gigantea	SOGI	Forb/herb	437	-20.5	-12.1	-36.13876789	-36.11111111	0.02765678	6131290
Spiranthes romanzoffiana	SPRO	Forb/herb	439	-35.9	-27.24	-60	-38.88888889	21.11111111	5286380
Ranunculus flammula	RAFL2	Forb/herb	439	-39.6	-26.91	-60	-36.11111111	23.88888889	6449390
Astragalus filipes	ASFI	Forb/herb	439	-18	-14.53	-39.91910392	-30.55555556	9.36354836	916888
Spiranthes cernua	SPCE	Forb/herb	439	-17.1	-11.82	-35.70317362	-38.88888889	-3.18571527	2639180
Gaillardia pulchella	GAPU	Subshrub, Forb/herb	439	-27.6	-10.8	-34.1163659	0	34.1163659	7785310
Symphyotrichum foliaceum	SYFOF	Forb/herb	444	-21.6	-17.485	-44.51617922	-38.88888889	5.62729033	4273820
Saponaria officinalis	SAOF4	Forb/herb	445	-20.5	-11.96	-35.92097075	-27.77777778	8.14319297	6424670
Adiantum capillus-veneris	ADCA	Forb/herb	445	-16.4	-7.08	-28.32918482	-36.11111111	-7.78192629	4970980
Tsuga canadensis	TSCA	Tree	446	-18.9	-15.4	-41.27255756	-36.11111111	5.16144645	2157290
Juncus parryi	JUPA	Graminoid	447	-21	-14.7	-40.18357187	-36.11111111	4.07246076	1734230
Juncus acuminatus	JUAC	Graminoid	448	-15.2	-9.465	-32.03951462	-36.11111111	-4.07159649	6807140
Potamogeton epihydrus	POEP2	Forb/herb	449	-32.6	-19.36	-47.43310516	-36.11111111	11.32199405	6543060
Salix lemmonii	SALE	Shrub	451	-12.3	-10.5	-33.64965775	-33.33333333	0.31632442	407008
Morus alba	MOAL	Tree, Shrub	453	-15	-10.64	-33.86745488	-27.77777778	6.0896771	6583820
Physocarpus capitatus	PHCA11	Shrub	454	-12.5	-6.5	-27.42688239	-36.11111111	-8.68422872	922557
Juncus interior	JUIN2	Graminoid	455	-23	-13.82	-38.81456129	-38.88888889	-0.0743276	4793110
Sassafras albidum	SAAL5	Tree, Shrub	455	-13.2	-10	-32.87181083	-32.77777778	0.09403305	4381360
Salix amygdaloides	SAAM2	Tree, Shrub	456	-21.8	-18.325	-45.82296204	-36.11111111	9.71185093	5669230
Solidago nemoralis	SONE	Forb/herb	456	-21.1	-12.325	-36.488799	-36.11111111	0.37768789	4486800
Tridens flavus	TRFL2	Graminoid	456	-14	-10.125	-33.06627256	-30.55555556	2.510717	2522050
Artemisia frigida	ARFR4	Subshrub	457	-36.7	-33	-60	-41.66666667	18.33333333	5887790
Salix geyeriana	SAGE2	Tree, Shrub	458	-21.1	-16.5	-42.98382078	-38.88888889	4.09493189	1676230
Carex blanda	CABL	Graminoid	460	-19.7	-13	-37.53889235	-33.33333333	4.20555902	3550950
Crepis acuminata	CRAC2	Forb/herb	462	-21.2	-15.395	-41.26477909	-38.88888889	2.3758902	1740480
Lomatium dissectum	LODI	Forb/herb	463	-21.8	-14.49	-39.85687617	-13.88888889	25.96798728	1822710
Ranunculus abortivus	RAAB	Forb/herb	463	-19.9	-13.46	-38.25451151	-41.66666667	-3.41215516	5633850
Rubus spectabilis	RUSP	Vine, Subshrub	463	-27	-9.09	-31.45612943	-36.11111111	-4.65498168	711865
Betula occidentalis	BEOC2	Tree, Shrub	464	-35.6	-16.455	-42.91381456	-52.22222222	-9.30840766	3148800
Epilobium glaberrimum	EPGL	Forb/herb	464	-18.1	-11.795	-35.66428127	-22.22222222	13.44205905	1082330
Camassia quamash	CAQU2	Forb/herb	464	-18.3	-11.74	-35.57871811	-33.33333333	2.24538478	1152060
Botrychium virginianum	BOVI	Forb/herb	465	-30	-13.2	-37.85003111	-38.88888889	-1.03885778	7394740
Betula papyrifera	BEPA	Tree	466	-36.9	-30.025	-60	-52.22222222	7.77777778	5637460
Potamogeton nodosus	PONO2	Forb/herb	466	-22.1	-13.275	-37.96670815	-38.88888889	-0.92218074	7288690
Cucurbita foetidissima	CUFO	Vine, Forb/herb	469	-12	-10.2	-33.1829496	-28.88888889	4.29406071	2889030
Erigeron peregrinus	ERPE3	Forb/herb	470	-28.6	-19.8	-48.11761045	-38.88888889	9.22872156	2604350
Phacelia tanacetifolia	PHTA	Forb/herb	470	-9.5	-1.2	-19.18170504	11.11111111	30.29281615	3650600
Penstemon laetus	PELA7	Subshrub, Forb/herb	471	-10.4	-8.3	-30.2271313	-11.11111111	19.11602019	329379
Fraxinus velutina	FRVE2	Tree	471	-10.1	-5.75	-26.26011201	-25	1.26011201	1950630
Chondrosum hirsutum	BOHI2	Graminoid	472	-19.5	-12.745	-37.14219042	-38.88888889	-1.74669847	3600970
Eriophorum angustifolium	ERAN6	Graminoid	474	-39.6	-35.2	-60	-41.66666667	18.33333333	5730560
Geum canadense	GECA7	Forb/herb	474	-19.9	-13.535	-38.37118855	-36.11111111	2.26007744	3407860
Lepidium montanum	LEMO2	Subshrub, Forb/herb	475	-20.7	-15.1	-40.80584941	-36.11111111	4.6947383	1649290
Symphyotrichum laeve	SYLAL3	Forb/herb	477	-22.6	-20.2	-48.73988799	-41.66666667	7.07322132	5828050
Mimulus primuloides	MIPR	Forb/herb	477	-14.9	-10.62	-33.83634101	-36.11111111	-2.2747701	999826
Salix nigra	SANI	Tree	477	-18.1	-10.2	-33.1829496	-50	-16.8170504	7083140
Berberis aquifolium	MAAQ2	Shrub, Subshrub	478	-16.7	-9.415	-31.96172993	-41.66666667	-9.70493674	4953410
Paspalum distichum	PADI6	Graminoid	478	-11.7	-5.6	-26.02675793	-25	1.02675793	6128510
Iris missouriensis	IRMI	Forb/herb	479	-20.5	-16.6	-43.13939017	-33.33333333	9.80605684	2995950
Atriplex lentiformis	ATLE	Subshrub, Shrub	479	-8.7	-1.91	-20.28624767	-13.88888889	6.39735878	496062
Agoseris aurantiaca	AGAU2	Subshrub, Forb/herb	481	-21.1	-17.4	-44.38394524	-36.11111111	8.27283413	2289900
Caltha palustris	CAPA5	Forb/herb	482	-39.6	-33.795	-60	-38.88888889	21.11111111	5207790
Spiraea douglasii	SPDO	Shrub	482	-26.9	-9.195	-31.61947729	-30.55555556	1.06392173	4091380
Veratrum californicum	VECA2	Forb/herb	483	-21	-15.59	-41.56813939	-38.88888889	2.6792505	2280190
Claytonia sibirica	CLSIS	Forb/herb	483	-20.7	-9.92	-32.74735532	-41.66666667	-8.91931135	1279030
Carex stipata	CAST5	Graminoid	485	-22.3	-13.8	-38.78344742	-38.88888889	-0.10544147	6797290
Parnassia palustris	PAPA8	Forb/herb	486	-39.6	-33.9	-60	-38.88888889	21.11111111	4724160
Vaccinium corymbosum	VACO	Shrub	486	-16.4	-11.5	-35.20535159	-36.11111111	-0.90575952	6258560
Vaccinium parvifolium	VAPA	Shrub	486	-11.5	-5.8	-26.3378967	-25	1.3378967	672480
Simmondsia chinensis	SICH	Shrub	486	-8.3	-0.2	-17.6260112	-19.44444444	-1.81843324	812280
Ribes montigenum	RIMO2	Shrub	488	-20.4	-16.73	-43.34163037	-19.44444444	23.89718593	1998360
Lupinus lepidus	LULE2	Forb/herb	488	-21.8	-12.565	-36.86216553	-27.77777778	9.08438775	1565360
Setaria pumila	SEPU8	Graminoid	489	-21.5	-10.1	-33.02738021	11.11111111	44.13849132	6826600
Rhamnus purshiana	FRPU7	Tree, Shrub	490	-13.7	-7.955	-29.69041693	-19.44444444	10.24597249	3590540
Spartina pectinata	SPPE	Graminoid	491	-23.6	-19.25	-47.26197884	-38.88888889	8.37308995	4862140
Chamaecrista fasciculata	CHFA2	Forb/herb	491	-15.3	-10.55	-33.72744244	-19.44444444	14.282998	3168330
Lupinus arboreus	LUAR	Subshrub, Shrub	491	-11.8	1.4	-15.13690106	-5.555555556	9.581345504	789347
Acer saccharum	ACSA3	Tree, Shrub	492	-22.8	-15.4	-41.27255756	-43.88888889	-2.61633133	6402520
Agastache urticifolia	AGUR	Subshrub, Forb/herb	492	-21	-15.145	-40.87585563	-36.11111111	4.76474452	1519120
Cyperus erythrorhizos	CYER2	Graminoid	492	-19.9	-11.36	-34.98755445	2.777777778	37.76533223	6372160
Carex aurea	CAAU3	Graminoid	494	-35.9	-26.535	-60	-36.11111111	23.88888889	6618020
Amorpha canescens	AMCA6	Subshrub, Shrub	494	-21.9	-18.27	-45.73739888	-38.88888889	6.84850999	3026810
Crepis occidentalis	CROC	Forb/herb	494	-21.4	-15.335	-41.17143746	-30.55555556	10.6158819	2526020
Pedicularis groenlandica	PEGR2	Forb/herb	495	-20.8	-18.1	-45.47293093	-36.11111111	9.36181982	1972180
Ranunculus sceleratus	RASC3	Forb/herb	496	-32.9	-15.45	-41.35034225	11.11111111	52.46145336	7927060
Carex echinata	CAEC	Graminoid	496	-22.9	-15.075	-40.76695706	-38.88888889	1.87806817	7640060
Sorghastrum nutans	SONU2	Graminoid	497	-21.6	-12.62	-36.94772869	-38.88888889	-1.9411602	5088380
Hydrophyllum capitatum	HYCA4	Forb/herb	499	-21.4	-16.01	-42.2215308	-33.33333333	8.88819747	1271910
Arctostaphylos columbiana	ARCO3	Tree, Shrub	500	-8.2	-3.215	-22.31642813	-13.88888889	8.42753924	308887
Acer rubrum	ACRU	Tree	501	-21.6	-15.6	-41.58369633	-43.88888889	-2.30519256	7504010
Purshia glandulosa	PUGL2	Shrub	501	-12.8	-9.1	-31.47168637	-25	6.47168637	585111
Eleocharis obtusa	ELOB2	Graminoid	502	-17.7	-11.395	-35.04200373	2.777777778	37.81978151	7543150
Arnica chamissonis	ARCH3	Forb/herb	503	-24.7	-15.28	-41.0858743	-36.11111111	4.97476319	4706190
Sequoia sempervirens	SESE3	Tree	505	-10.1	0.9	-15.91474798	-13.88888889	2.02585909	6780390
Symphyotrichum pilosum	SYPIP3	Forb/herb	506	-15	-11	-34.42750467	-36.11111111	-1.68360644	4179170
Carex canescens	CACA11	Graminoid	507	-35.5	-28.77	-60	-36.11111111	23.88888889	6085000
Pinus strobus	PIST	Tree	507	-22.1	-15.6	-41.58369633	-36.11111111	5.47258522	4098490
Microseris nutans	MINU	Forb/herb	507	-18.9	-13.87	-38.89234599	-33.33333333	5.55901266	1697530
Juniperus osteosperma	JUOS	Tree	508	-21	-13.93	-38.98568762	-33.33333333	5.65235429	1201850
Bromus ciliatus	BRCI2	Graminoid	509	-31.1	-18.12	-45.5040448	-19.44444444	26.05960036	7554250
Agrostis idahoensis	AGID	Graminoid	511	-20.4	-10.8	-34.1163659	-38.88888889	-4.77252299	4558960
Arctostaphylos pungens	ARPU5	Shrub, Subshrub	511	-11.5	-6.1	-26.80460485	-5.555555556	21.24904929	1437050
Lomatium triternatum	LOTR2	Forb/herb	513	-20.2	-14.7	-40.18357187	-36.11111111	4.07246076	1527410
Acalypha virginica	ACVI	Forb/herb	514	-15.4	-10.2	-33.1829496	0.555555556	33.73850516	2294590
Veronica wormskjoldii	VEWO2	Forb/herb	517	-35.1	-22.54	-60	-33.33333333	26.66666667	5329550
Schoenoplectus tabernaemontani	SCTA2	Graminoid	517	-27.6	-13.54	-38.37896702	-38.88888889	-0.50992187	8159940
Oxytropis lambertii	OXLA3	Forb/herb	518	-21.6	-18.615	-46.27411325	-38.88888889	7.38522436	2006770
Adiantum pedatum	ADPE	Forb/herb	519	-17.8	-15	-40.65028002	-38.88888889	1.76139113	5746120
Atriplex polycarpa	ATPO	Shrub	519	-10.8	-3.64	-22.97759801	-13.88888889	9.08870912	527702
Lemna minor	LEMI3	Forb/herb	520	-33.3	-22.22	-60	-38.88888889	21.11111111	7884760
Teucrium canadense	TECA3	Forb/herb	520	-21.5	-11.21	-34.75420037	-41.66666667	-6.9124663	6624250
Gaultheria shallon	GASH	Subshrub, Shrub	523	-11.5	-3.77	-23.17983821	-13.88888889	9.29094932	688243
Cardamine oligosperma	CAOL	Forb/herb	526	-15.2	-7.925	-29.64374611	-30.55555556	-0.91180945	1499560
Salix interior	SAIN3	Shrub, Tree	527	-33.8	-26.9	-60	-52.22222222	7.77777778	4990810
Ulmus americana	ULAM	Tree	527	-21.9	-15.27	-41.07031736	-43.33333333	-2.26301597	7357180
Euthamia occidentalis	EUOC4	Forb/herb	528	-17.9	-9.165	-31.57280647	-33.33333333	-1.76052686	2301210
Brassica rapa	BRRA	Forb/herb	532	-36.4	-15.18	-40.93030492	-25	15.93030492	8969380
Mirabilis multiflora	MIMU	Forb/herb, Subshrub	532	-17.6	-10.645	-33.87523335	-27.77777778	6.09745557	988339
Oemleria cerasiformis	OECE	Tree, Shrub	532	-8.2	-3.5	-22.75980087	-2.222222222	20.53757865	509485
Atriplex confertifolia	ATCO	Subshrub, Shrub	533	-17.5	-14.34	-39.62352209	-38.88888889	0.7346332	1989770
Carex rossii	CARO5	Graminoid	534	-33.6	-22.815	-60	-36.11111111	23.88888889	2835980
Celastrus scandens	CESC	Vine	534	-22.1	-14.57	-39.98133167	-38.88888889	1.09244278	5123460
Parthenocissus quinquefolia	PAQU2	Vine	535	-19.9	-13.02	-37.57000622	-33.33333333	4.23667289	7119500
Ranunculus eschscholtzii	RAES	Forb/herb	538	-35.5	-22	-60	-36.11111111	23.88888889	3204490
Quercus vacciniifolia	QUVA	Shrub	539	-10	-8.7	-30.84940884	-33.33333333	-2.48392449	138820
Anemopsis californica	ANCA10	Forb/herb	539	-13.8	-8.15	-29.99377722	-5.555555556	24.43822166	2106300
Geranium richardsonii	GERI	Forb/herb	543	-21	-17.29	-44.21281892	-38.88888889	5.32393003	2197970
Juncus mertensianus	JUME3	Graminoid	544	-28.5	-19.485	-47.62756689	-36.11111111	11.51645578	2834620
Hypericum anagalloides	HYAN2	Forb/herb	545	-17.7	-10.06	-32.96515246	8.333333333	41.29848579	1637660
Circaea alpina	CIAL	Forb/herb	546	-34	-17.55	-44.61729932	-38.88888889	5.72841043	7081290
Geum triflorum	GETR	Forb/herb	547	-22.1	-19.37	-47.4486621	-38.88888889	8.55977321	3855740
Liatris punctata	LIPU	Forb/herb	547	-19.7	-12	-35.98319851	-41.66666667	-5.68346816	2118240
Solidago missouriensis	SOMI2	Forb/herb	548	-21.8	-15.3	-41.11698818	-38.88888889	2.22809929	4444380
Ephedra nevadensis	EPNE	Subshrub, Shrub	548	-12.7	-9.2	-31.62725576	-25	6.62725576	3673160
Agoseris glauca	AGGL	Forb/herb, Shrub, Subshrub	553	-22.7	-19.7	-47.96204107	-36.11111111	11.85092996	3492130
Sphaeralcea coccinea	SPCO	Subshrub, Forb/herb	553	-21.5	-16.2	-42.51711263	-30.55555556	11.96155707	4546660
Festuca occidentalis	FEOC	Graminoid	553	-16.3	-9.54	-32.15619166	-41.66666667	-9.51047501	3373540
Quercus rubra	QURU	Tree	555	-22.8	-15.1	-40.80584941	-37.22222222	3.58362719	5635760
Lotus corniculatus	LOCO6	Forb/herb	555	-31.1	-13.5	-38.31673927	-41.66666667	-3.3499274	7234360
Persicaria hydropiperoides	POHY2	Forb/herb	556	-16.4	-10.4	-33.49408836	0	33.49408836	7409860
Callitriche heterophylla	CAHE3	Forb/herb	559	-34.7	-11.53	-35.2520224	-36.11111111	-0.85908871	7960810
Rhus glabra	RHGL	Tree, Shrub	559	-18.1	-11.41	-35.06533914	-36.11111111	-1.04577197	6391030
Carex microptera	CAMI7	Graminoid	560	-21.8	-18.205	-45.63627878	-36.11111111	9.52516767	2434510
Ribes viscosissimum	RIVI3	Shrub	562	-18	-14.195	-39.39794648	-38.33333333	1.06461315	1305860
Muhlenbergia rigens	MURI2	Graminoid	562	-11.9	-6.1	-26.80460485	-5	21.80460485	1601500
Fremontodendron californicum	FRCA6	Tree, Shrub	562	-6.9	-5.7	-26.18232732	-5	21.18232732	477329
Stipa cernua	NACE	Graminoid	565	-7.4	-0.7	-18.40385812	-8.333333333	10.07052479	256098
Packera cana	PACA15	Forb/herb, Subshrub	568	-21.8	-16.9	-43.60609832	-41.66666667	1.93943165	3933120
Salix sitchensis	SASI2	Tree, Shrub	569	-26.8	-12.32	-36.48102054	-27.77777778	8.70324276	1420020
Robinia pseudoacacia	ROPS	Tree	570	-17.1	-12.61	-36.93217175	-38.33333333	-1.40116158	7200860
Cichorium intybus	CIIN	Forb/herb	570	-15.8	-12.31	-36.4654636	-41.66666667	-5.20120307	6710080
Alnus incana subsp tenuifolia	ALINT	Tree, Shrub	571	-33.5	-16.5	-42.98382078	-52.22222222	-9.23840144	5766360
Arnica cordifolia	ARCO9	Forb/herb	572	-21.8	-17.645	-44.76509023	-33.33333333	11.4317569	4245610
Fagus grandifolia	FAGR	Tree	573	-18	-15.6	-41.58369633	-42.22222222	-0.63852589	2251960
Dicentra formosa	DIFO	Forb/herb	575	-13.3	-7.4	-28.82700685	-30.55555556	-1.72854871	4151940
Carex athrostachya	CAAT3	Graminoid	578	-20.5	-13.915	-38.96235221	-36.11111111	2.8512411	2820390
Krascheninnikovia lanata	KRLA2	Subshrub, Shrub	582	-21.4	-14.1	-39.25015557	-46.66666667	-7.4165111	2554570
Chrysolepis sempervirens	CHSE11	Shrub	583	-11.2	-9.4	-31.93839452	-22.22222222	9.7161723	343223
Phlox diffusa	PHDI3	Subshrub, Forb/herb	584	-18.3	-11.7	-35.51649035	-25	10.51649035	1058510
Ludwigia palustris	LUPA	Forb/herb	584	-15.5	-10.685	-33.93746111	-36.66666667	-2.72920556	7707380
Panicum dichotomiflorum	PADI	Graminoid	584	-19.3	-10.1	-33.02738021	-41.66666667	-8.63928646	7340590
Ranunculus alismifolius	RAAL	Forb/herb	585	-21	-16.6	-43.13939017	-36.11111111	7.02827906	1982710
Thamnosma montana	THMO	Subshrub	585	-8.5	-4	-23.53764779	-18.33333333	5.20431446	308782
Aristida longiseta	ARPUL	Graminoid	587	-19.8	-13.8	-38.78344742	-36.11111111	2.67233631	4188150
Ceanothus prostratus	CEPR	Shrub, Subshrub	589	-10	-9.3	-31.78282514	-30.55555556	1.22726958	449526
Arnica mollis	ARMO4	Forb/herb	590	-20.4	-17.5	-44.53951462	-36.11111111	8.42840351	2013450
Erodium botrys	ERBO	Forb/herb	591	-6.5	0.3	-16.84816428	-8.333333333	8.514830947	663021
Juncus nevadensis	JUNE	Graminoid	592	-18.9	-10.69	-33.94523958	-36.11111111	-2.16587153	1906950
Chilopsis linearis	CHLI2	Tree, Shrub	592	-8.1	-4.1	-23.69321717	-30.55555556	-6.86233839	3306350
Schoenoplectus pungens	SCPUP5	Graminoid	594	-20.9	-11.135	-34.63752334	-38.88888889	-4.25136555	7162600
Caltha leptosepala	CALE4	Forb/herb	595	-28.6	-18.4	-45.93963908	-36.11111111	9.82852797	2388490
Cyperus strigosus	CYST	Graminoid	595	-18.4	-10.4	-33.49408836	-36.11111111	-2.61702275	7043470
Cornus nuttallii	CONU4	Tree	596	-10.8	-6.5	-27.42688239	-31.66666667	-4.23978428	912627
Phalaris arundinacea	PHAR3	Graminoid	597	-32.4	-17.62	-44.72619788	-38.88888889	5.83730899	7061550
Leymus cinereus	LECI4	Graminoid	597	-21.5	-15.52	-41.45924082	-41.66666667	-0.20742585	1891930
Cyperus esculentus	CYES	Graminoid	597	-18.3	-10.52	-33.68077162	5.555555556	39.23632718	6642500
Oxyria digyna	OXDI3	Forb/herb	598	-39	-33.215	-60	-41.66666667	18.33333333	5625330
Trifolium longipes	TRLO	Forb/herb	598	-20.8	-15.9	-42.05040448	-13.88888889	28.16151559	1726520
Sporobolus airoides	SPAI	Graminoid	599	-18.2	-13.01	-37.55444928	-38.88888889	-1.33443961	3603770
Quercus douglasii	QUDO	Tree	599	-10.4	-2.1	-20.5818295	-12.22222222	8.35960728	193034
Perideridia parishii	PEPA21	Forb/herb	602	-11.2	-9.9	-32.71624144	-36.11111111	-3.39486967	1397520
Leersia oryzoides	LEOR	Graminoid	605	-22.3	-13.4	-38.16116988	-36.11111111	2.05005877	6923770
Aesculus californica	AECA	Tree, Shrub	605	-6.9	-0.9	-18.71499689	-16.66666667	2.04833022	2426250
Pinus monophylla	PIMO	Tree	606	-14.1	-10.5	-33.64965775	-30.55555556	3.09410219	935569
Ceanothus cordulatus	CECO	Shrub	606	-10.9	-8.9	-31.1605476	-30.55555556	0.60499204	294777
Asclepias speciosa	ASSP	Forb/herb	607	-21.5	-16.97	-43.71499689	-36.11111111	7.60388578	3774600
Quercus lobata	QULO	Tree	607	-16.9	-1.2	-19.18170504	-13.88888889	5.29281615	1362320
Salix glauca	SAGL	Tree, Shrub	608	-39.6	-35.165	-60	-4.444444444	55.55555556	3153200
Helictotrichon canescens	TRCA21	Graminoid	609	-18.4	-9.3	-31.78282514	-36.11111111	-4.32828597	1727270
Polystichum munitum	POMU	Forb/herb	612	-12.9	-6.29	-27.10018668	-36.11111111	-9.01092443	1833990
Krameria erecta	KRER	Subshrub, Shrub	612	-9.6	-3.4	-22.60423149	-25	-2.39576851	644828
Sagittaria latifolia	SALA2	Forb/herb	613	-22.2	-13.74	-38.69010579	-36.11111111	2.57899468	7717010
Mimulus cardinalis	MICA3	Forb/herb	613	-10.8	-6.1	-26.80460485	-33.33333333	-6.52872848	1035610
Poa arctica	POAR2	Graminoid	614	-39.6	-35.4	-60	-52.22222222	7.77777778	5035540
Penstemon deustus	PEDE4	Subshrub, Forb/herb	616	-18.9	-13.725	-38.66677038	-36.11111111	2.55565927	1659820
Cyperus odoratus	CYOD	Graminoid	617	-19.4	-13.04	-37.6011201	5.555555556	43.15667566	6739720
Erigeron compositus	ERCO4	Forb/herb	618	-37.8	-19.815	-48.14094586	-36.11111111	12.02983475	4765260
Chimaphila umbellata	CHUM	Subshrub	618	-19.3	-14.7	-40.18357187	-38.88888889	1.29468298	5554100
Phytolacca americana	PHAM4	Forb/herb	618	-14.5	-10.3	-33.33851898	-36.11111111	-2.77259213	7035680
Lomatium macrocarpum	LOMA3	Forb/herb	618	-16.2	-9.5	-32.09396391	-33.33333333	-1.23936942	1457250
Vaccinium ovatum	VAOV2	Subshrub, Shrub	621	-5.6	-0.6	-18.24828874	-13.88888889	4.35939985	497544
Hordeum pusillum	HOPU	Graminoid	626	-17.5	-10.775	-34.07747355	0	34.07747355	6125900
Vaccinium uliginosum	VAUL	Subshrub, Shrub	627	-39.6	-33.5	-60	-38.88888889	21.11111111	5244870
Platanus racemosa	PLRA	Tree	628	-10.4	-1	-18.87056627	-13.88888889	4.98167738	383109
Erigeron philadelphicus	ERPH	Forb/herb	629	-20.5	-10.92	-34.30304916	-33.33333333	0.96971583	6952940
Poa palustris	POPA2	Graminoid	631	-32.9	-20.15	-48.6621033	-38.88888889	9.77321441	6698860
Tetradymia canescens	TECA2	Subshrub, Shrub	631	-21.8	-15.2	-40.96141879	-8.333333333	32.62808546	2159110
Prosopis glandulosa	PRGLG	Tree, Shrub	639	-13.2	-6.01	-26.66459241	-25	1.66459241	2521900
Dalea purpurea	DAPUP	Subshrub, Forb/herb	640	-21.5	-18.405	-45.94741755	-38.88888889	7.05852866	3715600
Asclepias incarnata	ASIN	Forb/herb	640	-22.1	-15.11	-40.82140635	-38.88888889	1.93251746	6060350
Lobelia cardinalis	LOCA2	Forb/herb	640	-16.5	-11.205	-34.7464219	-36.66666667	-1.92024477	6853290
Myosurus minimus	MYMI2	Forb/herb	640	-15.9	-9.71	-32.42065961	11.11111111	43.53177072	6129750
Monolepis nuttalliana	MONU	Forb/herb	642	-34.9	-15.09	-40.79029247	8.333333333	49.1236258	4932710
Monarda fistulosa	MOFI	Subshrub, Forb/herb	642	-22.6	-13	-37.53889235	-35.55555556	1.98333679	5601030
Arbutus menziesii	ARME	Tree	643	-7.6	-2.09	-20.56627256	-10.55555556	10.010717	511050
Elymus virginicus	ELVI3	Graminoid	644	-19.9	-12.955	-37.46888612	-33.33333333	4.13555279	4760360
Philadelphus lewisii	PHLE4	Shrub	654	-16.1	-11.7	-35.51649035	-13.88888889	21.62760146	1347890
Bromus marginatus	BRMA4	Graminoid	657	-20.4	-14.7	-40.18357187	-33.33333333	6.85023854	5156300
Celtis occidentalis	CEOC	Tree, Shrub	657	-22.8	-13.74	-38.69010579	-43.88888889	-5.1987831	5094590
Bromus catharticus	BRCA6	Graminoid	657	-19.1	-8.5	-30.53827007	-13.88888889	16.64938118	6337450
Agoseris grandiflora	AGGR	Forb/herb	660	-12.5	-8.105	-29.923771	-25	4.923771	1861900
Galium boreale	GABO2	Subshrub, Forb/herb	661	-39.6	-32.3	-60	-36.11111111	23.88888889	6306100
Ribes nevadense	RINE	Shrub	663	-11.1	-8.28	-30.19601742	-33.33333333	-3.13731591	245004
Rhododendron occidentale	RHOC	Shrub	663	-8.3	-5.8	-26.3378967	-10.55555556	15.78234114	460766
Melica californica	MECA2	Graminoid	663	-10.2	-4.3	-24.00435594	-13.88888889	10.11546705	313958
Carex vulpinoidea	CAVU2	Graminoid	666	-21.9	-15.4	-41.27255756	-38.88888889	2.38366867	6930410
Carex nebrascensis	CANE2	Graminoid	667	-21.8	-14.54	-39.93466086	-38.88888889	1.04577197	2634500
Juncus torreyi	JUTO	Graminoid	670	-22.2	-18.155	-45.55849409	-38.88888889	6.6696052	6259730
Agrostis gigantea	AGGI2	Graminoid	670	-22.8	-17.365	-44.32949596	-38.88888889	5.44060707	6695220
Lycopus americanus	LYAM	Forb/herb	678	-22.8	-14.4	-39.71686372	-38.88888889	0.82797483	6894840
Andropogon gerardii	ANGE	Graminoid	679	-22.1	-16.81	-43.46608587	-43.33333333	0.13275254	6196000
Rudbeckia hirta	RUHI2	Forb/herb	679	-27.6	-14.9	-40.49471064	-30.55555556	9.93915508	7817460
Rhamnus crocea	RHCR	Tree, Shrub	679	-13.7	-1.9	-20.27069073	-5.555555556	14.71513517	1294400
Solidago canadensis	SOCA6	Forb/herb	683	-33	-17.9	-45.16179216	-41.66666667	3.49512549	7723290
Rhododendron columbianum	LEGL	Shrub	685	-19.5	-14.7	-40.18357187	-33.33333333	6.85023854	1133900
Ceratophyllum demersum	CEDE4	Forb/herb	686	-33.9	-19.2	-47.18419415	-38.88888889	8.29530526	8228860
Asclepias tuberosa	ASTU	Forb/herb	689	-17.7	-11.06	-34.5208463	-36.11111111	-1.59026481	6934690
Arctostaphylos uva-ursi	ARUV	Subshrub, Shrub	695	-35.8	-30.06	-60	-36.11111111	23.88888889	6008330
Populus deltoides	PODE3	Tree	695	-19.9	-14.79	-40.32358432	-41.66666667	-1.34308235	6229960
Artemisia tridentata subsp tri	ARTRT	Tree, Shrub	702	-19	-13.7	-38.62787803	-25	13.62787803	1962370
Schoenoplectus acutus	SCACA	Graminoid	702	-22.1	-11.495	-35.19757312	-38.88888889	-3.69131577	5989610
Luzula parviflora	LUPA4	Graminoid	704	-38.2	-26.97	-60	-36.11111111	23.88888889	6355720
Geum macrophyllum	GEMA4	Forb/herb	706	-34.4	-23.575	-60	-36.11111111	23.88888889	5918420
Hilaria rigida	PLRI3	Graminoid	706	-8.5	-2.55	-21.28189172	-11.11111111	10.17078061	406730
Ribes sanguineum	RISA	Shrub	707	-9.5	-5.77	-26.29122589	-13.88888889	12.402337	947461
Glycyrrhiza lepidota	GLLE3	Forb/herb	708	-22.8	-17.2	-44.07280647	-38.88888889	5.18391758	5026730
Grayia spinosa	GRSP	Subshrub, Shrub	708	-20.7	-10.6	-33.80522713	-36.11111111	-2.30588398	1344040
Prunus virginiana var demissa	PRVID	Tree, Shrub	709	-16.2	-8.7	-30.84940884	-38.88888889	-8.03948005	1779790
Dalea candida	DACAC	Subshrub, Forb/herb	710	-20.4	-16.255	-42.60267579	-38.88888889	3.7137869	3960760
Abies concolor	ABCO	Tree	711	-18.4	-9.9	-32.71624144	-38.88888889	-6.17264745	4384410
Oenothera cespitosa	OECA10	Forb/herb, Subshrub	712	-21.8	-15.9	-42.05040448	-25	17.05040448	2333340
Fraxinus pennsylvanica	FRPE	Tree	713	-21.6	-17.92	-45.19290604	-43.88888889	1.30401715	6325190
Aconitum columbianum	ACCO4	Forb/herb	717	-21.4	-16.7	-43.29495955	-33.33333333	9.96162622	4381860
Muhlenbergia asperifolia	MUAS	Graminoid	717	-21.2	-15.02	-40.6813939	-27.77777778	12.90361612	3875430
Ranunculus cymbalaria	RACY	Forb/herb	718	-33.6	-15.9	-42.05040448	-38.88888889	3.16151559	6576610
Alopecurus aequalis	ALAE	Graminoid	719	-33.6	-24.87	-60	-38.88888889	21.11111111	6470530
Rorippa curvisiliqua	ROCU	Forb/herb	722	-27.4	-10	-32.87181083	11.11111111	43.98292194	1433700
Muhlenbergia richardsonis	MURI	Graminoid	732	-21.6	-16.645	-43.20939639	-33.33333333	9.87606306	4463720
Oenothera elata	OEEL	Forb/herb	733	-21.6	-10.95	-34.34971998	-30.55555556	3.79416442	2494180
Rhus ovata	RHOV	Tree, Shrub	734	-8.2	-1.5	-19.64841319	-13.88888889	5.7595243	610454
Poa bulbosa	POBU	Graminoid	735	-17.6	-11.83	-35.71873055	-36.11111111	-0.39238056	5992720
Penstemon newberryi	PENE3	Subshrub, Forb/herb	736	-11.2	-10.5	-33.64965775	-30.55555556	3.09410219	226444
Poa glauca	POGL	Graminoid	739	-39.6	-35.3	-60	-40	20	6339370
Bistorta bistortoides	POBI6	Forb/herb	740	-20.8	-16.9	-43.60609832	-38.88888889	4.71720943	2237580
Calocedrus decurrens	CADE27	Tree	742	-10	-8.3	-30.2271313	-31.66666667	-1.43953537	5057710
Erigeron strigosus	ERST3	Forb/herb	743	-21.5	-11	-34.42750467	-33.33333333	1.09417134	7175260
Juncus tenuis	JUTE	Graminoid	745	-22.1	-12.48	-36.72993155	-38.88888889	-2.15895734	7606240
Juniperus virginiana	JUVI	Tree	747	-19.5	-13.5	-38.31673927	-41.66666667	-3.3499274	7273000
Cercocarpus ledifolius	CELE3	Tree, Shrub	747	-18.6	-12.87	-37.33665215	-43.88888889	-6.55223674	1402120
Stipa lepida	NALE2	Graminoid	751	-4.3	0.35	-16.77037959	-8.333333333	8.437046257	954950
Mimulus guttatus	MIGU	Forb/herb	755	-30	-16.83	-43.49719975	-38.88888889	4.60831086	3122640
Medicago sativa	MESA	Forb/herb	757	-27.6	-16.44	-42.89047915	-41.66666667	1.22381248	7675910
Hieracium albiflorum	HIAL2	Forb/herb	757	-19.5	-13.62	-38.50342253	-36.11111111	2.39231142	2143790
Trifolium wormskioldii	TRWO	Forb/herb	758	-21.4	-10	-32.87181083	-33.33333333	-0.4615225	1968250
Salvia dorrii	SADO4	Subshrub, Shrub	760	-11	-8.5	-30.53827007	-30.55555556	-0.01728549	1007110
Ratibida columnifera	RACO3	Forb/herb	763	-21.5	-15.5	-41.42812694	-41.66666667	-0.23853973	6297070
Juncus ensifolius	JUEN	Graminoid	763	-19.1	-14.09	-39.23459863	-38.88888889	0.34570974	5428200
Corylus cornuta	COCO6	Tree, Shrub	763	-22.2	-11.8	-35.67205974	-43.88888889	-8.21682915	5688480
Sorghum halepense	SOHA	Graminoid	763	-16.4	-9.6	-32.24953329	-25	7.24953329	6608940
Pinus ponderosa	PIPO	Tree	764	-19.5	-14.3	-39.56129434	-37.77777778	1.78351656	5291600
Eleocharis acicularis	ELAC	Graminoid	766	-34.2	-22.625	-60	-30.55555556	29.44444444	8572430
Carex praegracilis	CAPR5	Graminoid	766	-21.6	-16.45	-42.90603609	-38.88888889	4.0171472	4552540
Schizachyrium scoparium	SCSC	Graminoid	768	-23.2	-15.365	-41.21810828	-38.88888889	2.32921939	7014710
Lolium multiflorum	LOPEM2	Graminoid	769	-30.3	-7.2	-28.51586808	-22.22222222	6.29364586	7869370
Eriodictyon californicum	ERCA6	Shrub	770	-7.2	-4.7	-24.62663348	-19.44444444	5.18218904	472388
Agrostis pallens	AGPA8	Graminoid	771	-18.3	-8.9	-31.1605476	-30.55555556	0.60499204	1299820
Symphoricarpos albus	SYAL	Subshrub, Shrub	775	-20.7	-12.7	-37.07218419	-38.88888889	-1.8167047	5299440
Arctostaphylos nevadensis	ARNE	Subshrub, Shrub	776	-13.6	-9.325	-31.82171749	-25	6.82171749	503412
Ephedra viridis	EPVI	Shrub	785	-15.9	-10.88	-34.24082141	-27.77777778	6.46304363	1389090
Festuca idahoensis	FEID	Graminoid	795	-20.7	-17.5	-44.53951462	-38.88888889	5.65062573	2208740
Prunus serotina	PRSE2	Tree, Shrub	795	-21.3	-15	-40.65028002	-36.11111111	4.53916891	7105870
Arctostaphylos manzanita	ARMA	Shrub	795	-8.7	-3.5	-22.75980087	-30.55555556	-7.79575469	261013
Rosa gymnocarpa	ROGY	Subshrub	800	-14.9	-8.005	-29.76820162	-27.77777778	1.99042384	1053230
Phleum alpinum	PHAL2	Graminoid	801	-33.3	-18	-45.31736154	-41.66666667	3.65069487	5233310
Poa compressa	POCO	Graminoid	801	-32.7	-15.3	-41.11698818	-38.88888889	2.22809929	6887190
Arisaema triphyllum	ARTR	Forb/herb	804	-21	-15	-40.65028002	-27.77777778	12.87250224	3000200
Trifolium pratense	TRPR2	Forb/herb	806	-30	-15.2	-40.96141879	-36.66666667	4.29475212	7710180
Viola sororia	VISO	Forb/herb	809	-20.8	-13.5	-38.31673927	-33.33333333	4.98340594	7132620
Penstemon speciosus	PESP	Forb/herb	810	-17.7	-12.1	-36.13876789	-36.11111111	0.02765678	917468
Tragopogon dubius	TRDU	Forb/herb	811	-20.8	-15.85	-41.97261979	-33.33333333	8.63928646	6356740
Bouteloua aristidoides	BOGR2	Graminoid	814	-22.1	-16.9	-43.60609832	-41.66666667	1.93943165	4366590
Populus fremontii	POFR2	Tree	816	-16.4	-7.85	-29.52706907	-25	4.52706907	1287120
Glyceria striata	GLST	Graminoid	817	-34	-17.74	-44.91288114	-37.22222222	7.69065892	7243690
Populus tremuloides	POTR5	Tree	819	-35.4	-22.95	-60	-56.66666667	3.33333333	6671520
Stipa pulchra	NAPU4	Graminoid	821	-9.2	0.1	-17.15930305	-11.11111111	6.04819194	981393
Cephalanthus occidentalis	CEOC2	Tree, Shrub	822	-15.4	-10.595	-33.79744866	-36.11111111	-2.31366245	5769920
Senecio triangularis	SETR	Subshrub, Forb/herb	828	-24.5	-17.7	-44.85065339	-36.11111111	8.73954228	2410610
Galium trifidum	GATR2	Vine, Forb/herb	829	-34.7	-25.84	-60	-38.88888889	21.11111111	6816380
Panicum virgatum	PAVI2	Graminoid	829	-23.4	-13.66	-38.56565028	-41.66666667	-3.10101639	6579520
Ceanothus velutinus	CEVE	Tree, Shrub	830	-17.5	-14.055	-39.18014935	-30.55555556	8.62459379	1919340
Carex utriculata	CAUT	Graminoid	836	-34.7	-28.3	-60	-41.66666667	18.33333333	6318490
Melilotus officinalis	MEOF	Forb/herb	836	-28	-16.3	-42.67268202	-38.88888889	3.78379313	8183830
Arctostaphylos glauca	ARGL4	Tree, Shrub	836	-6.1	-2.8	-21.67081518	-11.11111111	10.55970407	196342
Bidens cernua	BICE	Forb/herb	840	-33	-20.905	-49.83665215	8.333333333	58.16998548	6498260
Castilleja angustifolia	CAAN7	Subshrub, Forb/herb	840	-21.4	-14.515	-39.89576851	-36.11111111	3.7846574	1785010
Alnus rhombifolia	ALRH2	Tree	840	-10.9	-5.8	-26.3378967	-31.11111111	-4.77321441	809807
Bouteloua curtipendula	BOCU	Graminoid	841	-20.2	-14.4	-39.71686372	-41.66666667	-1.94980295	5775190
Solidago multiradiata	SOMU	Subshrub, Forb/herb	846	-39.6	-33.4	-60	-52.22222222	7.77777778	3877240
Persicaria punctata	POPU5	Forb/herb	846	-15.4	-11	-34.42750467	0	34.42750467	6877040
Carex aquatilis	CAAQ	Graminoid	849	-39.6	-33.9	-60	-38.88888889	21.11111111	6895790
Sidalcea oregana	SIOR	Subshrub, Forb/herb	851	-17.7	-12.25	-36.37212197	-38.88888889	-2.51676692	1106110
Senecio vulgaris	SEVU	Forb/herb	851	-33.5	-8.4	-30.38270068	8.333333333	38.71603401	7572370
Quercus garryana	QUGA4	Tree, Shrub	853	-10.4	-6.1	-26.80460485	-36.11111111	-9.30650626	528135
Acer macrophyllum	ACMA3	Tree	853	-12.5	-5.34	-25.62227754	-25.55555556	0.06672198	1201360
Carex lenticularis	CALE8	Graminoid	854	-31.3	-15.4	-41.27255756	-38.88888889	2.38366867	6256800
Danthonia californica	DACA3	Graminoid	861	-17.7	-10.7	-33.96079652	-8.333333333	25.62746319	2231440
Alnus incana	ALIN2	Tree, Shrub	865	-33.5	-25	-60	-36.11111111	23.88888889	6369520
Pinus contorta	PICO	Tree	873	-21	-14.9	-40.49471064	-56.66666667	-16.17195603	3816460
Linum lewisii	LILE3	Subshrub, Forb/herb	875	-36.7	-19.91	-48.28873678	-37.77777778	10.510959	4803030
Purshia tridentata	PUTR2	Shrub	875	-21.8	-14.3	-39.56129434	-37.77777778	1.78351656	1848680
Lupinus latifolius	LULA4	Forb/herb	882	-15	-8.89	-31.14499067	-27.77777778	3.36721289	1873200
Trifolium repens	TRRE3	Forb/herb	884	-28.1	-15.7	-41.73926571	-52.22222222	-10.48295651	8055890
Juniperus occidentalis	JUOC	Tree	890	-14.1	-10	-32.87181083	-36.11111111	-3.23930028	892477
Typha latifolia	TYLA	Forb/herb	891	-33.5	-18.15	-45.55071562	-37.77777778	7.77293784	8227500
Holcus lanatus	HOLA	Graminoid	905	-13.5	-8.48	-30.50715619	-30.55555556	-0.04839937	7266870
Juniperus communis	JUCO6	Tree, Shrub	906	-36.7	-27.8	-60	-41.66666667	18.33333333	7870560
Ceanothus greggii	CEGR	Shrub	907	-11.4	-7.9	-29.60485376	-25	4.60485376	1061980
Rosa californica	ROCA2	Subshrub	910	-10	-5.12	-25.28002489	-13.88888889	11.391136	1611280
Vicia villosa	VIVI	Vine, Forb/herb	911	-16.4	-10.7	-33.96079652	-34.44444444	-0.48364792	7332580
Pseudotsuga menziesii	PSME	Tree	915	-19.1	-14.6	-40.02800249	-36.11111111	3.91689138	6133870
Bromus inermis	BRIN2	Graminoid	917	-39.5	-18.76	-46.49968886	-41.66666667	4.83302219	7328740
Lolium perenne	LOPE	Graminoid	919	-26.8	-9.3	-31.78282514	-27.77777778	4.00504736	7954940
Medicago polymorpha	MEPO3	Forb/herb	926	-13.7	0	-17.31487243	0	17.31487243	6665300
Juncus effusus	JUEF	Graminoid	930	-18.1	-10.6	-33.80522713	-38.88888889	-5.08366176	8060420
Encelia farinosa	ENFA	Subshrub, Shrub	937	-16.9	-1	-18.87056627	-2.777777778	16.09278849	585456
Amorpha fruticosa	AMFR	Shrub	944	-19.4	-12.885	-37.35998755	-38.88888889	-1.52890134	6868700
Bidens frondosa	BIFR	Forb/herb	946	-22.7	-19.7	-47.96204107	8.333333333	56.2953744	6888220
Hordeum brachyantherum	HOBR2	Graminoid	949	-28.2	-14.96	-40.58805227	-41.66666667	-1.0786144	5410770
Medicago lupulina	MELU	Forb/herb	950	-26.9	-14.055	-39.18014935	-5	34.18014935	8085020
Leymus triticoides	LETR5	Graminoid	950	-21.1	-10	-32.87181083	-41.66666667	-8.79485584	2074100
Astragalus purshii	ASPU9	Forb/herb	952	-17.8	-14.545	-39.94243933	-36.11111111	3.83132822	1826610
Bromus rubens	BRRU2	Graminoid	953	-12.8	-5.4	-25.71561917	-5.555555556	20.16006361	1506740
Plantago major	PLMA2	Forb/herb	954	-34	-17.835	-45.06067206	-38.88888889	6.17178317	8916190
Plantago patagonica	PLPA2	Forb/herb	956	-21.6	-11.525	-35.24424393	11.11111111	46.35535504	6076940
Scirpus microcarpus	SCMI2	Graminoid	957	-30.7	-13.5	-38.31673927	-38.88888889	-0.57214962	6134150
Anaphalis margaritacea	ANMA	Forb/herb	964	-22.9	-16.485	-42.96048538	-41.66666667	1.29381871	6978980
Ribes aureum	RIAU	Shrub	968	-19.2	-16	-42.20597386	-38.88888889	3.31708497	5706290
Salix gooddingii	SAGO	Tree	968	-11.4	-7.33	-28.71810828	-30.55555556	-1.83744728	1949310
Eriogonum microthecum	ERMI4	Subshrub, Shrub	969	-18.4	-13.86	-38.87678905	-38.88888889	-0.01209984	1636050
Heterotheca villosa	HEVI4	Subshrub, Forb/herb	970	-22.5	-19.7	-47.96204107	-36.11111111	11.85092996	4784040
Lonicera involucrata	LOIN5	Shrub	975	-21	-15.9	-42.05040448	-41.66666667	0.38373781	2785780
Chaenactis douglasii	CHDO	Forb/herb	977	-21.8	-16.4	-42.8282514	-38.88888889	3.93936251	1910740
Senecio integerrimus	SEIN2	Forb/herb	993	-21.8	-16.5	-42.98382078	-38.88888889	4.09493189	2620160
Umbellularia californica	UMCA	Tree, Shrub	995	-10.4	-2.8	-21.67081518	-25	-3.32918482	2480040
Sporobolus cryptandrus	SPCR	Graminoid	1001	-20.3	-13.7	-38.62787803	-38.88888889	-0.26101086	6422740
Clematis ligusticifolia	CLLI2	Vine	1003	-19.5	-13.9	-38.9390168	-38.88888889	0.05012791	3111820
Agrostis stolonifera	AGST2	Graminoid	1003	-22.1	-13.8	-38.78344742	-47.22222222	-8.4387748	7141700
Poa fendleriana	POFE	Graminoid	1010	-21.8	-17.055	-43.84723086	-38.88888889	4.95834197	3106680
Ambrosia dumosa	AMDU2	Subshrub, Shrub	1010	-8.5	-2.5	-21.20410703	-23.88888889	-2.68478186	610028
Cynodon dactylon	CYDA	Graminoid	1031	-12.5	-8.3	-30.2271313	-22.22222222	8.00490908	6846360
Chrysothamnus viscidiflorus	CHVI8	Shrub	1044	-21.8	-16.885	-43.58276291	-30.55555556	13.02720735	2024180
Salix scouleriana	SASC	Tree, Shrub	1048	-34	-20.295	-48.8876789	-25	23.8876789	3141480
Gutierrezia sarothrae	GUSA2	Subshrub, Shrub, Forb/herb	1053	-21.5	-12.3	-36.44990666	-38.88888889	-2.43898223	3642240
Collinsia parviflora	COPA3	Forb/herb	1057	-19.2	-14.12	-39.28126945	-36.11111111	3.17015834	4638590
Baccharis pilularis	BAPI	Subshrub, Shrub	1057	-5.8	0.7	-16.22588675	-5.555555556	10.67033119	385305
Sambucus racemosa	SASAD	Tree, Shrub	1063	-22.7	-16.6	-43.13939017	-25	18.13939017	6613870
Deschampsia danthonioides	DEDA	Graminoid	1065	-18.9	-9.4	-31.93839452	11.11111111	43.04950563	3165630
Phleum pratense	PHPR3	Graminoid	1069	-28	-17.62	-44.72619788	-41.66666667	3.05953121	7346920
Rosa woodsii	ROWO	Subshrub	1072	-34.5	-15.445	-41.34256378	-41.66666667	-0.32410289	4514570
Stellaria longipes	STLO2	Forb/herb	1094	-39.6	-34.3	-60	-36.11111111	23.88888889	6731490
Quercus kelloggii	QUKE	Tree, Shrub	1096	-13.8	-6.825	-27.93248289	-19.44444444	8.48803845	1961590
Calamagrostis canadensis	CACA4	Graminoid	1105	-39.6	-28.86	-60	-36.11111111	23.88888889	8233060
Rubus parviflorus	RUPA	Subshrub	1108	-20.4	-13.1	-37.69446173	-33.33333333	4.3611284	4592680
Potentilla gracilis	POGR9	Subshrub, Forb/herb	1127	-26.8	-14.9	-40.49471064	-41.66666667	-1.17195603	2705290
Phacelia hastata	PHHA	Forb/herb	1128	-19.7	-15.4	-41.27255756	-38.88888889	2.38366867	2174500
Eclipta prostrata	ECPR	Forb/herb	1129	-28.2	-9.36	-31.87616677	0	31.87616677	8040290
Rubus ursinus	RUUR	Subshrub	1130	-11	-5.4	-25.71561917	-13.88888889	11.82673028	1262520
Heliotropium curassavicum	HECU3	Subshrub, Forb/herb	1138	-21.6	-8.815	-31.02831363	-33.33333333	-2.3050197	6916930
Deschampsia elongata	DEEL	Graminoid	1146	-18.9	-10.5	-33.64965775	-38.88888889	-5.23923114	4653490
Acer negundo	ACNE2	Tree	1154	-21.9	-15.035	-40.70472931	-43.33333333	-2.62860402	7523900
Chamerion angustifolium	CHANA2	Forb/herb	1155	-39.6	-27.46	-60	-38.88888889	21.11111111	7810860
Persicaria amphibia	POAM8	Forb/herb	1163	-33.9	-19.7	-47.96204107	-30.55555556	17.40648551	7287230
Poa annua	POAN	Graminoid	1167	-32.5	-11.8	-35.67205974	8.333333333	44.00539307	8810200
Prunus emarginata	PREM	Tree, Shrub	1181	-14.9	-10	-32.87181083	-30.55555556	2.31625527	1927010
Larrea tridentata	LATRA	Shrub	1183	-11.3	-3.4	-22.60423149	-30.55555556	-7.95132407	1395570
Mentha arvensis	MEAR4	Forb/herb	1195	-32.3	-17.9	-45.16179216	-36.11111111	9.05068105	6930330
Ribes roezlii	RIRO	Shrub	1196	-10	-8.1	-29.91599253	-33.33333333	-3.4173408	690487
Atriplex canescens	ATCA2	Shrub	1197	-21.5	-12.1	-36.13876789	-41.66666667	-5.52789878	3242780
Ceanothus integerrimus	CEIN3	Shrub	1204	-10.9	-6.5	-27.42688239	-25	2.42688239	1028160
Adenostoma fasciculatum	ADFA	Shrub	1218	-11.1	-1	-18.87056627	0	18.87056627	292084
Ipomopsis aggregata	IPAGA3	Forb/herb	1227	-21.8	-16.9	-43.60609832	-27.77777778	15.82832054	2159820
Equisetum laevigatum	EQLA	Forb/herb	1237	-22.1	-14.82	-40.37025513	-38.88888889	1.48136624	5969110
Quercus agrifolia	QUAG	Tree, Shrub	1243	-5.9	-0.1	-17.47044182	-13.88888889	3.58155293	287069
Aquilegia formosa	AQFO	Forb/herb	1244	-23.7	-12.9	-37.38332296	-30.55555556	6.8277674	4581000
Sphaeralcea ambigua	SPAM2	Subshrub, Forb/herb	1250	-11.4	-8.1	-29.91599253	-21.11111111	8.80488142	832001
Festuca rubra	FERU2	Graminoid	1266	-39.6	-28.45	-60	-41.66666667	18.33333333	8358050
Salix lasiandra	SALUL	Tree, Shrub	1281	-32.4	-14.9	-40.49471064	-34.44444444	6.0502662	3168910
Arctostaphylos patula	ARPA6	Shrub	1281	-16.9	-9.4	-31.93839452	-33.33333333	-1.39493881	1589490
Equisetum arvense	EQAR	Forb/herb	1301	-39.6	-32.2	-60	-41.66666667	18.33333333	8101490
Pteridium aquilinum	PTAQ	Forb/herb	1305	-22.8	-14.7	-40.18357187	-41.66666667	-1.4830948	7944800
Prunella vulgaris	PRVU	Forb/herb	1326	-20.8	-13.5	-38.31673927	-38.88888889	-0.57214962	7660100
Juncus balticus	JUBA		1343	-28.9	-14	-39.09458619	-41.66666667	-2.57208048	7715490
Trisetum spicatum	TRSP2	Graminoid	1359	-39.6	-32.8	-60	-38.88888889	21.11111111	7420810
Baccharis salicina	BASA4	Shrub	1370	-11.4	-2.3	-20.89296826	-19.44444444	1.44852382	1254850
Distichlis spicata	DISP	Graminoid	1374	-20.9	-11.8	-35.67205974	-37.22222222	-1.55016248	7520780
Agrostis scabra	AGSC5	Graminoid	1396	-39.6	-20.2	-48.73988799	-38.88888889	9.8509991	8577530
Athyrium filix-femina	ATFI	Forb/herb	1404	-34	-14.8	-40.33914126	-38.88888889	1.45025237	8145830
Apocynum cannabinum	APCA	Forb/herb	1408	-22.6	-14.4	-39.71686372	-41.66666667	-1.94980295	7329850
Eriogonum wrightii	ERWR	Subshrub, Shrub, Forb/herb	1421	-11.2	-9.1	-31.47168637	-25	6.47168637	1135150
Prunus virginiana	PRVI	Tree, Shrub	1427	-21.8	-13.3	-38.0056005	-41.66666667	-3.66106617	7062590
Lupinus argenteus	LUAR3	Subshrub, Forb/herb	1467	-21.6	-16.47	-42.93714997	-41.66666667	1.2704833	3102750
Melica imperfecta	MEIM	Graminoid	1510	-8.5	-2.8	-21.67081518	-2.777777778	18.8930374	287713
Oryzopsis hymenoides	ACHY	Graminoid	1516	-21.6	-15.7	-41.73926571	-41.66666667	0.07259904	3133570
Claytonia perfoliata	CLPE	Forb/herb	1516	-14.1	-8.025	-29.79931549	11.11111111	40.9104266	3162570
Potentilla glandulosa	POGL9	Subshrub, Forb/herb	1526	-18.9	-12.275	-36.41101431	-36.11111111	0.2999032	2286310
Cornus sericea	COSES	Tree, Shrub	1543	-33.8	-18.3	-45.7840697	-38.88888889	6.89518081	6841210
Quercus chrysolepis	QUCH2	Tree, Shrub	1549	-10.9	-6.2	-26.96017424	-11.66666667	15.29350757	812703
Ceanothus cuneatus	CECU	Shrub	1556	-8.2	-4.8	-24.78220286	-25	-0.21779714	471102
Avena fatua	AVFA	Graminoid	1628	-28.2	-20.465	-49.15214686	-30.55555556	18.5965913	7408550
Juncus bufonius	JUBU	Graminoid	1646	-34.1	-13.3	-38.0056005	8.333333333	46.33893383	8444980
Koeleria macrantha	KOMA	Graminoid	1730	-25.5	-15.9	-42.05040448	-38.88888889	3.16151559	5486200
Ribes cereum	RICE	Shrub	1741	-21.4	-14.7	-40.18357187	-30.55555556	9.62801631	4676450
Agrostis exarata	AGEX	Graminoid	1778	-34	-14.315	-39.58462974	-38.88888889	0.69574085	3526550
Rhus aromatica	RHTR	Shrub	1780	-18.7	-11.905	-35.83540759	-47.22222222	-11.38681463	6290490
Holodiscus discolor	HODI	Shrub	1786	-19.2	-10.1	-33.02738021	-13.88888889	19.13849132	2317440
Vicia americana	VIAM	Vine, Forb/herb	1799	-22.8	-16.4	-42.8282514	-38.88888889	3.93936251	5403930
Bromus hordeaceus	BRHOH	Graminoid	1811	-19.9	-7.4	-28.82700685	-8.333333333	20.49367352	7089060
Artemisia tridentata	ARTR2	Tree, Shrub	1820	-35	-15.675	-41.70037337	-41.66666667	0.0337067	3224250
Galium aparine	GAAP2	Vine, Forb/herb	1887	-17.1	-10.1	-33.02738021	11.11111111	44.13849132	7536280
Artemisia ludoviciana	ARLU	Subshrub, Forb/herb	1918	-22.5	-16.115	-42.38487866	-36.11111111	6.27376755	6930910
Polypogon monspeliensis	POMO5	Graminoid	1953	-17.4	-10.14	-33.08960797	11.11111111	44.20071908	7089700
Cercocarpus montanus	CEMO2	Tree, Shrub	1967	-21.1	-11.8	-35.67205974	-40.55555556	-4.88349582	2218800
Bromus carinatus	BRCA5	Graminoid	1981	-20.8	-11.1	-34.58307405	-8.333333333	26.24974072	4414380
Salix exigua	SAEX	Tree, Shrub	2084	-33.6	-12.6	-36.91661481	-38.88888889	-1.97227408	7585470
Eschscholzia californica	ESCA2	Forb/herb	2088	-28.2	-4.165	-23.79433727	-13.88888889	9.90544838	7332270
Astragalus lentiginosus	ASLE8	Forb/herb, Shrub, Subshrub	2182	-21.8	-10.6	-33.80522713	-33.33333333	0.4718938	2019480
Castilleja applegatei	CAAP4	Subshrub, Forb/herb	2251	-21.4	-10.5	-33.64965775	-33.33333333	0.31632442	1743210
Ericameria nauseosa	ERNAN5	Shrub, Subshrub	2407	-21.5	-13.57	-38.42563783	-38.88888889	-0.46325106	3223520
Eriogonum fasciculatum	ERFA2	Subshrub, Shrub	2423	-10.9	-3.4	-22.60423149	-13.88888889	8.7153426	589514
Erysimum capitatum	ERCAC	Forb/herb	2563	-34.5	-14.9	-40.49471064	-33.33333333	7.16137731	5972330
Eriogonum umbellatum	ERUM	Subshrub, Shrub, Forb/herb	2919	-21.6	-14.7	-40.18357187	-13.88888889	26.29468298	2275680
Poa secunda	POSE	Graminoid	4236	-28	-15.525	-41.46701929	-37.77777778	3.68924151	4111930
